# Supplementary material for: Age-related polygenic effects of Alzheimer's disease on brain structures and cognition in middle aged and elderly adults from UK Biobank
Source: Research Square preprint supplement (doi:10.21203/rs.3.rs-4242200/v1), 2024-05-03
Supplement: Supplementary file 1 [file 0dd692e6a0506ea1b83a8da0.xlsx]

## Sheet: Supplementary Table 1
Supplementary Table 1: UKB coding of brain diseases for exclusion
Field 20002: Non-cancer illness code, self-reported
coding	description
1081	stroke
1491	brain haemorrhage
1082	transient ischaemic attack (tia)
1083	subdural haemorrhage/haematoma
1086	subarachnoid haemorrhage
1583	ischaemic stroke
1425	cerebral aneurysm
1244	infection of nervous system
1245	brain abscess/intracranial abscess
1246	encephalitis
1247	meningitis
1258	chronic/degenerative neurological problem
1259	motor neurone disease
1260	myasthenia gravis
1261	multiple sclerosis
1262	parkinsons disease
1263	dementia/alzheimers/cognitive impairment
1397	other demyelinating disease (not multiple sclerosis)
1433	cerebral palsy
1434	other neurological problem
1659	meningioma / benign meningeal tumour
1683	benign neuroma
1240	neurological injury/trauma
1266	head injury
Filed 41270: Diagnoses - ICD10
coding	description
C70	C70 Malignant neoplasm of meninges
C700	C70.0 Cerebral meninges
C709	C70.9 Meninges, unspecified
C71	C71 Malignant neoplasm of brain
C710	C71.0 Cerebrum, except lobes and ventricles
C711	C71.1 Frontal lobe
C712	C71.2 Temporal lobe
C713	C71.3 Parietal lobe
C714	C71.4 Occipital lobe
C715	C71.5 Cerebral ventricle
C716	C71.6 Cerebellum
C717	C71.7 Brain stem
C718	C71.8 Overlapping lesion of brain
C719	C71.9 Brain, unspecified
F00	F00 Dementia in Alzheimer's disease
F000	F00.0 Dementia in Alzheimer's disease with early onset
F001	F00.1 Dementia in Alzheimer's disease with late onset
F002	F00.2 Dementia in Alzheimer's disease, atypical or mixed type
F009	F00.9 Dementia in Alzheimer's disease, unspecified
F01	F01 Vascular dementia
F010	F01.0 Vascular dementia of acute onset
F011	F01.1 Multi-infarct dementia
F012	F01.2 Subcortical vascular dementia
F013	F01.3 Mixed cortical and subcortical vascular dementia
F018	F01.8 Other vascular dementia
F019	F01.9 Vascular dementia, unspecified
F02	F02 Dementia in other diseases classified elsewhere
F020	F02.0 Dementia in Pick's disease
F021	F02.1 Dementia in Creutzfeldt-Jakob disease
F022	F02.2 Dementia in Huntington's disease
F023	F02.3 Dementia in Parkinson's disease
F024	F02.4 Dementia in human immunodeficiency virus [HIV] disease
F028	F02.8 Dementia in other specified diseases classified elsewhere
F03	F03 Unspecified dementia
F06	F06 Other mental disorders due to brain damage and dysfunction and to physical disease
F060	F06.0 Organic hallucinosis
F061	F06.1 Organic catatonic disorder
F062	F06.2 Organic delusional [schizophrenia-like] disorder
F063	F06.3 Organic mood [affective] disorders
F064	F06.4 Organic anxiety disorder
F065	F06.5 Organic dissociative disorder
F066	F06.6 Organic emotionally labile [asthenic] disorder
F067	F06.7 Mild cognitive disorder
F068	F06.8 Other specified mental disorders due to brain damage and dysfunction and to physical disease
F069	F06.9 Unspecified mental disorder due to brain damage and dysfunction and to physical disease
F07	F07 Personality and behavioural disorders due to brain disease, damage and dysfunction
F070	F07.0 Organic personality disorder
F071	F07.1 Postencephalitic syndrome
F072	F07.2 Postconcussional syndrome
F078	F07.8 Other organic personality and behavioural disorders due to brain disease, damage and dysfunction
F079	F07.9 Unspecified organic personality and behavioural disorder due to brain disease, damage and dysfunction
F09	F09 Unspecified organic or symptomatic mental disorder
G00	G00 Bacterial meningitis, not elsewhere classified
G000	G00.0 Haemophilus meningitis
G001	G00.1 Pneumococcal meningitis
G002	G00.2 Streptococcal meningitis
G003	G00.3 Staphylococcal meningitis
G008	G00.8 Other bacterial meningitis
G009	G00.9 Bacterial meningitis, unspecified
G01	G01 Meningitis in bacterial diseases classified elsewhere
G02	G02 Meningitis in other infectious and parasitic diseases classified elsewhere
G020	G02.0 Meningitis in viral diseases classified elsewhere
G021	G02.1 Meningitis in mycoses
G028	G02.8 Meningitis in other specified infectious and parasitic diseases classified elsewhere
G03	G03 Meningitis due to other and unspecified causes
G030	G03.0 Nonpyogenic meningitis
G031	G03.1 Chronic meningitis
G032	G03.2 Benign recurrent meningitis [Mollaret]
G038	G03.8 Meningitis due to other specified causes
G039	G03.9 Meningitis, unspecified
G04	G04 Encephalitis, myelitis and encephalomyelitis
G040	G04.0 Acute disseminated encephalitis
G041	G04.1 Tropical spastic paraplegia
G042	G04.2 Bacterial meningoencephalitis and meningomyelitis, not elsewhere classified
G048	G04.8 Other encephalitis, myelitis and encephalomyelitis
G049	G04.9 Encephalitis, myelitis and encephalomyelitis, unspecified
G05	G05 Encephalitis, myelitis and encephalomyelitis in diseases classified elsewhere
G050	G05.0 Encephalitis, myelitis and encephalomyelitis in bacterial diseases classified elsewhere
G051	G05.1 Encephalitis, myelitis and encephalomyelitis in viral diseases classified elsewhere
G052	G05.2 Encephalitis, myelitis and encephalomyelitis in other infectious and parasitic diseases classified elsewhere
G058	G05.8 Encephalitis, myelitis and encephalomyelitis in other diseases classified elsewhere
G06	G06 Intracranial and intraspinal abscess and granuloma
G060	G06.0 Intracranial abscess and granuloma
G062	G06.2 Extradural and subdural abscess, unspecified
G07	G07 Intracranial and intraspinal abscess and granuloma in diseases classified elsewhere
G08	G08 Intracranial and intraspinal phlebitis and thrombophlebitis
G09	G09 Sequelae of inflammatory diseases of central nervous system
G10	G10 Huntington's disease
G11	G11 Hereditary ataxia
G110	G11.0 Congenital nonprogressive ataxia
G111	G11.1 Early-onset cerebellar ataxia
G112	G11.2 Late-onset cerebellar ataxia
G113	G11.3 Cerebellar ataxia with defective DNA repair
G114	G11.4 Hereditary spastic paraplegia
G118	G11.8 Other hereditary ataxias
G119	G11.9 Hereditary ataxia, unspecified
G13	G13 Systemic atrophies primarily affecting central nervous system in diseases classified elsewhere
G130	G13.0 Paraneoplastic neuromyopathy and neuropathy
G131	G13.1 Other systemic atrophy primarily affecting central nervous system in neoplastic disease
G132	G13.2 Systemic atrophy primarily affecting central nervous system in myxoedema
G138	G13.8 Systemic atrophy primarily affecting central nervous system in other diseases classified elsewhere
G14	G14 Postpolio syndrome
G20	G20 Parkinson's disease
G21	G21 Secondary Parkinsonism
G210	G21.0 Malignant neuroleptic syndrome
G211	G21.1 Other drug-induced secondary Parkinsonism
G212	G21.2 Secondary Parkinsonism due to other external agents
G213	G21.3 Postencephalitic Parkinsonism
G214	G21.4 Vascular parkinsonism
G218	G21.8 Other secondary Parkinsonism
G219	G21.9 Secondary Parkinsonism, unspecified
G22	G22 Parkinsonism in diseases classified elsewhere
G23	G23 Other degenerative diseases of basal ganglia
G230	G23.0 Hallervorden-Spatz disease
G231	G23.1 Progressive supranuclear ophthalmoplegia [Steele-Richardson-Olszewski]
G232	G23.2 Striatonigral degeneration
G233	G23.3 Multiple system atrophy, cerebellar type
G238	G23.8 Other specified degenerative diseases of basal ganglia
G239	G23.9 Degenerative disease of basal ganglia, unspecified
G30	G30 Alzheimer's disease
G300	G30.0 Alzheimer's disease with early onset
G301	G30.1 Alzheimer's disease with late onset
G308	G30.8 Other Alzheimer's disease
G309	G30.9 Alzheimer's disease, unspecified
G31	G31 Other degenerative diseases of nervous system, not elsewhere classified
G310	G31.0 Circumscribed brain atrophy
G311	G31.1 Senile degeneration of brain, not elsewhere classified
G312	G31.2 Degeneration of nervous system due to alcohol
G318	G31.8 Other specified degenerative diseases of nervous system
G319	G31.9 Degenerative disease of nervous system, unspecified
G35	G35 Multiple sclerosis
G36	G36 Other acute disseminated demyelination
G360	G36.0 Neuromyelitis optica [Devic]
G361	G36.1 Acute and subacute haemorrhagic leukoencephalitis [Hurst]
G368	G36.8 Other specified acute disseminated demyelination
G369	G36.9 Acute disseminated demyelination, unspecified
G37	G37 Other demyelinating diseases of central nervous system
G370	G37.0 Diffuse sclerosis
G371	G37.1 Central demyelination of corpus callosum
G372	G37.2 Central pontine myelinolysis
G373	G37.3 Acute transverse myelitis in demyelinating disease of central nervous system
G374	G37.4 Subacute necrotising myelitis
G375	G37.5 Concentric sclerosis [Balo]
G378	G37.8 Other specified demyelinating diseases of central nervous system
G379	G37.9 Demyelinating disease of central nervous system, unspecified
G45	G45 Transient cerebral ischaemic attacks and related syndromes
G450	G45.0 Vertebro-basilar artery syndrome
G451	G45.1 Carotid artery syndrome (hemispheric)
G452	G45.2 Multiple and bilateral precerebral artery syndromes
G453	G45.3 Amaurosis fugax
G454	G45.4 Transient global amnesia
G458	G45.8 Other transient cerebral ischaemic attacks and related syndromes
G459	G45.9 Transient cerebral ischaemic attack, unspecified
G46	G46 Vascular syndromes of brain in cerebrovascular diseases
G460	G46.0 Middle cerebral artery syndrome
G461	G46.1 Anterior cerebral artery syndrome
G462	G46.2 Posterior cerebral artery syndrome
G463	G46.3 Brain stem stroke syndrome
G464	G46.4 Cerebellar stroke syndrome
G465	G46.5 Pure motor lacunar syndrome
G466	G46.6 Pure sensory lacunar syndrome
G467	G46.7 Other lacunar syndromes
G468	G46.8 Other vascular syndromes of brain in cerebrovascular diseases
G80	G80 Infantile cerebral palsy
G800	G80.0 Spastic cerebral palsy
G801	G80.1 Spastic diplegia
G802	G80.2 Infantile hemiplegia
G803	G80.3 Dyskinetic cerebral palsy
G804	G80.4 Ataxic cerebral palsy
G808	G80.8 Other infantile cerebral palsy
G809	G80.9 Infantile cerebral palsy, unspecified
G81	G81 Hemiplegia
G810	G81.0 Flaccid hemiplegia
G811	G81.1 Spastic hemiplegia
G819	G81.9 Hemiplegia, unspecified
G82	G82 Paraplegia and tetraplegia
G820	G82.0 Flaccid paraplegia
G821	G82.1 Spastic paraplegia
G822	G82.2 Paraplegia, unspecified
G823	G82.3 Flaccid tetraplegia
G824	G82.4 Spastic tetraplegia
G825	G82.5 Tetraplegia, unspecified
G83	G83 Other paralytic syndromes
G830	G83.0 Diplegia of upper limbs
G831	G83.1 Monoplegia of lower limb
G832	G83.2 Monoplegia of upper limb
G833	G83.3 Monoplegia, unspecified
G834	G83.4 Cauda equina syndrome
G835	G83.5 Locked-in syndrome
G836	G83.6 Upper motor neuron facial paralysis
G838	G83.8 Other specified paralytic syndromes
G839	G83.9 Paralytic syndrome, unspecified
G90	G90 Disorders of autonomic nervous system
G900	G90.0 Idiopathic peripheral autonomic neuropathy
G901	G90.1 Familial dysautonomia [Riley-Day]
G902	G90.2 Horner's syndrome
G903	G90.3 Multisystem degeneration
G904	G90.4 Autonomic dysreflexia
G905	G90.5 Complex regional pain syndrome type I
G906	G90.6 Complex regional pain syndrome type II
G907	G90.7 Complex regional pain syndrome, other and unspecified type
G908	G90.8 Other disorders of autonomic nervous system
G909	G90.9 Disorder of autonomic nervous system, unspecified
G91	G91 Hydrocephalus
G910	G91.0 Communicating hydrocephalus
G911	G91.1 Obstructive hydrocephalus
G912	G91.2 Normal-pressure hydrocephalus
G913	G91.3 Posttraumatic hydrocephalus, unspecified
G918	G91.8 Other hydrocephalus
G919	G91.9 Hydrocephalus, unspecified
G92	G92 Toxic encephalopathy
G93	G93 Other disorders of brain
G930	G93.0 Cerebral cysts
G931	G93.1 Anoxic brain damage, not elsewhere classified
G932	G93.2 Benign intracranial hypertension
G933	G93.3 Postviral fatigue syndrome
G934	G93.4 Encephalopathy, unspecified
G935	G93.5 Compression of brain
G936	G93.6 Cerebral oedema
G937	G93.7 Reye's syndrome
G938	G93.8 Other specified disorders of brain
G939	G93.9 Disorder of brain, unspecified
G94	G94 Other disorders of brain in diseases classified elsewhere
G940	G94.0 Hydrocephalus in infectious and parasitic diseases classified elsewhere
G941	G94.1 Hydrocephalus in neoplastic disease
G942	G94.2 Hydrocephalus in other diseases classified elsewhere
G943	G94.3 Encephalopathy in diseases classified elsewhere
G948	G94.8 Other specified disorders of brain in diseases classified elsewhere
G96	G96 Other disorders of central nervous system
G960	G96.0 Cerebrospinal fluid leak
G961	G96.1 Disorders of meninges, not elsewhere classified
G968	G96.8 Other specified disorders of central nervous system
G969	G96.9 Disorder of central nervous system, unspecified
G97	G97 Postprocedural disorders of nervous system, not elsewhere classified
G970	G97.0 Cerebrospinal fluid leak from spinal puncture
G971	G97.1 Other reaction to spinal and lumbar puncture
G972	G97.2 Intracranial hypotension following ventricular shunting
G978	G97.8 Other postprocedural disorders of nervous system
G979	G97.9 Postprocedural disorder of nervous system, unspecified
G98	G98 Other disorders of nervous system, not elsewhere classified

## Sheet: Supplementary Table 2
Supplementary Table 2 : Selected Cognitive Tests and Related Cognitive Domains
Test	Test Description	Used measure	Cognitive Domains
Reaction Time	This category contains data on a test to assess reaction time and is based on 12 rounds of the card-game 'Snap'. The participant is shown two cards at a time; if both cards are the same, they press a button-box that is on the table in front of them as quickly as possible. For each of the 12 rounds, the following data were collected: the pictures shown on the cards (Index of card A, Index of card …	Mean time to correctly identify matches in reaction time	EF
Fluid Intelligence	This category contains data on questions designed to assess 'Fluid intelligence' (i.e. the capacity to solve problems that require logic and reasoning ability, independent of acquired knowledge). The participant has 2 minutes to complete as many questions as possible from the test.	Fluid intelligence score	RF
Pairs Matching	This category contains data on 'pairs' matching tests. Participants are asked to memorise the position of as many matching pairs of cards as possible. The cards are then turned face down on the screen and the participant is asked to touch as many pairs as possible in the fewest tries.	Incorrect number from 6 pairs of cards in pairs matching	WM, VS
	Multiple rounds were conducted. The first round used 3 pairs of cards and the second 6 pairs of cards. In the pilot phase an additional (i.e. third) round was conducted using 6 pairs of cards. however this was dropped from the main study as the extra set of results were very similar to the second and not felt to add significant new information.
Trail Making Test (A&B)	The participant was presented with sets of digits/letters in circles scattered around the screen and asked to click on them sequentially according to a specific algorithm.	Duration of completion	EF, WM
Numeric Memory	This category contains data on a test designed to assess numeric short-term memory, as part of the touchscreen questionnaire. The participant was shown a 2-digit number to remember. The number then disappeared and after a short while they were asked to enter the number onto the screen. The number became one digit longer each time they remembered correctly (up to a maximum of 12 digits). Data coll…	Maximum digits remembered correctly	WM
Symbol Digit Substitution	The participant was presented with one grid linking symbols to single-digit integers and a second grid containing only the symbols. They were then asked to indicate the numbers attached to each of the symbols in the second grid using the first one as a key.	Correct number in symbol-digit substitution	EF
Tower Rearranging	The participant was presented with an illustration of three pegs (towers) on which three differently-coloured hoops had been placed. The were then asked to indicate how many moves it would take to re-arrange the hoops into another specific position.	Number of puzzles correctly solved	RF, VS
Matrix Pattern Completion	The participant was presented with a series of matrix pattern blocks with an element missing and asked to select the element that best completed the pattern from a range of displayed choices.	Number of puzzles correctly solved	RF, VS
Cognitive domains: Executive function (EF); Working memory (WM); Visuospatial Function (VS); Reasoning function (RF)

## Sheet: Supplementary Table 3
Supplementary Table 3: Participant characteristics of UKB-CC
Characteristic	Low, N = 1,4961	Intermediate, N = 1,4961	High, N = 1,4951	p-value2	Overall, N = 4,4871
BMI	26.70(4.34)	26.57(4.36)	26.60(4.63)	0.7	26.62(4.44)
Age	64.86(7.74)	64.59(7.75)	64.16(7.68)	0.045	64.54(7.73)
Sex				0.2
Female	815 (54%)	839 (56%)	786 (53%)		2,440 (54%)
Male	681 (46%)	657 (44%)	709 (47%)		2,047 (46%)
Townsend index	-2.11(2.52)	-1.91(2.62)	-1.86(2.68)	0.02	-1.96(2.61)
Education score	12.12(13.31)	13.40(13.84)	14.04(14.64)	<0.001	13.19(13.96)
Hypertensive	521 (35%)	472 (32%)	495 (33%)	0.2	1,488 (33%)
Diabetic	88 (5.9%)	90 (6.0%)	84 (5.6%)	0.9	262 (5.8%)
ApoE				<0.001
e1e3	7 (0.5%)	33 (2.2%)	67 (4.5%)		107 (2.4%)
e2e2	20 (1.3%)	4 (0.3%)	1 (<0.1%)		25 (0.6%)
e2e3	316 (21%)	207 (14%)	43 (2.9%)		566 (13%)
e3e3	1,114 (74%)	1,111 (74%)	419 (28%)		2,644 (59%)
e3e4	39 (2.6%)	140 (9.4%)	870 (58%)		1,049 (23%)
e4e4	0 (0%)	1 (<0.1%)	95 (6.4%)		96 (2.1%)
Genetic risk score	-0.95(0.39)	-0.09(0.22)	1.14(0.66)	<0.001	0.03(0.97)
Cortical GMV	617.79(41.55)	619.32(41.37)	620.49(41.51)	0.2	619.20(41.48)
Subcortical GMV	173.99(14.80)	174.76(14.48)	175.76(14.82)	0.004	174.84(14.71)
WMV	700.98(41.43)	701.89(41.44)	702.85(39.87)	0.5	701.91(40.92)
ventricular CSFV	46.40(19.47)	46.23(19.87)	45.89(19.51)	0.8	46.17(19.61)
WMHV	6.40(7.77)	6.20(7.00)	6.34(8.11)	0.8	6.31(7.63)
Missing	55	33	44		132
Executive function	0.04(0.82)	0.06(0.82)	0.03(0.82)	0.5	0.04(0.82)
Missing	72	108	87		267
Memory	0.04(0.75)	0.06(0.76)	0.01(0.75)	0.2	0.04(0.76)
Missing	72	108	87		267
Visuospatial function	0.00(0.59)	0.01(0.60)	0.03(0.60)	0.6	0.01(0.60)
Missing	72	108	87		267
Reasoning function	0.04(0.82)	0.06(0.83)	0.01(0.82)	0.3	0.04(0.82)
Missing	72	108	87		267
1Mean(SD); n (%)
2One-way ANOVA; Pearson's Chi-squared test

## Sheet: Supplementary Table 4
Supplementary Table 4: Participant characteristics of UKB-MIX
Characteristic	Low, N = 1,3081	Intermediate, N = 1,3071	High, N = 1,3071	p-value2	Overall, N = 3,9221
BMI	26.50(4.41)	26.55(4.32)	26.41(4.41)	0.7	26.49(4.38)
Age	62.83(7.97)	63.31(7.91)	62.92(7.59)	0.3	63.02(7.83)
Sex				0.8
Female	716 (55%)	703 (54%)	721 (55%)		2,140 (55%)
Male	592 (45%)	604 (46%)	586 (45%)		1,782 (45%)
Townsend index	-0.87(3.07)	-1.17(3.08)	-1.04(3.05)	0.045	-1.03(3.07)
Education score	12.65(14.59)	12.45(14.55)	11.72(13.43)	0.2	12.27(14.20)
Hypertensive	410 (31%)	398 (30%)	392 (30%)	0.7	1,200 (31%)
Diabetic	108 (8.3%)	103 (7.9%)	91 (7.0%)	0.4	302 (7.7%)
ApoE				<0.001
e1e3	16 (1.2%)	11 (0.8%)	42 (3.2%)		69 (1.8%)
e2e2	13 (1.0%)	8 (0.6%)	1 (<0.1%)		22 (0.6%)
e2e3	243 (19%)	143 (11%)	58 (4.4%)		444 (11%)
e3e3	996 (76%)	1,008 (77%)	451 (35%)		2,455 (63%)
e3e4	39 (3.0%)	130 (9.9%)	688 (53%)		857 (22%)
e4e4	1 (<0.1%)	7 (0.5%)	67 (5.1%)		75 (1.9%)
Genetic risk score	-0.97(0.41)	-0.09(0.22)	1.12(0.71)	<0.001	0.02(0.99)
Cortical GMV	620.36(39.90)	619.51(40.73)	621.53(40.73)	0.4	620.47(40.46)
Subcortical GMV	174.90(13.85)	174.22(14.37)	175.47(13.79)	0.072	174.86(14.01)
WMV	703.02(43.11)	702.42(41.32)	702.93(41.51)	>0.9	702.79(41.98)
ventricular CSFV	44.80(18.58)	44.87(18.82)	44.78(19.63)	>0.9	44.82(19.01)
WMHV	5.54(7.05)	5.67(7.40)	5.66(6.93)	0.9	5.62(7.13)
Missing	62	42	46		150
Executive function	-0.08(0.90)	-0.05(0.88)	-0.10(0.90)	0.5	-0.07(0.89)
Missing	89	93	93		275
Memory	-0.12(0.83)	-0.10(0.81)	-0.10(0.84)	0.7	-0.11(0.83)
Missing	89	93	93		275
Visuospatial function	0.00(0.62)	0.00(0.61)	-0.05(0.61)	0.064	-0.01(0.62)
Missing	89	93	93		275
Reasoning function	-0.14(0.90)	-0.13(0.89)	-0.13(0.91)	>0.9	-0.13(0.90)
Missing	89	93	93		275
1Mean(SD); n (%)
2One-way ANOVA; Pearson's Chi-squared test

## Sheet: Supplementary Table 5
Supplementary Table 5: Tract-wise statistics of the relationship between IARD and age
		Sliding Window Approach					Linear Models
Measure	IDP	ρ(Rsq)	BPS(SE)	BLS(SE)	EOA	Z	βPRS	βPRS*age	β(PSE)PRS	β(PSE)PRS*age	β(LSE)PRS	β(LSE)PRS*age
mean_fa	anterior limb of internal capsule (R)	0.87(0.77)****	7.52e-05(4.54e-06)****	2.43e-04(6.87e-06)****	58.2	20.44****	0.051(0.058)(NS)	-0.062(0.058)(NS)	-0.071(0.13)(NS)	0.069(0.13)(NS)	0.24(0.36)(NS)	-0.26(0.36)(NS)
mean_fa	cingulum hippocampus (L)	0.96(0.92)****	3.39e-04(6.96e-06)****	1.71e-03(3.39e-05)****	56.5	39.44****	0.13(0.059)(NS)	-0.15(0.059)(NS)	0.088(0.13)(NS)	-0.098(0.13)(NS)	0.69(0.37)(NS)	-0.74(0.37)(NS)
mean_fa	cingulum hippocampus (R)	0.83(0.76)****	3.10e-04(7.39e-06)****	8.62e-04(2.94e-05)****	55.5	18.24****	0.075(0.059)(NS)	-0.097(0.059)(NS)	0.055(0.13)(NS)	-0.069(0.13)(NS)	0.25(0.37)(NS)	-0.29(0.37)(NS)
mean_fa	fornix cres+stria terminalis (L)	0.87(0.83)****	5.07e-04(5.88e-06)****	1.71e-03(4.25e-05)****	60.5	28.02****	0.13(0.052)(NS)	-0.15(0.052)(NS)	0.12(0.12)(NS)	-0.12(0.12)(NS)	0.85(0.36)(NS)	-0.88(0.36)(NS)
mean_fa	fornix cres+stria terminalis (R)	0.87(0.83)****	7.19e-04(5.57e-06)****	1.64e-03(4.85e-05)****	58.7	18.92****	0.15(0.053)(NS)	-0.17(0.053)*	0.18(0.13)(NS)	-0.18(0.13)(NS)	0.74(0.36)(NS)	-0.78(0.36)(NS)
mean_fa	fornix	0.96(0.93)****	6.45e-04(1.89e-05)****	4.21e-03(8.34e-05)****	60.4	41.73****	0.14(0.051)(NS)	-0.16(0.051)*	0.077(0.12)(NS)	-0.08(0.12)(NS)	0.58(0.35)(NS)	-0.63(0.35)(NS)
mean_fa	posterior corona radiata (L)	-0.86(0.56)****	-1.43e-04(5.08e-06)****	5.48e-05(2.45e-05)*	69.3	7.91****	-5.43e-03(0.059)(NS)	-1.73e-03(0.059)(NS)	0.043(0.13)(NS)	-0.053(0.13)(NS)	0.3(0.37)(NS)	-0.3(0.37)(NS)
mean_fa	posterior corona radiata (R)	-0.82(0.75)****	-9.76e-05(5.13e-06)****	-6.57e-04(2.10e-05)****	73.2	-25.86****	-0.024(0.06)(NS)	0.012(0.06)(NS)	-0.043(0.13)(NS)	0.033(0.13)(NS)	-0.11(0.37)(NS)	0.1(0.37)(NS)
mean_fa	posterior limb of internal capsule (L)	-0.82(0.89)****	4.60e-05(4.27e-06)****	-5.23e-04(1.04e-05)****	68.2	-50.39****	-0.024(0.059)(NS)	0.027(0.059)(NS)	0.11(0.13)(NS)	-0.11(0.13)(NS)	-0.24(0.36)(NS)	0.26(0.36)(NS)
mean_fa	retrolenticular part of internal capsule (R)	-0.81(0.88)****	8.76e-05(6.07e-06)****	6.18e-06(1.38e-05)(NS)	69	-5.41****	-0.09(0.059)(NS)	0.08(0.059)(NS)	0.025(0.13)(NS)	-0.046(0.13)(NS)	0.31(0.37)(NS)	-0.3(0.37)(NS)
mean_fa	superior corona radiata (L)	-0.97(0.91)****	-3.26e-04(5.30e-06)****	-3.53e-04(1.48e-05)****	64.4	-1.75(NS)	-0.09(0.058)(NS)	0.091(0.058)(NS)	-0.025(0.13)(NS)	0.015(0.13)(NS)	-1.36e-03(0.37)(NS)	0.017(0.37)(NS)
mean_fa	superior corona radiata (R)	-0.97(0.9)****	-2.07e-04(4.02e-06)****	-6.30e-04(1.53e-05)****	65.7	-26.8****	-0.054(0.059)(NS)	0.058(0.058)(NS)	-0.11(0.13)(NS)	0.11(0.13)(NS)	-0.16(0.37)(NS)	0.17(0.37)(NS)
mean_fa	superior fronto-occipital fasciculus (R)	0.83(0.84)****	4.11e-04(1.47e-05)****	2.14e-03(3.45e-05)****	68.3	45.95****	0.074(0.057)(NS)	-0.084(0.057)(NS)	0.046(0.13)(NS)	-0.048(0.13)(NS)	0.62(0.36)(NS)	-0.64(0.36)(NS)
mean_icvf	cerebral peduncle (R)	0.82(0.93)****	2.79e-04(4.96e-06)****	1.18e-03(1.52e-05)****	69.5	56.13****	0.13(0.058)(NS)	-0.13(0.058)(NS)	0.1(0.13)(NS)	-0.094(0.13)(NS)	0.95(0.36)(NS)	-0.97(0.36)(NS)
mean_icvf	cingulum hippocampus (L)	0.95(0.9)****	2.92e-04(6.39e-06)****	9.24e-04(2.14e-05)****	56.2	28.37****	0.12(0.059)(NS)	-0.15(0.059)(NS)	0.14(0.13)(NS)	-0.15(0.13)(NS)	0.47(0.36)(NS)	-0.51(0.36)(NS)
mean_icvf	fornix	0.81(0.7)****	5.48e-04(1.09e-05)****	2.91e-03(9.88e-05)****	59.2	23.81****	0.15(0.059)(NS)	-0.17(0.059)(NS)	0.1(0.13)(NS)	-0.1(0.13)(NS)	0.78(0.37)(NS)	-0.81(0.37)(NS)
mean_icvf	superior fronto-occipital fasciculus (R)	0.89(0.9)****	2.06e-04(8.23e-06)****	3.27e-03(6.28e-05)****	56.9	48.35****	0.13(0.054)(NS)	-0.15(0.054)(NS)	0.052(0.13)(NS)	-0.062(0.13)(NS)	1.08(0.36)(NS)	-1.12(0.36)(NS)
mean_isovf	cerebral peduncle (L)	0.85(0.76)****	3.23e-04(2.22e-05)****	1.47e-03(3.97e-05)****	73.9	25.33****	0.013(0.06)(NS)	2.62e-04(0.06)(NS)	0.033(0.13)(NS)	-0.021(0.13)(NS)	0.052(0.37)(NS)	-0.038(0.37)(NS)
mean_isovf	cerebral peduncle (R)	0.89(0.81)****	4.74e-04(2.42e-05)****	2.07e-03(7.23e-05)****	70.6	20.98****	0.042(0.06)(NS)	-0.038(0.06)(NS)	-0.021(0.13)(NS)	0.032(0.13)(NS)	0.075(0.37)(NS)	-0.075(0.37)(NS)
mean_isovf	fornix	-0.94(0.87)****	-9.07e-04(2.66e-05)****	-1.95e-03(6.03e-05)****	61.1	-15.9****	-0.11(0.05)(NS)	0.13(0.05)(NS)	-0.13(0.12)(NS)	0.13(0.12)(NS)	-0.36(0.35)(NS)	0.4(0.35)(NS)
mean_isovf	genu of corpus callosum	-0.8(0.86)****	-2.84e-03(4.61e-05)****	-5.18e-03(1.21e-04)****	58.4	-18.12****	-0.14(0.055)(NS)	0.15(0.055)(NS)	-0.34(0.13)(NS)	0.34(0.13)(NS)	-0.39(0.36)(NS)	0.43(0.36)(NS)
mean_isovf	splenium of corpus callosum	-0.89(0.79)****	-3.15e-04(2.60e-05)****	-1.98e-03(5.39e-05)****	62.3	-27.82****	-0.096(0.057)(NS)	0.1(0.057)(NS)	-0.075(0.12)(NS)	0.072(0.12)(NS)	-0.17(0.36)(NS)	0.19(0.36)(NS)
mean_isovf	tapetum (R)	-0.84(0.61)****	-6.01e-04(5.94e-05)****	-1.49e-03(1.06e-04)****	67.8	-7.31****	-0.028(0.058)(NS)	0.038(0.058)(NS)	0.039(0.13)(NS)	-0.034(0.13)(NS)	-0.29(0.37)(NS)	0.31(0.37)(NS)
mean_isovf	uncinate fasciculus (R)	-0.87(0.78)****	-2.40e-03(7.20e-05)****	2.25e-03(4.03e-04)****	63.9	11.35****	-0.19(0.06)(NS)	0.2(0.06)*	-0.083(0.13)(NS)	0.07(0.13)(NS)	0.038(0.37)(NS)	-5.28e-04(0.37)(NS)
mean_md	cingulum hippocampus (L)	-0.89(0.84)****	-6.08e-05(5.41e-06)****	-9.68e-04(2.28e-05)****	55.7	-38.75****	-0.11(0.059)(NS)	0.13(0.059)(NS)	-0.02(0.13)(NS)	0.031(0.13)(NS)	-0.99(0.37)(NS)	1.03(0.37)(NS)
mean_md	fornix cres+stria terminalis (L)	0.16(0.73)****	-2.75e-04(8.48e-06)****	-2.55e-03(7.24e-05)****	64.6	-31.18****	-0.051(0.055)(NS)	0.056(0.055)(NS)	-0.15(0.12)(NS)	0.16(0.12)(NS)	-1.22(0.36)*	1.22(0.36)*
mean_md	fornix	-0.93(0.87)****	-1.08e-03(2.22e-05)****	-3.13e-03(7.40e-05)****	60.6	-26.5****	-0.13(0.052)(NS)	0.15(0.052)(NS)	-0.12(0.12)(NS)	0.13(0.12)(NS)	-0.64(0.36)(NS)	0.69(0.36)(NS)
mean_md	retrolenticular part of internal capsule (L)	0.86(0.82)****	1.29e-05(4.05e-06)**	1.79e-04(1.32e-05)****	64.8	12.01****	0.059(0.059)(NS)	-0.058(0.059)(NS)	-0.089(0.13)(NS)	0.1(0.13)(NS)	-0.11(0.37)(NS)	0.09(0.37)(NS)
mean_md	retrolenticular part of internal capsule (R)	0.9(0.86)****	9.14e-05(3.86e-06)****	-2.65e-05(1.46e-05)(NS)	68.3	-7.83****	0.049(0.058)(NS)	-0.04(0.058)(NS)	-0.063(0.13)(NS)	0.082(0.13)(NS)	-0.26(0.36)(NS)	0.26(0.36)(NS)
mean_md	superior fronto-occipital fasciculus (R)	-0.89(0.92)****	-1.58e-04(6.97e-06)****	-2.57e-03(4.26e-05)****	57.7	-55.98****	-0.13(0.053)(NS)	0.15(0.053)(NS)	0.041(0.13)(NS)	-0.036(0.13)(NS)	-0.83(0.36)(NS)	0.87(0.36)(NS)
mean_md	tapetum (R)	-0.83(0.61)****	-2.17e-04(1.67e-05)****	-1.03e-03(4.70e-05)****	61.3	-16.35****	-0.066(0.056)(NS)	0.083(0.056)(NS)	6.48e-03(0.13)(NS)	1.39e-03(0.13)(NS)	-0.48(0.37)(NS)	0.51(0.37)(NS)
mean_mo	body of corpus callosum	0.81(0.92)****	8.24e-05(3.58e-06)****	1.59e-03(2.68e-05)****	58.3	55.93****	0.086(0.056)(NS)	-0.099(0.056)(NS)	0.053(0.13)(NS)	-0.061(0.13)(NS)	0.87(0.36)(NS)	-0.9(0.36)(NS)
mean_mo	cerebral peduncle (R)	0.87(0.76)****	5.30e-05(3.59e-06)****	1.05e-04(9.79e-06)****	63.6	4.97****	0.073(0.059)(NS)	-0.079(0.059)(NS)	-0.027(0.13)(NS)	0.034(0.13)(NS)	-0.27(0.37)(NS)	0.25(0.37)(NS)
mean_mo	cingulum hippocampus (R)	-0.53(0.64)****	4.51e-04(1.71e-05)****	-7.64e-04(3.17e-05)****	64.4	-33.74****	-0.062(0.06)(NS)	0.07(0.06)(NS)	0.13(0.13)(NS)	-0.13(0.13)(NS)	-1.11(0.37)*	1.13(0.37)*
mean_mo	corticospinal tract (L)	0.87(0.8)****	9.89e-04(2.81e-05)****	2.83e-03(7.90e-05)****	66.2	22.01****	0.13(0.06)(NS)	-0.13(0.06)(NS)	0.072(0.13)(NS)	-0.056(0.13)(NS)	-0.17(0.37)(NS)	0.14(0.37)(NS)
mean_mo	fornix cres+stria terminalis (L)	0.95(0.88)****	7.37e-04(1.65e-05)****	5.07e-04(6.79e-05)****	63.7	-3.29**	0.063(0.056)(NS)	-0.076(0.056)(NS)	1.51e-04(0.13)(NS)	-3.42e-03(0.13)(NS)	-0.39(0.37)(NS)	0.36(0.37)(NS)
mean_mo	fornix cres+stria terminalis (R)	0.87(0.87)****	1.54e-03(2.13e-05)****	4.60e-04(6.65e-05)****	60.5	-15.42****	0.13(0.057)(NS)	-0.15(0.057)(NS)	0.069(0.13)(NS)	-0.066(0.13)(NS)	-0.42(0.37)(NS)	0.37(0.37)(NS)
mean_mo	fornix	0.87(0.88)****	9.22e-04(1.75e-05)****	6.33e-03(1.13e-04)****	61.5	47.11****	0.17(0.058)(NS)	-0.19(0.058)(NS)	0.056(0.13)(NS)	-0.048(0.13)(NS)	1.17(0.36)*	-1.21(0.36)*
mean_mo	genu of corpus callosum	0.84(0.89)****	7.23e-05(3.01e-06)****	1.20e-03(2.01e-05)****	69.2	55.46****	0.037(0.06)(NS)	-0.049(0.06)(NS)	-0.11(0.13)(NS)	0.11(0.13)(NS)	0.77(0.37)(NS)	-0.79(0.37)(NS)
mean_mo	superior fronto-occipital fasciculus (R)	0.41(0.84)****	8.58e-04(1.32e-05)****	7.46e-03(1.25e-04)****	58.1	52.49****	0.11(0.06)(NS)	-0.11(0.06)(NS)	0.23(0.13)(NS)	-0.23(0.13)(NS)	1.13(0.37)*	-1.14(0.37)*
mean_mo	uncinate fasciculus (L)	0.8(0.67)****	2.91e-04(3.52e-05)****	7.48e-04(3.57e-05)****	67.4	9.12****	0.11(0.06)(NS)	-0.1(0.06)(NS)	-0.13(0.13)(NS)	0.16(0.13)(NS)	0.42(0.37)(NS)	-0.43(0.37)(NS)
mean_od	cerebral peduncle (L)	0.92(0.78)****	2.22e-04(9.50e-06)****	3.83e-04(4.89e-05)****	68.6	3.22**	0.082(0.059)(NS)	-0.076(0.059)(NS)	1.88e-03(0.13)(NS)	0.014(0.13)(NS)	0.22(0.37)(NS)	-0.23(0.37)(NS)
mean_od	cingulum hippocampus (L)	-0.9(0.8)****	-6.13e-04(1.59e-05)****	-1.84e-03(5.07e-05)****	60.6	-23.06****	-0.064(0.059)(NS)	0.071(0.059)(NS)	-0.061(0.13)(NS)	0.062(0.13)(NS)	-0.18(0.37)(NS)	0.2(0.37)(NS)
mean_od	fornix cres+stria terminalis (L)	-0.93(0.89)****	-4.67e-04(1.63e-05)****	-3.41e-03(8.06e-05)****	65.7	-35.75****	-0.066(0.056)(NS)	0.08(0.056)(NS)	0.089(0.13)(NS)	-0.087(0.13)(NS)	-0.37(0.37)(NS)	0.39(0.37)(NS)
mean_od	fornix cres+stria terminalis (R)	-0.92(0.87)****	-1.27e-03(2.33e-05)****	-2.99e-03(9.29e-05)****	63.6	-17.97****	-0.14(0.057)(NS)	0.16(0.057)(NS)	0.061(0.13)(NS)	-0.071(0.13)(NS)	-0.46(0.37)(NS)	0.49(0.37)(NS)
mean_od	fornix	-0.89(0.88)****	-7.09e-03(1.24e-04)****	-0.02(3.83e-04)****	67.8	-32.93****	-0.15(0.057)(NS)	0.17(0.057)(NS)	-0.09(0.13)(NS)	0.085(0.13)(NS)	-0.89(0.36)(NS)	0.92(0.36)(NS)
mean_od	posterior limb of internal capsule (L)	0.86(0.69)****	5.25e-04(1.69e-05)****	1.53e-03(5.75e-05)****	65.1	16.69****	0.026(0.06)(NS)	-0.034(0.06)(NS)	-0.072(0.13)(NS)	0.07(0.13)(NS)	0.58(0.37)(NS)	-0.59(0.37)(NS)
mean_od	posterior limb of internal capsule (R)	0.81(0.59)****	5.01e-04(1.43e-05)****	6.86e-04(6.04e-05)****	66.3	2.99**	0.046(0.06)(NS)	-0.051(0.06)(NS)	0.06(0.13)(NS)	-0.06(0.13)(NS)	0.35(0.37)(NS)	-0.36(0.37)(NS)
mean_od	posterior thalamic radiation (L)	-0.81(0.91)****	-3.91e-04(1.82e-05)****	-4.38e-03(6.42e-05)****	68.5	-59.89****	-0.066(0.059)(NS)	0.072(0.059)(NS)	-0.082(0.13)(NS)	0.087(0.13)(NS)	-0.83(0.37)(NS)	0.85(0.37)(NS)
mean_od	sagittal stratum (R)	-0.82(0.65)****	-3.23e-04(1.49e-05)****	-5.40e-04(4.76e-05)****	67.4	-4.35****	-0.032(0.059)(NS)	0.027(0.059)(NS)	-0.051(0.13)(NS)	0.043(0.13)(NS)	-0.16(0.37)(NS)	0.16(0.37)(NS)
mean_od	superior corona radiata (L)	0.93(0.83)****	3.98e-04(9.59e-06)****	1.12e-03(4.16e-05)****	61.2	17.02****	0.11(0.06)(NS)	-0.13(0.06)(NS)	-0.042(0.13)(NS)	0.046(0.13)(NS)	0.26(0.37)(NS)	-0.3(0.37)(NS)
mean_od	superior corona radiata (R)	0.95(0.9)****	3.70e-04(9.57e-06)****	2.01e-03(4.39e-05)****	63.9	36.37****	0.13(0.06)(NS)	-0.15(0.06)(NS)	0.12(0.13)(NS)	-0.12(0.13)(NS)	0.46(0.37)(NS)	-0.5(0.37)(NS)
****' for p < .0001, '***' for p < .001, '**' for p < .01, and '*' for p < .05; FDR corrected

## Sheet: Supplementary Table 6
Supplementary Table 6: Moderated mediation of GM components
marker_type	marker_label	cognition	a1_estimate	a1_se	a1_p	a2_estimate	a2_se	a2_p	a3_estimate	a3_se	a3_p	b1_estimate	b1_se	b1_p	b2_estimate	b2_se	b2_p	b3_estimate	b3_se	b3_p	cprime_estimate	cprime_se	cprime_p	c_estimate	c_se	c_p	med_acme	med_acme_low	med_acme_up	med_acme_p	med_ade	med_ade_low	med_ade_up	med_ade_p	med_total	med_total_low	med_total_up	med_total_p	med_low_W_acme	med_low_W_acme_low	med_low_W_acme_up	med_low_W_acme_p	med_low_W_ade	med_low_W_ade_low	med_low_W_ade_up	med_low_W_ade_p	med_low_W_total	med_low_W_total_low	med_low_W_total_up
GM_normalised	hipp-thal	Executive function	-0.028719	0.00652615	1.0851e-05	-0.0535919	0.000849268	0	-0.00306443	0.000866077	0.00040365	0.0491562	0.00721636	9.91309e-12	-0.0441254	0.000950313	0	-0.00155836	0.000885518	0.0784529	-0.0360164	0.00667378	6.86453e-08	-0.0282845	0.00714014	7.47881e-05	-0.00141172	-0.00228556	-0.000730056	0	-0.0360164	-0.0495101	-0.0223538	0	-0.0374281	-0.0509082	-0.0237258	0	-0.000267733	-0.00120128	0.00056728	0.5384	-0.0241817	-0.0422617	-0.00591654	0.0092	-0.0244494	-0.0427103	-0.00635994
GM_normalised	hipp-thal	Memory	-0.028719	0.00652615	1.0851e-05	-0.0535919	0.000849268	0	-0.00306443	0.000866077	0.00040365	0.00357577	0.00755551	0.636028	-0.0274534	0.000994976	1.62389e-164	-0.00168399	0.000927135	0.0693335	-0.0358473	0.00698743	2.9204e-07	-0.0304492	0.00713969	2.01016e-05	-0.000102692	-0.00059385	0.000294547	0.6262	-0.0358473	-0.0494198	-0.0222728	0	-0.03595	-0.0494906	-0.0222984	0	-1.94757e-05	-0.000359448	6.67394e-05	0.818	-0.0230585	-0.0420577	-0.00405767	0.0186	-0.023078	-0.0420552	-0.00406756
GM_normalised	hipp-thal	Visuospatial function	-0.028719	0.00652615	1.0851e-05	-0.0535919	0.000849268	0	-0.00306443	0.000866077	0.00040365	0.0595847	0.00741371	9.7052e-16	-0.0334844	0.000976303	1.44016e-250	-9.02116e-05	0.000909735	0.92101	-0.0139617	0.0068563	0.0417302	-0.00864893	0.00714267	0.225955	-0.00171121	-0.00272529	-0.000910863	0	-0.0139617	-0.0272772	-0.000185771	0.0444	-0.0156729	-0.0291409	-0.00191297	0.0222	-0.000324532	-0.00141407	0.00066085	0.5264	-0.0132766	-0.032099	0.00518583	0.1554	-0.0136011	-0.0324376	0.00497604
GM_normalised	hipp-thal	Reasoning function	-0.028719	0.00652615	1.0851e-05	-0.0535919	0.000849268	0	-0.00306443	0.000866077	0.00040365	0.00850629	0.00752803	0.258512	-0.0292857	0.000991357	8.86665e-188	-0.00141076	0.000923763	0.12673	-0.0358604	0.00696202	2.61744e-07	-0.0302403	0.00713974	2.29061e-05	-0.000244292	-0.000760246	0.000139344	0.2582	-0.0358604	-0.0499062	-0.0220892	0	-0.0361047	-0.050093	-0.0223423	0	-4.633e-05	-0.000465129	6.82417e-05	0.6506	-0.0251466	-0.0446182	-0.00578023	0.0126	-0.0251929	-0.0446907	-0.00585446
GM_normalised	parahipp	Executive function	-0.0247916	0.00688927	0.000320729	-0.0348884	0.000896521	1.997e-304	-0.00282168	0.000914266	0.00202957	0.0267945	0.00684129	9.01087e-05	-0.045825	0.000900924	0	-0.00163339	0.000886137	0.0653048	-0.0367639	0.00667787	3.73004e-08	-0.0282845	0.00714014	7.47881e-05	-0.000664278	-0.00129201	-0.000263179	0.0004	-0.0367639	-0.0501363	-0.0232274	0	-0.0374281	-0.0507167	-0.0238443	0	-9.0102e-05	-0.000654918	0.000418707	0.7278	-0.0243593	-0.0423752	-0.00639196	0.0084	-0.0244494	-0.0425	-0.00644898
GM_normalised	parahipp	Memory	-0.0247916	0.00688927	0.000320729	-0.0348884	0.000896521	1.997e-304	-0.00282168	0.000914266	0.00202957	0.00969534	0.00715699	0.175539	-0.0273067	0.000942499	7.61303e-181	-0.00166759	0.000927029	0.0720565	-0.0357097	0.00698604	3.22414e-07	-0.0304492	0.00713969	2.01016e-05	-0.000240363	-0.000719993	7.03998e-05	0.1788	-0.0357097	-0.0499795	-0.0219834	0	-0.03595	-0.0501943	-0.0222453	0	-3.26026e-05	-0.000416199	0.000128796	0.7678	-0.0230453	-0.0419546	-0.00384746	0.0178	-0.023078	-0.0419951	-0.00393258
GM_normalised	parahipp	Visuospatial function	-0.0247916	0.00688927	0.000320729	-0.0348884	0.000896521	1.997e-304	-0.00282168	0.000914266	0.00202957	0.02294	0.00703239	0.00110793	-0.0358773	0.000926089	1.1017e-299	-0.000208075	0.000910889	0.819314	-0.0151042	0.00686441	0.0277926	-0.00864893	0.00714267	0.225955	-0.00056872	-0.00119177	-0.000196702	0.0028	-0.0151042	-0.0284398	-0.00188474	0.0264	-0.0156729	-0.0290131	-0.00245241	0.0212	-7.71406e-05	-0.000606178	0.000370836	0.7322	-0.013524	-0.0324626	0.00500918	0.1552	-0.0136011	-0.0325855	0.00478298
GM_normalised	parahipp	Reasoning function	-0.0247916	0.00688927	0.000320729	-0.0348884	0.000896521	1.997e-304	-0.00282168	0.000914266	0.00202957	0.00637572	0.00713133	0.37131	-0.0295191	0.00093912	9.65349e-212	-0.00141884	0.000923705	0.124548	-0.0359466	0.00696099	2.44022e-07	-0.0302403	0.00713974	2.29061e-05	-0.000158064	-0.000603975	0.00016782	0.3756	-0.0359466	-0.0498557	-0.0221658	0	-0.0361047	-0.0499877	-0.0223432	0	-2.14397e-05	-0.000358987	9.82505e-05	0.8278	-0.0251715	-0.0446346	-0.00595996	0.0108	-0.0251929	-0.0445887	-0.00597742
GM_normalised	temporal	Executive function	0.00636634	0.00679347	0.348705	-0.0408215	0.000884056	0	-0.00237785	0.000901553	0.00835844	0.0281661	0.00693756	4.92714e-05	-0.04561	0.000913704	0	-0.00164202	0.000886055	0.0638715	-0.0376075	0.00667568	1.7895e-08	-0.0282845	0.00714014	7.47881e-05	0.000179315	-0.000171177	0.000638385	0.356	-0.0376075	-0.0513553	-0.0242324	0	-0.0374281	-0.0510944	-0.0239531	0	0.000687945	0.000178769	0.00150799	0.0114	-0.0251374	-0.0434132	-0.00703881	0.007	-0.0244494	-0.0427607	-0.0063089
GM_normalised	temporal	Memory	0.00636634	0.00679347	0.348705	-0.0408215	0.000884056	0	-0.00237785	0.000901553	0.00835844	0.030546	0.00725504	2.56133e-05	-0.0263981	0.000955518	6.39405e-165	-0.00162232	0.000926603	0.0799922	-0.0361445	0.00698117	2.2714e-07	-0.0304492	0.00713969	2.01016e-05	0.000194466	-0.000197116	0.000664951	0.3472	-0.0361445	-0.0504374	-0.0225017	0	-0.03595	-0.0501911	-0.0222423	0	0.000746073	0.000188432	0.0015988	0.0104	-0.023824	-0.0425227	-0.00423509	0.017	-0.023078	-0.0418548	-0.00368775
GM_normalised	temporal	Visuospatial function	0.00636634	0.00679347	0.348705	-0.0408215	0.000884056	0	-0.00237785	0.000901553	0.00835844	0.0106681	0.00713304	0.134778	-0.0362421	0.00093945	3.84039e-298	-0.000247437	0.000911022	0.785929	-0.0157408	0.00686378	0.0218401	-0.00864893	0.00714267	0.225955	6.79166e-05	-4.30674e-05	0.000404516	0.4312	-0.0157408	-0.029003	-0.0018161	0.0284	-0.0156729	-0.0289678	-0.00178096	0.0292	0.000260563	-2.91917e-05	0.000828061	0.1406	-0.0138617	-0.0324222	0.00529351	0.1456	-0.0136011	-0.0322243	0.00549964
GM_normalised	temporal	Reasoning function	0.00636634	0.00679347	0.348705	-0.0408215	0.000884056	0	-0.00237785	0.000901553	0.00835844	0.0290021	0.00722914	6.04684e-05	-0.0285577	0.000952106	2.14041e-193	-0.00136786	0.000923294	0.138488	-0.0362893	0.00695625	1.83851e-07	-0.0302403	0.00713974	2.29061e-05	0.000184637	-0.000192603	0.000649228	0.3544	-0.0362893	-0.0503606	-0.022723	0	-0.0361047	-0.0501215	-0.022574	0	0.000708364	0.000173574	0.00155435	0.0122	-0.0259013	-0.0451969	-0.00692085	0.0096	-0.0251929	-0.0445344	-0.00612532
[truncated: 55 more columns]

## Sheet: Supplementary Table 7
Supplementary Table 6: Moderated mediation of WM components
marker_type	marker_label	cognition	a1_estimate	a1_se	a1_p	a2_estimate	a2_se	a2_p	a3_estimate	a3_se	a3_p	b1_estimate	b1_se	b1_p	b2_estimate	b2_se	b2_p	b3_estimate	b3_se	b3_p	cprime_estimate	cprime_se	cprime_p	c_estimate	c_se	c_p	med_acme	med_acme_low	med_acme_up	med_acme_p	med_ade	med_ade_low	med_ade_up	med_ade_p	med_total	med_total_low	med_total_up	med_total_p	med_low_W_acme	med_low_W_acme_low	med_low_W_acme_up	med_low_W_acme_p	med_low_W_ade	med_low_W_ade_low	med_low_W_ade_up	med_low_W_ade_p	med_low_W_total	med_low_W_total_low	med_low_W_total_up
WM_mean	RC1	Executive function	-0.0162941	0.00674959	0.015784	-0.0520426	0.000879314	0	-0.00278361	0.000897778	0.00193442	0.0870034	0.00733135	2.27725e-32	-0.0432027	0.000967024	0	-0.00109554	0.000907461	0.227346	-0.0354031	0.00682171	2.12718e-07	-0.0275634	0.00733915	0.000173397	-0.00141764	-0.00266481	-0.00025307	0.0176	-0.0354031	-0.0493094	-0.0215893	0	-0.0368207	-0.0508538	-0.0232618	0	0.000418957	-0.000892234	0.00180992	0.5304	-0.027095	-0.0448742	-0.0090351	0.004	-0.0266761	-0.0444928	-0.00852053
WM_mean	RC1	Memory	-0.0162941	0.00674959	0.015784	-0.0520426	0.000879314	0	-0.00278361	0.000897778	0.00193442	0.0534559	0.00770239	4.04252e-12	-0.0253089	0.00101597	8.1667e-135	-0.0010674	0.000953388	0.262907	-0.033612	0.00716696	2.75297e-06	-0.0289615	0.00733886	7.96459e-05	-0.000871016	-0.00170907	-0.000178083	0.0194	-0.033612	-0.0477894	-0.0189197	0	-0.034483	-0.0486032	-0.0197062	0	0.000257412	-0.000563083	0.00114165	0.5506	-0.0255174	-0.0456759	-0.0059406	0.013	-0.02526	-0.0453603	-0.00562062
WM_mean	RC1	Visuospatial function	-0.0162941	0.00674959	0.015784	-0.0520426	0.000879314	0	-0.00278361	0.000897778	0.00193442	0.0597293	0.00755784	2.87154e-15	-0.0344063	0.0009969	3.19009e-253	-7.87011e-05	0.000935496	0.932956	-0.0160806	0.00703246	0.0222288	-0.0099156	0.00734152	0.176833	-0.000973235	-0.00189335	-0.000204717	0.0184	-0.0160806	-0.0299639	-0.00240483	0.0242	-0.0170538	-0.0308171	-0.00328302	0.0148	0.000287621	-0.00065167	0.00121207	0.5528	-0.0154837	-0.0344584	0.00353434	0.1132	-0.0151961	-0.034221	0.00392411
WM_mean	RC1	Reasoning function	-0.0162941	0.00674959	0.015784	-0.0520426	0.000879314	0	-0.00278361	0.000897778	0.00193442	0.0526528	0.00767343	7.01376e-12	-0.0275083	0.00101215	1.31367e-159	-0.000826405	0.000949803	0.384268	-0.0339961	0.00714001	1.93722e-06	-0.0289659	0.00733886	7.94477e-05	-0.000857931	-0.00169639	-0.000182413	0.0196	-0.0339961	-0.048197	-0.0196541	0	-0.034854	-0.0490588	-0.0205528	0	0.000253545	-0.000564873	0.00113648	0.5482	-0.027729	-0.0467967	-0.00813291	0.0054	-0.0274755	-0.0464483	-0.0079204
WM_mean	RC7	Executive function	-0.0215485	0.00716571	0.00264035	-0.0289271	0.000933525	1.0372e-205	-0.00267309	0.000953128	0.0050439	0.0648058	0.00691519	7.92851e-21	-0.0458559	0.000912013	0	-0.00116449	0.000908678	0.200025	-0.0354243	0.00683175	2.17949e-07	-0.0275634	0.00733915	0.000173397	-0.00139647	-0.00242644	-0.000484816	0.0012	-0.0354243	-0.0491587	-0.0218207	0	-0.0368207	-0.0506562	-0.0231142	0	-8.2767e-05	-0.00120652	0.00101604	0.8834	-0.0265933	-0.0448404	-0.0086508	0.0038	-0.0266761	-0.0451026	-0.00875328
WM_mean	RC7	Memory	-0.0215485	0.00716571	0.00264035	-0.0289271	0.000933525	1.0372e-205	-0.00267309	0.000953128	0.0050439	0.0513012	0.00725475	1.58717e-12	-0.0266069	0.000956797	7.47592e-167	-0.00107906	0.000953298	0.25768	-0.0333776	0.00716722	3.2306e-06	-0.0289615	0.00733886	7.96459e-05	-0.00110546	-0.00196826	-0.000385773	0.0028	-0.0333776	-0.0474303	-0.0189684	0	-0.034483	-0.0486248	-0.0201985	0	-6.55195e-05	-0.000983604	0.000819825	0.878	-0.0251945	-0.0443954	-0.00557787	0.0108	-0.02526	-0.0446207	-0.00568366
WM_mean	RC7	Visuospatial function	-0.0215485	0.00716571	0.00264035	-0.0289271	0.000933525	1.0372e-205	-0.00267309	0.000953128	0.0050439	0.0305739	0.00712719	1.79748e-05	-0.0366303	0.000939974	1.20256e-302	-0.000163237	0.000936536	0.861632	-0.016395	0.00704119	0.0198993	-0.0099156	0.00734152	0.176833	-0.000658824	-0.00136954	-0.000234021	0.0024	-0.016395	-0.0302363	-0.00223636	0.0246	-0.0170538	-0.0308467	-0.00289566	0.0198	-3.90476e-05	-0.000598935	0.000484933	0.896	-0.0151571	-0.0343715	0.0034583	0.118	-0.0151961	-0.0343153	0.00365179
WM_mean	RC7	Reasoning function	-0.0215485	0.00716571	0.00264035	-0.0289271	0.000933525	1.0372e-205	-0.00267309	0.000953128	0.0050439	0.0480704	0.00722836	3.00561e-11	-0.0288579	0.000953317	1.25919e-196	-0.000844473	0.000949831	0.373973	-0.0338181	0.00714115	2.19905e-06	-0.0289659	0.00733886	7.94477e-05	-0.00103585	-0.00186517	-0.000371744	0.003	-0.0338181	-0.047744	-0.0195412	0	-0.034854	-0.0487489	-0.0204955	0	-6.13933e-05	-0.000912149	0.000742621	0.8796	-0.0274141	-0.0472226	-0.00726674	0.0072	-0.0274755	-0.0473674	-0.00743298
[truncated: 55 more columns]

## Sheet: Supplementary Table 8
Supplementary Table 8: Sensitivity analysis replicated with subcortical volumes from FAST
IDP	type.compare	rho	rho.p	gam.rsq	EOA	B.PSE	t.PSE	p.PSE	se.PSE	B.lower.PSE	B.upper.PSE	B.LSE	t.LSE	p.LSE	se.LSE	B.lower.LSE	B.upper.LSE	rho.p.bonf	p.PSE.bonf	p.LSE.bonf	slope.diff.z	slope.diff.p	slope.diff.p.bonf
Volume of grey matter in Thalamus (left) (normalised)	LH	0.193352	8.90386e-24	0.381853	55	0.000184534	11.6809	6.73808e-30	1.5798e-05	0.000153538	0.000215529	0.00100387	36.8843	7.01648e-174	2.72169e-05	0.000950448	0.0010573	6.94501e-21	5.2557e-27	5.47285e-171	26.036	0	0
Volume of grey matter in Thalamus (left) (normalised)	MH	0.771409	0	0.697017	64.4598	0.000129454	12.5615	4.62435e-34	1.03056e-05	0.000109235	0.000149673	0.000915362	21.3599	2.69543e-80	4.28543e-05	0.00083124	0.000999483	0	3.60699e-31	2.10244e-77	17.8307	0	0
Volume of grey matter in Thalamus (left) (normalised)	LM	-0.621141	2.64001e-282	0.455868	69.2036	5.73859e-05	4.98193	7.24662e-07	1.15188e-05	3.4786e-05	7.99859e-05	7.12447e-05	1.17985	0.238412	6.03847e-05	-4.72866e-05	0.000189776	2.05921e-279	0.000565236	1	0.225442	0.821635	1
Volume of grey matter in Thalamus (right) (normalised)	LH	0.184785	8.02109e-22	0.218959	55	1.32214e-05	1.14718	0.251542	1.15252e-05	-9.39084e-06	3.58336e-05	0.00048474	27.8603	1.75465e-119	1.73989e-05	0.000450586	0.000518894	6.25645e-19	1	1.36863e-116	22.5933	0	0
Volume of grey matter in Thalamus (right) (normalised)	MH	0.504568	7.94456e-172	0.733719	68.2253	-0.000186729	-17.8973	1.4159e-63	1.04333e-05	-0.000207199	-0.000166259	0.00144442	33.6976	3.99648e-155	4.28643e-05	0.00136028	0.00152857	6.19676e-169	1.1044e-60	3.11725e-152	36.9744	0	0
Volume of grey matter in Thalamus (right) (normalised)	LM	-0.488258	1.22643e-158	0.629276	71.5984	0.000204386	18.4493	7.02341e-67	1.10782e-05	0.00018265	0.000226121	-0.000962724	-20.7082	1.31012e-76	4.649e-05	-0.00105398	-0.000871467	9.56614e-156	5.47826e-64	1.02189e-73	-24.4207	0	0
Volume of grey matter in Caudate (left) (normalised)	LH	-0.041524	0.0323944	0.673178	71.5764	0.0011405	74.066	0	1.53984e-05	0.00111028	0.00117071	-0.00110026	-21.4381	1.067e-80	5.13224e-05	-0.001201	-0.000999511	1	0	8.32258e-78	-41.8186	0	0
Volume of grey matter in Caudate (left) (normalised)	MH	0.818683	0	0.700296	64.5322	0.000666119	38.4325	2.48603e-210	1.73322e-05	0.000632113	0.000700124	0.0020596	28.245	5.84848e-122	7.29191e-05	0.00191647	0.00220274	0	1.9391e-207	4.56182e-119	18.592	0	0
Volume of grey matter in Caudate (left) (normalised)	LM	-0.551318	2.18655e-210	0.835309	68.4537	0.000471825	29.0578	4.57901e-140	1.62375e-05	0.000439967	0.000503683	-0.00316673	-52.7752	8.60529e-263	6.00041e-05	-0.00328451	-0.00304894	1.70551e-207	3.57163e-137	6.71212e-260	-58.5331	0	0
Volume of grey matter in Caudate (right) (normalised)	LH	0.042287	0.0293421	0.734606	58.5763	0.00144234	75.7295	0	1.90459e-05	0.00140497	0.00147971	-0.00190429	-29.7836	3.20111e-131	6.39376e-05	-0.0020298	-0.00177878	1	0	2.49687e-128	-50.1638	0	0
Volume of grey matter in Caudate (right) (normalised)	MH	0.654258	0	0.457208	58.8357	0.000923771	50.2396	1.38524e-295	1.83873e-05	0.000887695	0.000959846	0.00144252	17.6367	5.66147e-59	8.17907e-05	0.00128197	0.00160307	0	1.08048e-292	4.41595e-56	6.18793	6.09583e-10	4.75475e-07
Volume of grey matter in Caudate (right) (normalised)	LM	-0.324702	4.86325e-66	0.779148	70.2922	0.000524716	24.6638	2.08537e-108	2.12748e-05	0.000482975	0.000566457	-0.0033266	-59.9883	2.53512e-298	5.54542e-05	-0.00343546	-0.00321775	3.79333e-63	1.62659e-105	1.9774e-295	-64.8423	0	0
Volume of grey matter in Putamen (left) (normalised)	LH	0.774188	0	0.798141	58.6004	0.00202823	78.5289	0	2.58278e-05	0.00197756	0.0020789	0.00135397	20.0821	8.94436e-73	6.74218e-05	0.00122163	0.00148632	0	0	6.9766e-70	-9.33879	0	0
Volume of grey matter in Putamen (left) (normalised)	MH	0.919782	0	0.953353	55.553	0.000922895	36.9848	1.46233e-199	2.49534e-05	0.000873937	0.000971853	0.00615044	105.508	0	5.82936e-05	0.00603601	0.00626487	0	1.14061e-196	0	82.4406	0	0
Volume of grey matter in Putamen (left) (normalised)	LM	-0.228175	1.31767e-32	0.82713	69.1068	0.00111445	35.2644	5.90405e-186	3.16028e-05	0.00105245	0.00117646	-0.00505431	-89.9383	0	5.61975e-05	-0.00516462	-0.004944	1.02778e-29	4.60516e-183	0	-95.6783	0	0
Volume of grey matter in Putamen (right) (normalised)	LH	0.911473	0	0.882586	59.9778	0.00165624	73.9509	0	2.23965e-05	0.0016123	0.00170019	0.000666959	11.7659	1.46789e-29	5.6686e-05	0.000555686	0.000778232	0	0	1.14495e-26	-16.2311	0	0
Volume of grey matter in Putamen (right) (normalised)	MH	0.911001	0	0.9314	56.5185	0.00139051	48.1628	5.08574e-281	2.8871e-05	0.00133386	0.00144715	0.0044955	90.5613	0	4.96404e-05	0.00439805	0.00459294	0	3.96688e-278	0	54.0698	0	0
Volume of grey matter in Putamen (right) (normalised)	LM	-0.0685198	0.000419095	0.760547	55.0041	0.000271193	8.06088	1.8642e-15	3.3643e-05	0.000205185	0.0003372	-0.00394565	-79.4252	0	4.96775e-05	-0.00404316	-0.00384813	0.326894	1.45408e-12	0	-70.2835	0	0
Volume of grey matter in Pallidum (left) (normalised)	LH	-0.429296	1.6051e-119	0.615624	72.2047	0.00276425	15.0723	4.69054e-47	0.0001834	0.00240442	0.00312408	-0.0162218	-38.3937	1.03262e-182	0.000422511	-0.0170511	-0.0153924	1.25198e-116	3.65862e-44	8.05442e-180	-41.2203	0	0
Volume of grey matter in Pallidum (left) (normalised)	MH	0.404941	1.61842e-105	0.434117	63.8049	0.00252677	24.0028	5.16577e-104	0.00010527	0.00232024	0.00273331	-0.011531	-26.5078	2.46555e-111	0.000435004	-0.0123849	-0.0106771	1.26237e-102	4.0293e-101	1.92313e-108	-31.4097	0	0
Volume of grey matter in Pallidum (left) (normalised)	LM	-0.769188	0	0.6769	70.7943	0.000268736	2.14304	0.0323162	0.000125399	2.27025e-05	0.000514769	-0.00416752	-15.1524	8.90995e-46	0.00027504	-0.00470741	-0.00362763	0	1	6.94976e-43	-14.6761	0	0
Volume of grey matter in Pallidum (right) (normalised)	LH	-0.239402	6.40513e-36	0.734349	56.0633	0.00141327	14.3794	2.67283e-43	9.82843e-05	0.00122044	0.00160611	-0.0182243	-43.0867	1.77806e-209	0.000422968	-0.0190546	-0.017394	4.996e-33	2.0848e-40	1.38689e-206	-45.2231	0	0
Volume of grey matter in Pallidum (right) (normalised)	MH	0.396295	9.58559e-101	0.60939	65.5237	0.00227353	31.0752	1.83153e-155	7.31622e-05	0.00212999	0.00241708	-0.0121875	-33.3958	2.629e-153	0.00036494	-0.0129038	-0.0114711	7.47676e-98	1.42859e-152	2.05062e-150	-38.8526	0	0
Volume of grey matter in Pallidum (right) (normalised)	LM	-0.743489	0	0.629954	70.681	-0.0008188	-10.5105	9.50637e-25	7.79033e-05	-0.000971647	-0.000665954	-0.00532754	-26.4754	2.18772e-111	0.000201226	-0.00572254	-0.00493255	0	7.41497e-22	1.70642e-108	-20.8951	0	0
Volume of grey matter in Hippocampus (left) (normalised)	LH	0.92327	0	0.87449	58.2621	0.000588662	57.5617	0	1.02266e-05	0.000568598	0.000608727	0.00110996	41.5377	9.15046e-201	2.67217e-05	0.0010575	0.00116241	0	0	7.13736e-198	18.2196	0	0
Volume of grey matter in Hippocampus (left) (normalised)	MH	0.974151	0	0.945813	64.846	0.000582933	56.8003	0	1.02628e-05	0.000562798	0.000603069	0.00214379	77.7856	0	2.75603e-05	0.00208969	0.00219789	0	0	0	53.074	0	0
Volume of grey matter in Hippocampus (left) (normalised)	LM	-0.717524	0	0.735582	69.9535	7.44696e-06	0.62054	0.535024	1.20008e-05	-1.60986e-05	3.09925e-05	-0.00104969	-28.5295	4.78929e-124	3.67931e-05	-0.00112191	-0.000977465	0	1	3.73564e-121	-27.3156	0	0
Volume of grey matter in Hippocampus (right) (normalised)	LH	0.939287	0	0.913904	58.0688	0.000470702	44.7482	7.67475e-256	1.05189e-05	0.000450064	0.00049134	0.00141512	56.9309	1.25562e-281	2.48567e-05	0.00136632	0.00146391	0	5.98631e-253	9.79387e-279	34.9902	0	0
Volume of grey matter in Hippocampus (right) (normalised)	MH	0.959245	0	0.927789	65.4253	0.00037654	37.9754	6.19039e-207	9.91538e-06	0.000357087	0.000395994	0.00226409	67.3284	0	3.36276e-05	0.00219808	0.0023301	0	4.8285e-204	0	53.8394	0	0
Volume of grey matter in Hippocampus (right) (normalised)	LM	-0.678322	0	0.687323	69.2036	9.77282e-05	9.30733	6.30324e-20	1.05001e-05	7.71269e-05	0.000118329	-0.000858035	-18.6338	1.21926e-64	4.60472e-05	-0.000948422	-0.000767647	0	4.91653e-17	9.5102e-62	-20.2367	0	0
Volume of grey matter in Amygdala (left) (normalised)	LH	0.965042	0	0.915195	59.3978	0.0011299	64.4357	0	1.75353e-05	0.0010955	0.00116431	0.000743088	25.9179	1.24275e-107	2.86708e-05	0.000686808	0.000799368	0	0	9.69344e-105	-11.5095	0	0
Volume of grey matter in Amygdala (left) (normalised)	MH	0.821567	0	0.930399	61.4426	9.47773e-05	6.52034	1.03697e-10	1.45356e-05	6.62588e-05	0.000123296	0.00310764	100.532	0	3.09119e-05	0.00304696	0.00316831	0	8.08837e-08	0	88.2012	0	0
Volume of grey matter in Amygdala (left) (normalised)	LM	0.0390005	0.0448186	0.845713	60.8581	0.00104308	99.9299	0	1.04381e-05	0.0010226	0.00106356	-0.00238501	-58.2041	8.73364e-290	4.09766e-05	-0.00246544	-0.00230457	1	0	6.81224e-287	-81.0706	0	0
Volume of grey matter in Amygdala (right) (normalised)	LH	0.955194	0	0.917496	60.5577	0.000623503	35.572	1.46376e-188	1.75279e-05	0.000589113	0.000657892	0.000522513	13.3291	1.05758e-36	3.9201e-05	0.000445562	0.000599464	0	1.14173e-185	8.24914e-34	-2.35182	0.018682	1
Volume of grey matter in Amygdala (right) (normalised)	MH	0.887337	0	0.919763	64.0253	8.20539e-05	4.037	5.76244e-05	2.03255e-05	4.21759e-05	0.000121932	0.00167224	48.2935	3.09806e-238	3.46265e-05	0.00160427	0.00174021	0	0.044947	2.41649e-235	39.6048	0	0
Volume of grey matter in Amygdala (right) (normalised)	LM	0.126052	7.60687e-11	0.52262	58.1246	0.000545548	41.1575	2.38371e-229	1.32551e-05	0.000519541	0.000571555	-0.00112954	-23.79	5.02713e-95	4.74799e-05	-0.00122274	-0.00103635	5.93336e-08	1.85929e-226	3.92116e-92	-33.9807	0	0
Volume of grey matter in Ventral Striatum (left) (normalised)	LH	0.903183	0	0.849188	59.4703	0.00161923	67.8387	0	2.38688e-05	0.0015724	0.00166606	0.00185904	21.4189	1.38533e-80	8.67944e-05	0.00168866	0.00202941	0	0	1.08055e-77	2.66409	0.00771972	1
Volume of grey matter in Ventral Striatum (left) (normalised)	MH	0.919249	0	0.928972	56.9047	0.000362874	14.8591	6.43582e-46	2.44209e-05	0.000314961	0.000410787	0.00290298	70.0876	0	4.14193e-05	0.00282167	0.00298428	0	5.01994e-43	0	52.8279	0	0
Volume of grey matter in Ventral Striatum (left) (normalised)	LM	0.241946	1.44114e-36	0.531194	62.6723	0.00127289	75.5225	0	1.68545e-05	0.00123982	0.00130596	-0.00109089	-13.9961	5.65574e-40	7.79427e-05	-0.00124389	-0.000937897	1.12409e-33	0	4.41148e-37	-29.6421	0	0
Volume of grey matter in Ventral Striatum (right) (normalised)	LH	0.914014	0	0.88257	59.9778	0.00103355	38.4269	9.89805e-210	2.68965e-05	0.000980777	0.00108632	0.00105198	16.3105	9.32099e-52	6.44975e-05	0.000925378	0.00117859	0	7.72048e-207	7.27037e-49	0.263834	0.791908	1
Volume of grey matter in Ventral Striatum (right) (normalised)	MH	0.910995	0	0.910811	58.5219	0.000405404	17.8724	2.01212e-63	2.26832e-05	0.0003609	0.000449908	0.00247654	55.6492	6.73574e-276	4.45027e-05	0.00238918	0.0025639	0	1.56945e-60	5.25388e-273	41.464	0	0
Volume of grey matter in Ventral Striatum (right) (normalised)	LM	0.175837	7.97869e-20	0.356302	62.2127	0.000646915	18.2464	1.27262e-65	3.54544e-05	0.000577354	0.000716477	-0.00145854	-16.7519	3.21481e-54	8.70669e-05	-0.00162944	-0.00128763	6.22338e-17	9.92646e-63	2.50755e-51	-22.3963	0	0

## Sheet: Supplementary Table 9
Supplementary Table 9: Sensitivity analysis replicated with tract integrity from probabilistic tractography
IDP.type	IDP	type.compare	rho	rho.p	gam.rsq	DOA	B.PSE	t.PSE	p.PSE	se.PSE	B.lower.PSE	B.upper.PSE	B.LSE	t.LSE	p.LSE	se.LSE	B.lower.LSE	B.upper.LSE	rho.p.bonf	p.PSE.bonf	p.LSE.bonf	slope.diff.z	slope.diff.p	slope.diff.p.bonf
weighted_fa	Weighted-mean FA in tract acoustic radiation (left)	LH	-0.790344	0	0.826174	63.7019	-0.000113776	-17.9149	1.0478e-63	6.35094e-06	-0.000126237	-0.000101316	0.000672907	24.1234	8.99565e-97	2.78944e-05	0.000618151	0.000727663	0	1.41453e-60	1.21441e-93	27.4985	0	0
weighted_fa	Weighted-mean FA in tract acoustic radiation (left)	MH	-0.430076	2.3719e-120	0.608691	68.509	5.40861e-05	14.8311	9.09258e-46	3.64681e-06	4.69312e-05	6.1241e-05	0.000765021	30.3184	1.24264e-134	2.52329e-05	0.00071549	0.000814552	3.20206e-117	1.2275e-42	1.67757e-131	27.8852	0	0
weighted_fa	Weighted-mean FA in tract acoustic radiation (left)	LM	-0.868767	0	0.807769	56.9398	-0.000170201	-26.0018	6.22164e-118	6.54573e-06	-0.000183044	-0.000157358	-9.88044e-05	-8.54481	6.44516e-17	1.15631e-05	-0.000121502	-7.61069e-05	0	8.39921e-115	8.70096e-14	5.3733	7.73068e-08	0.000104364
weighted_fa	Weighted-mean FA in tract acoustic radiation (right)	LH	-0.528887	5.33924e-192	0.855661	65.1519	1.47244e-05	2.63196	0.00859968	5.59446e-06	3.74823e-06	2.57005e-05	0.00104084	57.5807	6.03429e-285	1.80761e-05	0.00100535	0.00107632	7.20797e-189	1	8.14629e-282	54.2284	0	0
weighted_fa	Weighted-mean FA in tract acoustic radiation (right)	MH	-0.536095	4.70605e-198	0.818443	68.9654	-1.87803e-05	-2.82586	0.00479475	6.64586e-06	-3.18192e-05	-5.74126e-06	0.000972561	40.3529	2.61229e-194	2.41014e-05	0.000925251	0.00101987	6.35317e-195	1	3.52659e-191	39.6523	0	0
weighted_fa	Weighted-mean FA in tract acoustic radiation (right)	LM	-0.509834	2.91259e-175	0.261987	59.6237	3.43487e-05	5.36507	9.75383e-08	6.40229e-06	2.17874e-05	4.691e-05	5.35608e-05	3.62774	0.000304003	1.47642e-05	2.45797e-05	8.2542e-05	3.93199e-172	0.000131677	0.410404	1.19385	0.232538	1
weighted_fa	Weighted-mean FA in tract anterior thalamic radiation (left)	LH	0.0249758	0.19742	0.893416	55.0027	-6.14214e-05	-14.0479	1.40039e-41	4.37229e-06	-6.99997e-05	-5.28431e-05	0.00099152	76.0358	0	1.30402e-05	0.000965922	0.00101712	1	1.89053e-38	0	76.5572	0	0
weighted_fa	Weighted-mean FA in tract anterior thalamic radiation (left)	MH	0.731851	0	0.908335	63.8531	-7.47171e-05	-21.6051	1.58932e-87	3.4583e-06	-8.15022e-05	-6.79321e-05	0.000625206	56.0372	8.35944e-278	1.1157e-05	0.000603305	0.000647107	0	2.14558e-84	1.12852e-274	59.9214	0	0
weighted_fa	Weighted-mean FA in tract anterior thalamic radiation (left)	LM	-0.719652	0	0.762813	63.1054	1.44218e-05	2.57369	0.0101848	5.60354e-06	3.4276e-06	2.54159e-05	0.000352957	29.3807	2.03529e-129	1.20132e-05	0.000329376	0.000376538	0	1	2.74764e-126	25.5386	0	0
weighted_fa	Weighted-mean FA in tract anterior thalamic radiation (right)	LH	-0.347801	1.23225e-76	0.706075	NA	-5.21048e-05	-13.8512	1.49705e-40	3.76176e-06	-5.94852e-05	-4.47243e-05	0.000570335	42.9044	1.44209e-208	1.32932e-05	0.000544241	0.000596429	1.66353e-73	2.02101e-37	1.94682e-205	45.0548	0	0
weighted_fa	Weighted-mean FA in tract anterior thalamic radiation (right)	MH	0.599063	3.53104e-259	0.582853	63.0083	-1.45414e-05	-2.93944	0.00335195	4.947e-06	-2.42473e-05	-4.83552e-06	0.00023058	22.2492	1.43644e-85	1.03635e-05	0.000210237	0.000250924	4.7669e-256	1	1.9392e-82	21.3452	0	0
weighted_fa	Weighted-mean FA in tract anterior thalamic radiation (right)	LM	-0.629772	1.0227e-292	0.531951	58.8016	-3.66438e-05	-6.29451	4.35707e-10	5.82155e-06	-4.80657e-05	-2.52219e-05	0.000325119	30.1417	4.23084e-134	1.07863e-05	0.000303946	0.000346292	1.38065e-289	5.88205e-07	5.71163e-131	29.5147	0	0
weighted_fa	Weighted-mean FA in tract cingulate gyrus part of cingulum (left)	LH	0.291361	2.65502e-53	0.174426	74.3965	1.92266e-05	2.55344	0.0107908	7.5297e-06	4.45361e-06	3.39997e-05	0.000392571	16.4381	1.91002e-52	2.38818e-05	0.000345692	0.00043945	3.58427e-50	1	2.57853e-49	14.9095	0	0
weighted_fa	Weighted-mean FA in tract cingulate gyrus part of cingulum (left)	MH	0.736063	0	0.64209	60.9095	6.34644e-05	9.80695	6.98311e-22	6.47137e-06	5.07678e-05	7.61611e-05	-0.00019665	-9.22	2.62999e-19	2.13287e-05	-0.000238518	-0.000154783	0	9.4272e-19	3.55049e-16	-11.6702	0	0
weighted_fa	Weighted-mean FA in tract cingulate gyrus part of cingulum (left)	LM	-0.648179	1.38354527e-315	0.602566	59.3093	-4.32644e-05	-6.07424	1.68372e-09	7.12259e-06	-5.72389e-05	-2.92898e-05	0.000564874	27.5762	2.90854e-118	2.04841e-05	0.000524665	0.000605082	1.86778611316e-312	2.27302e-06	3.92653e-115	28.0415	0	0
weighted_fa	Weighted-mean FA in tract cingulate gyrus part of cingulum (right)	LH	-0.276716	4.78019e-48	0.739658	62.0826	-0.000224485	-22.0048	2.89419e-90	1.02016e-05	-0.0002445	-0.00020447	0.00175727	46.7021	1.91026e-229	3.76273e-05	0.00168341	0.00183113	6.45326e-45	3.90716e-87	2.57885e-226	50.8329	0	0
weighted_fa	Weighted-mean FA in tract cingulate gyrus part of cingulum (right)	MH	0.935022	0	0.946492	66.0254	0.000104225	17.5908	1.03944e-61	5.92498e-06	9.26004e-05	0.00011585	0.00159553	76.4948	0	2.0858e-05	0.00155459	0.00163648	0	1.40324e-58	0	68.777	0	0
weighted_fa	Weighted-mean FA in tract cingulate gyrus part of cingulum (right)	LM	-0.905005	0	0.796594	63.8031	-0.000329045	-31.9578	1.64811e-161	1.02962e-05	-0.000349246	-0.000308844	0.000134726	3.31454	0.000959144	4.0647e-05	5.49391e-05	0.000214513	0	2.22495e-158	1	11.0604	0	0
weighted_fa	Weighted-mean FA in tract parahippocampal part of cingulum (left)	LH	0.891543	0	0.782998	60.5404	0.000643105	95.7491	0	6.71657e-06	0.000629928	0.000656283	0.000591251	12.6694	1.27618e-33	4.66678e-05	0.000499644	0.000682859	0	0	1.72285e-30	-1.0998	0.271421	1
weighted_fa	Weighted-mean FA in tract parahippocampal part of cingulum (left)	MH	0.952878	0	0.895966	66.6251	0.000491288	43.3165	2.48339e-246	1.13418e-05	0.000469036	0.00051354	0.00132112	40.2079	1.77818e-193	3.28571e-05	0.00125662	0.00138561	0	3.35258e-243	2.40054e-190	23.8733	0	0
weighted_fa	Weighted-mean FA in tract parahippocampal part of cingulum (left)	LM	-0.370822	3.90498e-87	0.596583	74.0827	0.00015089	16.6008	1.01683e-55	9.08931e-06	0.000133057	0.000168723	-0.000722364	-30.0729	1.25462e-133	2.40204e-05	-0.000769514	-0.000675214	5.27172e-84	1.37272e-52	1.69373e-130	-34.0018	0	0
weighted_fa	Weighted-mean FA in tract parahippocampal part of cingulum (right)	LH	0.499838	1.81389e-168	0.227621	55.0014	2.97966e-05	3.01271	0.00264419	9.8903e-06	1.03921e-05	4.9201e-05	8.8456e-05	3.63383	0.0002973	2.43423e-05	4.06727e-05	0.000136239	2.44875e-165	1	0.401355	2.23253	0.0255799	1
weighted_fa	Weighted-mean FA in tract parahippocampal part of cingulum (right)	MH	0.659985	0	0.721526	66.4783	-0.000251881	-19.6846	7.66675e-75	1.27958e-05	-0.000276986	-0.000226776	0.000786989	24.5736	1.48402e-99	3.20258e-05	0.000724123	0.000849854	0	1.03501e-71	2.00342e-96	30.1231	0	0
weighted_fa	Weighted-mean FA in tract parahippocampal part of cingulum (right)	LM	-0.512072	4.82348e-177	0.670678	72.366	0.000274719	22.0195	3.9302e-90	1.24762e-05	0.000250241	0.000299198	-0.000691829	-27.9104	2.54683e-120	2.47875e-05	-0.000740485	-0.000643173	6.5117e-174	5.30578e-87	3.43823e-117	-34.8303	0	0
weighted_fa	Weighted-mean FA in tract corticospinal tract (left)	LH	-0.810587	0	0.692047	67.7217	-3.3602e-05	-7.98841	3.21354e-15	4.20634e-06	-4.18547e-05	-2.53493e-05	-0.000327205	-23.7257	2.26023e-94	1.37911e-05	-0.000354276	-0.000300133	0	4.33828e-12	3.05132e-91	-20.3631	0	0
weighted_fa	Weighted-mean FA in tract corticospinal tract (left)	MH	0.0294743	0.128356	0.393062	61.6982	-0.000125076	-33.779	1.14516e-175	3.70276e-06	-0.00013234	-0.000117811	-0.000271231	-17.3363	2.53574e-57	1.56452e-05	-0.000301942	-0.00024052	1	1.54597e-172	3.42325e-54	-9.09069	0	0
weighted_fa	Weighted-mean FA in tract corticospinal tract (left)	LM	-0.734904	0	0.7705	63.2263	9.40335e-05	22.1109	9.43887e-91	4.25281e-06	8.56895e-05	0.000102378	-5.27081e-05	-5.82475	8.27656e-09	9.049e-06	-7.04707e-05	-3.49456e-05	0	1.27425e-87	1.11734e-05	-14.6763	0	0
weighted_fa	Weighted-mean FA in tract corticospinal tract (right)	LH	-0.807441	0	0.650757	65.5936	-8.60295e-05	-17.7828	6.75522e-63	4.83779e-06	-9.55211e-05	-7.65379e-05	-0.000231385	-26.3518	2.60152e-110	8.78061e-06	-0.000248621	-0.000214149	0	9.11955e-60	3.51205e-107	-14.4991	0	0
weighted_fa	Weighted-mean FA in tract corticospinal tract (right)	MH	-0.437976	3.05441e-125	0.246041	NA	-4.20793e-05	-9.55734	6.70986e-21	4.40282e-06	-5.07175e-05	-3.34411e-05	-0.000178649	-19.6073	4.39297e-70	9.11134e-06	-0.000196534	-0.000160764	4.12345e-122	9.05831e-18	5.93051e-67	-13.4959	0	0
weighted_fa	Weighted-mean FA in tract corticospinal tract (right)	LM	-0.61357	7.91344e-274	0.353232	55.0055	-4.31194e-05	-8.56481	3.37755e-17	5.03448e-06	-5.2997e-05	-3.32417e-05	-5.25994e-05	-6.34037	3.8238e-10	8.29596e-06	-6.88838e-05	-3.63151e-05	1.06831e-270	4.55969e-14	5.16213e-07	-0.976914	0.328612	1
weighted_fa	Weighted-mean FA in tract forceps major	LH	-0.507959	8.10275e-175	0.836445	69.2852	-0.000212615	-42.6014	2.49714e-241	4.99078e-06	-0.000222406	-0.000202823	0.00087985	57.1295	9.07418e-283	1.5401e-05	0.000849618	0.000910082	1.09387e-171	3.37114e-238	1.22501e-279	67.4801	0	0
weighted_fa	Weighted-mean FA in tract forceps major	MH	0.189531	5.87024e-23	0.901222	55.0137	-0.000127675	-25.3589	1.18405e-113	5.03473e-06	-0.000137553	-0.000117797	0.00158365	97.461	0	1.6249e-05	0.00155175	0.00161554	7.92483e-20	1.59847e-110	0	100.6	0	0
weighted_fa	Weighted-mean FA in tract forceps major	LM	-0.937614	0	0.905092	62.7911	-8.77463e-05	-18.142	5.53357e-65	4.83664e-06	-9.72358e-05	-7.82568e-05	-0.000707525	-48.4148	2.24454e-240	1.46138e-05	-0.000736211	-0.000678839	0	7.47033e-62	3.03013e-237	-40.2627	0	0
weighted_fa	Weighted-mean FA in tract forceps minor	LH	-0.187556	1.59843e-22	0.691119	59.6669	-8.06353e-05	-14.2869	7.63092e-43	5.64402e-06	-9.17087e-05	-6.95619e-05	0.000764759	49.9909	6.76736e-247	1.5298e-05	0.000734729	0.000794788	2.15787e-19	1.03017e-39	9.13594e-244	51.8459	0	0
weighted_fa	Weighted-mean FA in tract forceps minor	MH	0.920376	0	0.914835	65.4944	6.57419e-05	18.1636	3.19542e-65	3.61943e-06	5.86407e-05	7.28431e-05	0.00109697	50.6795	9.00514e-251	2.16453e-05	0.00105448	0.00113946	0	4.31382e-62	1.21569e-247	46.9898	0	0
weighted_fa	Weighted-mean FA in tract forceps minor	LM	-0.933878	0	0.87691	60.615	-0.000144296	-28.088	5.24573e-133	5.13727e-06	-0.000154375	-0.000134217	-0.000343238	-27.8802	3.56443e-120	1.23112e-05	-0.000367404	-0.000319072	0	7.08173e-130	4.81198e-117	-14.9131	0	0
weighted_fa	Weighted-mean FA in tract inferior fronto-occipital fasciculus (left)	LH	-0.380925	8.91761e-93	0.761321	66.4336	0.000146399	25.9343	7.78819e-118	5.645e-06	0.000135324	0.000157474	0.000888212	46.7996	5.69439e-230	1.89791e-05	0.000850957	0.000925468	1.20388e-89	1.05141e-114	7.68742e-227	37.4638	0	0
weighted_fa	Weighted-mean FA in tract inferior fronto-occipital fasciculus (left)	MH	0.241942	8.89098e-37	0.882701	55.0137	4.8554e-05	10.44	1.81366e-24	4.65079e-06	3.94293e-05	5.76788e-05	0.00110671	83.9674	0	1.31802e-05	0.00108083	0.00113258	1.20028e-33	2.44844e-21	0	75.7085	0	0
weighted_fa	Weighted-mean FA in tract inferior fronto-occipital fasciculus (left)	LM	-0.70694	0	0.774667	62.5493	0.000101032	21.8487	5.59972e-89	4.62415e-06	9.19592e-05	0.000110104	-0.000228266	-16.1292	6.58843e-51	1.41523e-05	-0.000256046	-0.000200486	0	7.55962e-86	8.89439e-48	-22.1174	0	0
weighted_fa	Weighted-mean FA in tract inferior fronto-occipital fasciculus (right)	LH	-0.475841	1.12797e-150	0.480281	66.1194	3.67975e-05	8.56615	3.2798e-17	4.29569e-06	2.83695e-05	4.52255e-05	0.000567865	26.605	7.41865e-112	2.13442e-05	0.000525967	0.000609763	1.52276e-147	4.42774e-14	1.00152e-108	24.392	0	0
weighted_fa	Weighted-mean FA in tract inferior fronto-occipital fasciculus (right)	MH	-0.224216	1.07407e-31	0.803948	NA	-0.000165843	-43.0528	2.06548e-244	3.85209e-06	-0.000173401	-0.000158286	0.00079054	41.1381	8.44692e-199	1.92167e-05	0.000752819	0.000828262	1.44999e-28	2.7884e-241	1.14033e-195	48.7976	0	0
weighted_fa	Weighted-mean FA in tract inferior fronto-occipital fasciculus (right)	LM	-0.368477	5.60099e-86	0.598802	63.4923	0.000206668	33.5931	1.33843e-173	6.1521e-06	0.000194598	0.000218739	-0.000236385	-21.4446	5.1953e-81	1.10231e-05	-0.000258023	-0.000214748	7.56134e-83	1.80688e-170	7.01366e-78	-35.0971	0	0
weighted_fa	Weighted-mean FA in tract inferior longitudinal fasciculus (left)	LH	-0.604137	6.57858e-265	0.678845	68.0527	1.84054e-05	3.60133	0.000329684	5.11072e-06	8.37832e-06	2.84324e-05	0.000748206	24.3382	4.51918e-98	3.0742e-05	0.00068786	0.000808552	8.88108e-262	0.445073	6.10089e-95	23.4181	0	0
weighted_fa	Weighted-mean FA in tract inferior longitudinal fasciculus (left)	MH	-0.043142	0.0259938	0.883775	NA	-5.96029e-05	-15.2676	3.58131e-48	3.90389e-06	-6.72622e-05	-5.19436e-05	0.000975025	48.0799	4.25112e-237	2.02793e-05	0.000935217	0.00101483	1	4.83476e-45	5.73901e-234	50.0991	0	0
weighted_fa	Weighted-mean FA in tract inferior longitudinal fasciculus (left)	LM	-0.683779	0	0.731641	61.292	7.8172e-05	17.5255	3.20574e-61	4.46047e-06	6.94206e-05	8.69235e-05	-0.000235148	-16.1246	6.97492e-51	1.45832e-05	-0.000263773	-0.000206522	0	4.32775e-58	9.41614e-48	-20.5454	0	0
weighted_fa	Weighted-mean FA in tract inferior longitudinal fasciculus (right)	LH	-0.520192	1.02728e-184	0.264101	NA	3.60005e-05	9.95807	1.72514e-22	3.61521e-06	2.89076e-05	4.30934e-05	8.47985e-05	4.73619	2.58137e-06	1.79044e-05	4.96528e-05	0.000119944	1.38683e-181	2.32894e-19	0.00348485	2.67157	0.00754983	1
weighted_fa	Weighted-mean FA in tract inferior longitudinal fasciculus (right)	MH	-0.00767663	0.692129	0.775332	NA	-0.0001379	-30.6746	1.61725e-152	4.49558e-06	-0.00014672	-0.00012908	0.000567084	45.8856	2.85781e-225	1.23586e-05	0.000542824	0.000591344	1	2.18329e-149	3.85805e-222	53.6073	0	0
weighted_fa	Weighted-mean FA in tract inferior longitudinal fasciculus (right)	LM	-0.295599	1.45439e-54	0.700946	64.3144	0.000175952	37.4444	3.82411e-202	4.69901e-06	0.000166732	0.000185171	-0.000483529	-32.9883	1.58366e-151	1.46576e-05	-0.000512301	-0.000454758	1.96343e-51	5.16255e-199	2.13794e-148	-42.8446	0	0
weighted_fa	Weighted-mean FA in tract middle cerebellar peduncle	LH	-0.47742	8.40965e-152	0.647361	NA	-3.72734e-05	-5.15198	3.01636e-07	7.23478e-06	-5.14678e-05	-2.3079e-05	0.000717515	30.1263	2.32577e-133	2.38169e-05	0.000670763	0.000764267	1.1353e-148	0.000407209	3.13979e-130	30.3232	0	0
weighted_fa	Weighted-mean FA in tract middle cerebellar peduncle	MH	0.405775	4.2068e-106	0.879914	55.0068	-3.59665e-05	-6.85616	1.13661e-11	5.24586e-06	-4.62587e-05	-2.56742e-05	0.00112048	61.9754	5.11181e-306	1.80795e-05	0.00108499	0.00115597	5.67918e-103	1.53443e-08	6.90094e-303	61.4311	0	0
weighted_fa	Weighted-mean FA in tract middle cerebellar peduncle	LM	-0.809728	0	0.794666	65.5717	1.77114e-07	0.0269372	0.978514	6.57507e-06	-1.27232e-05	1.30774e-05	-0.000408369	-28.5893	1.68209e-124	1.42839e-05	-0.000436407	-0.00038033	0	1	2.27082e-121	-25.9813	0	0
weighted_fa	Weighted-mean FA in tract medial lemniscus (left)	LH	-0.290888	3.96974e-53	0.531139	70.4452	0.000205875	30.8967	2.90655e-154	6.66331e-06	0.000192801	0.000218948	0.000327363	24.7994	7.26485e-101	1.32005e-05	0.000301451	0.000353275	5.35915e-50	3.92384e-151	9.80755e-98	8.21596	2.22045e-16	2.9976e-13
weighted_fa	Weighted-mean FA in tract medial lemniscus (left)	MH	0.506021	3.69933e-173	0.342251	65.5396	2.40651e-05	2.58672	0.00980797	9.30332e-06	5.81223e-06	4.23179e-05	0.000167532	8.91861	3.22164e-18	1.87846e-05	0.000130659	0.000204406	4.9941e-170	1	4.34921e-15	6.8441	7.69562e-12	1.03891e-08
weighted_fa	Weighted-mean FA in tract medial lemniscus (left)	LM	-0.562523	5.93771e-221	0.632691	68.0138	0.00017904	22.7691	3.06494e-95	7.86327e-06	0.000163612	0.000194467	0.000152505	6.42997	2.19026e-10	2.37179e-05	0.000105949	0.000199062	8.0159e-218	4.13767e-92	2.95685e-07	-1.06191	0.288278	1
weighted_fa	Weighted-mean FA in tract medial lemniscus (right)	LH	-0.578446	7.26789e-238	0.631102	63.2487	4.50975e-05	6.71579	2.89474e-11	6.71514e-06	3.19226e-05	5.82723e-05	-0.000491668	-29.6908	1.05415e-130	1.65596e-05	-0.000524174	-0.000459162	9.81165e-235	3.90789e-08	1.42311e-127	-30.0383	0	0
weighted_fa	Weighted-mean FA in tract medial lemniscus (right)	MH	-0.519531	4.93765e-184	0.601056	62.5231	0.000106107	14.5445	3.25055e-44	7.29531e-06	9.17935e-05	0.00012042	-0.000392857	-29.9644	1.79912e-132	1.31108e-05	-0.000418593	-0.000367121	6.66583e-181	4.38824e-41	2.42881e-129	-33.2558	0	0
weighted_fa	Weighted-mean FA in tract medial lemniscus (right)	LM	-0.111735	8.10845e-09	0.096472	74.7597	-6.04395e-05	-9.24185	1.11535e-19	6.53976e-06	-7.32705e-05	-4.76085e-05	-9.98685e-05	-5.59178	3.08146e-08	1.78599e-05	-0.000134926	-6.4811e-05	1.09464e-05	1.50572e-16	4.15997e-05	-2.07308	0.0381652	1
weighted_fa	Weighted-mean FA in tract posterior thalamic radiation (left)	LH	0.386215	1.55874e-95	0.606209	56.0419	0.000231228	46.654	1.18379e-270	4.95622e-06	0.000221504	0.000240951	0.000590631	28.6545	2.23935e-124	2.06121e-05	0.00055017	0.000631092	2.1043e-92	1.59812e-267	3.02313e-121	16.9533	0	0
weighted_fa	Weighted-mean FA in tract posterior thalamic radiation (left)	MH	0.860143	0	0.929326	55.0192	0.000114025	26.5058	6.71653e-122	4.30188e-06	0.000105584	0.000122465	0.00149778	79.7104	0	1.87902e-05	0.00146089	0.00153466	0	9.06731e-119	0	71.7849	0	0
weighted_fa	Weighted-mean FA in tract posterior thalamic radiation (left)	LM	-0.561126	1.23951e-219	0.8439	66.7323	0.000118411	25.8026	1.65399e-116	4.58913e-06	0.000109408	0.000127415	-0.000915676	-48.263	1.46772e-239	1.89726e-05	-0.000952918	-0.000878434	1.67334e-216	2.23288e-113	1.98142e-236	-52.9765	0	0
weighted_fa	Weighted-mean FA in tract posterior thalamic radiation (right)	LH	0.362043	2.42106e-83	0.40358	55.0027	0.00015657	33.7186	2.45791e-175	4.64342e-06	0.00014746	0.00016568	0.000465469	20.6026	8.14169e-76	2.25927e-05	0.00042112	0.000509818	3.26843e-80	3.31818e-172	1.09913e-72	13.3925	0	0
weighted_fa	Weighted-mean FA in tract posterior thalamic radiation (right)	MH	0.530459	3.39711e-193	0.93293	55.0137	-6.8412e-05	-13.7928	3.05989e-40	4.95999e-06	-7.81433e-05	-5.86806e-05	0.00138834	83.3973	0	1.66473e-05	0.00135566	0.00142102	4.58609e-190	4.13085e-37	0	83.8636	0	0
weighted_fa	Weighted-mean FA in tract posterior thalamic radiation (right)	LM	-0.346332	1.61462e-75	0.775702	68.7875	0.000229168	32.8244	6.7512e-168	6.98163e-06	0.00021547	0.000242866	-0.000932498	-49.5797	1.3674e-246	1.88081e-05	-0.000969417	-0.000895579	2.17973e-72	9.11411e-165	1.84599e-243	-57.9036	0	0
weighted_fa	Weighted-mean FA in tract superior longitudinal fasciculus (left)	LH	-0.641896	0	0.748709	65.6602	-3.33562e-05	-8.18237	7.11055e-16	4.07659e-06	-4.13543e-05	-2.53581e-05	0.0005134	33.8372	7.84004e-156	1.51727e-05	0.000483616	0.000543183	2.55991e-306	9.59924e-13	1.05841e-152	34.8014	0	0
weighted_fa	Weighted-mean FA in tract superior longitudinal fasciculus (left)	MH	0.00996375	0.607292	0.857678	70.1527	-0.000408018	-68.0901	0	5.99233e-06	-0.000419775	-0.000396261	0.000673782	89.9778	0	7.48831e-06	0.000659082	0.000688481	1	0	0	112.796	0	0
weighted_fa	Weighted-mean FA in tract superior longitudinal fasciculus (left)	LM	-0.411175	1.32623e-108	0.716365	67.8445	0.000377392	56.8714	0	6.63588e-06	0.000364372	0.000390411	-0.000165636	-10.5519	1.83025e-24	1.56972e-05	-0.000196449	-0.000134824	1.79041e-105	0	2.47084e-21	-31.8637	0	0
weighted_fa	Weighted-mean FA in tract superior longitudinal fasciculus (right)	LH	-0.845696	0	0.728821	65.6119	-0.00015811	-38.5681	1.46511e-211	4.09951e-06	-0.000166153	-0.000150067	3.51031e-06	0.337803	0.735601	1.03916e-05	-1.6888e-05	2.39086e-05	0	1.9779e-208	1	14.4679	0	0
weighted_fa	Weighted-mean FA in tract superior longitudinal fasciculus (right)	MH	0.14719	2.28159e-14	0.779461	64.9875	-0.000259556	-56.2394	0	4.6152e-06	-0.000268611	-0.000250501	0.000641453	45.9011	2.35394e-225	1.39747e-05	0.000614022	0.000668885	3.08015e-11	0	3.17781e-222	61.2221	0	0
weighted_fa	Weighted-mean FA in tract superior longitudinal fasciculus (right)	LM	-0.591995	2.53331e-250	0.804513	62.4042	0.000101129	21.453	2.55581e-86	4.71397e-06	9.18802e-05	0.000110378	-0.000637706	-39.1596	2.02723e-188	1.62848e-05	-0.000669672	-0.00060574	3.41997e-247	3.45034e-83	2.73676e-185	-43.5804	0	0
weighted_fa	Weighted-mean FA in tract superior thalamic radiation (left)	LH	-0.95761	0	0.885211	62.1605	-0.00018914	-48.5775	2.55119e-284	3.89356e-06	-0.000196779	-0.000181501	-0.000318093	-27.1824	2.2133e-115	1.17022e-05	-0.000341064	-0.000295122	0	3.44411e-281	2.98795e-112	-10.4561	0	0
weighted_fa	Weighted-mean FA in tract superior thalamic radiation (left)	MH	-0.645057	3.1255421324e-313	0.721051	60.2577	-0.000418669	-63.4456	0	6.59886e-06	-0.000431616	-0.000405722	-0.000337747	-19.5957	5.12526e-70	1.72358e-05	-0.00037158	-0.000303914	4.21948187870867e-310	0	6.9191e-67	4.38462	1.1619e-05	0.0156857
weighted_fa	Weighted-mean FA in tract superior thalamic radiation (left)	LM	-0.32909	6.11072e-68	0.482642	66.7565	0.000232404	33.9578	2.63429e-176	6.8439e-06	0.000218976	0.000245831	1.69657e-05	1.2959	0.195382	1.30918e-05	-8.73252e-06	4.2664e-05	8.24947e-65	3.55629e-173	1	-14.5834	0	0
weighted_fa	Weighted-mean FA in tract superior thalamic radiation (right)	LH	-0.650756	7.885e-321	0.839202	58.9202	-0.000336495	-50.8868	1.71911e-300	6.61263e-06	-0.000349469	-0.000323522	-0.00103655	-53.1082	6.77209e-263	1.95177e-05	-0.00107486	-0.000998237	1.064514e-317	2.3208e-297	9.14232e-260	-33.9709	0	0
weighted_fa	Weighted-mean FA in tract superior thalamic radiation (right)	MH	-0.545316	3.33179e-206	0.670568	72.9073	-0.000278364	-47.6634	1.41143e-277	5.8402e-06	-0.000289822	-0.000266905	-0.000609049	-43.3044	5.02525e-211	1.40644e-05	-0.000636657	-0.000581441	4.49791e-203	1.90543e-274	6.78408e-208	-21.7146	0	0
weighted_fa	Weighted-mean FA in tract superior thalamic radiation (right)	LM	-0.474448	8.5014e-149	0.586405	55.4165	-5.61572e-05	-8.59195	2.70547e-17	6.53603e-06	-6.89809e-05	-4.33335e-05	-0.000415167	-31.3226	2.69857e-141	1.32546e-05	-0.000441184	-0.000389149	1.14769e-145	3.65239e-14	3.64307e-138	-24.2928	0	0
weighted_fa	Weighted-mean FA in tract uncinate fasciculus (left)	LH	-0.564716	2.25737e-224	0.608743	64.6754	6.66379e-05	6.45511	1.57304e-10	1.03233e-05	4.6384e-05	8.68918e-05	0.000369715	16.5397	5.46778e-53	2.23532e-05	0.000325836	0.000413593	3.04745e-221	2.1236e-07	7.3815e-50	12.3093	0	0
weighted_fa	Weighted-mean FA in tract uncinate fasciculus (left)	MH	-0.469187	7.04533e-146	0.856889	66.9419	-0.000304232	-36.659	3.49562e-197	8.29896e-06	-0.000320514	-0.000287949	0.00100295	61.6759	1.22844e-304	1.62616e-05	0.000971028	0.00103487	9.51119e-143	4.71908e-194	1.6584e-301	71.5994	0	0
weighted_fa	Weighted-mean FA in tract uncinate fasciculus (left)	LM	0.220274	1.80271e-30	0.624708	NA	0.000373786	59.0566	0	6.32929e-06	0.000361368	0.000386204	-0.000629864	-28.3158	7.37563e-123	2.22442e-05	-0.000673527	-0.0005862	2.43366e-27	0	9.9571e-120	-43.397	0	0
weighted_fa	Weighted-mean FA in tract uncinate fasciculus (right)	LH	0.39796	7.69248e-102	0.406927	75.1091	0.000206291	40.8297	2.59447e-228	5.05248e-06	0.000196378	0.000216204	0.000360332	16.3872	3.56855e-52	2.19886e-05	0.000317169	0.000403495	1.03848e-98	3.50254e-225	4.81754e-49	6.82757	8.63665e-12	1.16595e-08
weighted_fa	Weighted-mean FA in tract uncinate fasciculus (right)	MH	0.91425	0	0.91565	63.5117	6.59839e-05	13.9085	7.64477e-41	4.74413e-06	5.66761e-05	7.52918e-05	0.000875738	54.8886	3.87703e-272	1.59548e-05	0.000844419	0.000907057	0	1.03204e-37	5.23399e-269	48.6479	0	0
weighted_fa	Weighted-mean FA in tract uncinate fasciculus (right)	LM	-0.683919	0	0.824096	61.8481	0.000140793	23.5545	1.16361e-100	5.97734e-06	0.000129066	0.000152521	-0.000518431	-34.1746	1.1593e-158	1.51701e-05	-0.000548209	-0.000488653	0	1.57087e-97	1.56506e-155	-40.4303	0	0
weighted_md	Weighted-mean MD in tract acoustic radiation (left)	LH	0.831596	0	0.842271	64.4269	-5.39437e-05	-8.54325	3.95401e-17	6.31419e-06	-6.63319e-05	-4.15555e-05	5.19302e-05	3.63372	0.000297424	1.42912e-05	2.3877e-05	7.99833e-05	0	5.33791e-14	0.401522	6.7764	1.23206e-11	1.66328e-08
weighted_md	Weighted-mean MD in tract acoustic radiation (left)	MH	0.867344	0	0.921611	67.8598	-2.92253e-05	-4.07923	4.82116e-05	7.16442e-06	-4.32817e-05	-1.51689e-05	7.10768e-05	7.03992	4.17302e-12	1.00963e-05	5.12582e-05	9.08954e-05	0	0.0650857	5.63358e-09	8.10198	4.44089e-16	5.9952e-13
weighted_md	Weighted-mean MD in tract acoustic radiation (left)	LM	-0.0118772	0.541178	0.0105347	NA	-2.73031e-05	-4.22784	2.54393e-05	6.45793e-06	-3.99736e-05	-1.46326e-05	-1.79807e-05	-1.43262	0.152357	1.2551e-05	-4.26174e-05	6.65588e-06	1	0.034343	1	0.66046	0.508959	1
weighted_md	Weighted-mean MD in tract acoustic radiation (right)	LH	-0.473657	4.00279e-149	0.500415	70.2997	-6.80674e-05	-13.1538	5.47663e-37	5.17472e-06	-7.822e-05	-5.79148e-05	-0.000476807	-36.5685	4.23809e-172	1.30387e-05	-0.000502402	-0.000451213	5.40376e-146	7.39345e-34	5.72142e-169	-29.1373	0	0
weighted_md	Weighted-mean MD in tract acoustic radiation (right)	MH	0.0160831	0.406754	0.0574253	NA	-6.22609e-05	-12.5379	5.99806e-34	4.96583e-06	-7.20037e-05	-5.25181e-05	3.67387e-05	2.2112	0.0273067	1.66148e-05	4.12445e-06	6.9353e-05	1	8.09738e-31	1	5.70898	1.13654e-08	1.53432e-05
weighted_md	Weighted-mean MD in tract acoustic radiation (right)	LM	-0.497739	7.29283e-166	0.548862	75.6543	-7.26623e-06	-1.08538	0.277977	6.69463e-06	-2.04011e-05	5.86865e-06	-0.000502366	-29.7566	1.10488e-131	1.68825e-05	-0.000535505	-0.000469226	9.84533e-163	1	1.49159e-128	-27.261	0	0
weighted_md	Weighted-mean MD in tract anterior thalamic radiation (left)	LH	-0.291479	2.40059e-53	0.820145	56.7426	-6.76723e-05	-16.371	1.82013e-54	4.13367e-06	-7.57824e-05	-5.95622e-05	-0.000906783	-51.927	6.78319e-257	1.74626e-05	-0.000941061	-0.000872504	3.24079e-50	2.45718e-51	9.15731e-254	-46.7596	0	0
weighted_md	Weighted-mean MD in tract anterior thalamic radiation (left)	MH	-0.394403	7.87725e-100	0.644885	55.0137	-8.22144e-05	-23.6496	1.43646e-101	3.47636e-06	-8.90349e-05	-7.53939e-05	-0.000630721	-35.7976	1.09523e-167	1.76191e-05	-0.000665307	-0.000596136	1.06343e-96	1.93922e-98	1.47856e-164	-30.5426	0	0
weighted_md	Weighted-mean MD in tract anterior thalamic radiation (left)	LM	0.0669542	0.000564182	0.298318	59.1401	1.15318e-05	2.544	0.0110873	4.53295e-06	2.63817e-06	2.04255e-05	-0.000263591	-17.6082	6.36758e-59	1.49698e-05	-0.000292976	-0.000234207	0.761646	1	8.59623e-56	-17.5898	0	0
weighted_md	Weighted-mean MD in tract anterior thalamic radiation (right)	LH	-0.211414	2.62642e-28	0.776629	55.5092	-7.85092e-05	-20.3009	7.05866e-79	3.86727e-06	-8.60967e-05	-7.09218e-05	-0.000622593	-59.5224	3.39603e-294	1.04598e-05	-0.000643126	-0.000602061	3.54567e-25	9.52919e-76	4.58464e-291	-48.7887	0	0
weighted_md	Weighted-mean MD in tract anterior thalamic radiation (right)	MH	0.437421	6.79618e-125	0.415367	NA	-6.83639e-05	-17.3048	5.57447e-60	3.95059e-06	-7.61149e-05	-6.0613e-05	-0.000186013	-12.6965	9.41258e-34	1.46507e-05	-0.000214771	-0.000157254	9.17484e-122	7.52554e-57	1.2707e-30	-7.75332	8.88178e-15	1.19904e-11
weighted_md	Weighted-mean MD in tract anterior thalamic radiation (right)	LM	-0.64818	1.379860725e-315	0.674366	74.4454	-1.31273e-05	-2.69	0.00724731	4.88004e-06	-2.27019e-05	-3.55265e-06	-0.000422615	-35.9164	3.83732e-169	1.17666e-05	-0.000445712	-0.000399518	1.862811978815e-312	1	5.18038e-166	-32.1458	0	0
weighted_md	Weighted-mean MD in tract cingulate gyrus part of cingulum (left)	LH	0.515872	3.57322e-181	0.294005	72.4752	7.2442e-05	16.8357	3.40171e-57	4.30288e-06	6.39999e-05	8.08841e-05	6.11957e-05	7.60437	8.13438e-14	8.04744e-06	4.53988e-05	7.69926e-05	4.82385e-178	4.5923e-54	1.09814e-10	-1.23239	0.217804	1
weighted_md	Weighted-mean MD in tract cingulate gyrus part of cingulum (left)	MH	0.315833	9.29932e-63	0.191565	NA	8.24143e-05	19.2093	8.60848e-72	4.29034e-06	7.39967e-05	9.08318e-05	-0.000201394	-12.5425	4.79366e-33	1.60569e-05	-0.000232913	-0.000169875	1.25541e-59	1.16215e-68	6.47144e-30	-17.0761	0	0
weighted_md	Weighted-mean MD in tract cingulate gyrus part of cingulum (left)	LM	0.0313423	0.106794	0.349265	55.0055	-1.22216e-05	-2.65652	0.00800286	4.60058e-06	-2.12479e-05	-3.19521e-06	0.000261632	21.4153	8.10907e-81	1.22171e-05	0.000237651	0.000285613	1	1	1.09472e-77	20.9776	0	0
weighted_md	Weighted-mean MD in tract cingulate gyrus part of cingulum (right)	LH	-0.287442	7.2673e-52	0.330411	74.1185	4.96891e-05	9.52543	8.89231e-21	5.21647e-06	3.94546e-05	5.99237e-05	-0.000213927	-26.0459	1.90742e-108	8.21345e-06	-0.00023005	-0.000197804	9.81085e-49	1.20046e-17	2.57502e-105	-27.0932	0	0
weighted_md	Weighted-mean MD in tract cingulate gyrus part of cingulum (right)	MH	0.2994	2.78332e-56	0.48307	NA	4.14925e-05	11.9142	5.46105e-31	3.48261e-06	3.46597e-05	4.83253e-05	-0.00045652	-28.4875	1.92027e-123	1.60252e-05	-0.000487977	-0.000425063	3.75748e-53	7.37242e-28	2.59236e-120	-30.3679	0	0
weighted_md	Weighted-mean MD in tract cingulate gyrus part of cingulum (right)	LM	-0.376268	7.37184e-90	0.413148	NA	4.8526e-06	0.866074	0.386628	5.60298e-06	-6.14045e-06	1.58456e-05	0.000240535	20.1646	1.82988e-73	1.19286e-05	0.00021712	0.00026395	9.95198e-87	1	2.47034e-70	17.8832	0	0
weighted_md	Weighted-mean MD in tract parahippocampal part of cingulum (left)	LH	-0.632579	7.01107e-298	0.537478	60.5151	-0.000599097	-77.675	0	7.71286e-06	-0.000614229	-0.000583964	-0.000305628	-5.90367	5.27583e-09	5.17692e-05	-0.00040725	-0.000204007	9.46495e-295	0	7.12237e-06	5.6069	2.05985e-08	2.7808e-05
weighted_md	Weighted-mean MD in tract parahippocampal part of cingulum (left)	MH	-0.803736	0	0.667299	58.708	-0.000201681	-19.4547	2.31666e-73	1.03667e-05	-0.000222021	-0.000181342	-0.00123075	-29.2512	4.09804e-128	4.2075e-05	-0.00131334	-0.00114815	0	3.12749e-70	5.53235e-125	-23.7476	0	0
weighted_md	Weighted-mean MD in tract parahippocampal part of cingulum (left)	LM	-0.0798965	3.84184e-05	0.60655	61.969	-0.00040293	-34.5302	1.48882e-180	1.16689e-05	-0.000425825	-0.000380036	0.000908856	33.7233	6.26982e-156	2.69504e-05	0.000855954	0.000961758	0.0518649	2.00991e-177	8.46426e-153	44.6669	0	0
weighted_md	Weighted-mean MD in tract parahippocampal part of cingulum (right)	LH	-0.391549	2.2918e-98	0.824911	65.0069	0.00034995	51.3006	2.32123e-303	6.82155e-06	0.000336566	0.000363333	-0.0010833	-38.3775	1.04934e-182	2.82276e-05	-0.00113871	-0.00102789	3.09393e-95	3.13366e-300	1.4166e-179	-49.3542	0	0
weighted_md	Weighted-mean MD in tract parahippocampal part of cingulum (right)	MH	-0.186576	2.76122e-22	0.597315	68.0745	0.000433413	32.4118	1.8673e-165	1.33721e-05	0.000407178	0.000459649	-0.000972724	-24.1914	3.06655e-97	4.02094e-05	-0.00105165	-0.000893794	3.72764e-19	2.52085e-162	4.13985e-94	-33.1835	0	0
weighted_md	Weighted-mean MD in tract parahippocampal part of cingulum (right)	LM	-0.444789	6.80447e-129	0.175292	64.4836	-8.63643e-05	-8.06209	1.84555e-15	1.07124e-05	-0.000107382	-6.53466e-05	-0.000110651	-5.53765	4.15638e-08	1.99816e-05	-0.000149873	-7.14286e-05	9.18604e-126	2.49149e-12	5.61111e-05	-1.07122	0.28407	1
weighted_md	Weighted-mean MD in tract corticospinal tract (left)	LH	0.817525	0	0.8344	73.2479	6.8619e-05	21.8735	2.25728e-89	3.13709e-06	6.24641e-05	7.47738e-05	0.000363037	47.5003	9.80456e-234	7.64283e-06	0.000348035	0.00037804	0	3.04733e-86	1.32362e-230	35.6369	0	0
weighted_md	Weighted-mean MD in tract corticospinal tract (left)	MH	0.216059	1.68909e-29	0.0827392	NA	-2.66909e-05	-6.8145	1.50324e-11	3.91678e-06	-3.43755e-05	-1.90063e-05	-0.000148882	-10.7029	4.63082e-25	1.39105e-05	-0.000176188	-0.000121576	2.28027e-26	2.02937e-08	6.25161e-22	-8.45533	0	0
weighted_md	Weighted-mean MD in tract corticospinal tract (left)	LM	0.505026	1.76223e-171	0.542984	55.6583	9.48982e-05	28.375	4.23728e-135	3.34443e-06	8.83364e-05	0.00010146	0.000501602	32.6513	2.0546e-149	1.53624e-05	0.000471447	0.000531757	2.37901e-168	5.72033e-132	2.77371e-146	25.8681	0	0
weighted_md	Weighted-mean MD in tract corticospinal tract (right)	LH	0.318451	7.10297e-64	0.547047	74.2874	0.000146926	33.1684	3.21644e-171	4.4297e-06	0.000138235	0.000155617	0.000332468	36.1545	1.18699e-169	9.19574e-06	0.000314417	0.000350519	9.589e-61	4.34219e-168	1.60243e-166	18.1778	0	0
weighted_md	Weighted-mean MD in tract corticospinal tract (right)	MH	0.822792	0	0.698641	NA	0.000142967	41.8867	6.90667e-236	3.41318e-06	0.00013627	0.000149663	-9.00529e-05	-7.70984	3.77848e-14	1.16803e-05	-0.000112981	-6.7125e-05	0	9.324e-233	5.10095e-11	-19.149	0	0
weighted_md	Weighted-mean MD in tract corticospinal tract (right)	LM	-0.545694	1.81415e-205	0.637964	NA	6.26384e-06	2.35583	0.0186462	2.65887e-06	1.04714e-06	1.14805e-05	0.000412889	28.0279	4.81983e-121	1.47314e-05	0.000383973	0.000441806	2.4491e-202	1	6.50677e-118	27.1637	0	0
weighted_md	Weighted-mean MD in tract forceps major	LH	0.74309	0	0.79105	NA	6.82359e-05	9.53624	8.07296e-21	7.15543e-06	5.41972e-05	8.22746e-05	-0.000393518	-26.404	1.25077e-110	1.49037e-05	-0.000422773	-0.000364262	0	1.08985e-17	1.68855e-107	-27.9302	0	0
weighted_md	Weighted-mean MD in tract forceps major	MH	0.128145	3.19927e-11	0.80396	NA	-7.13182e-05	-10.094	4.8762e-23	7.0654e-06	-8.51803e-05	-5.7456e-05	-0.00107316	-80.29	0	1.3366e-05	-0.00109939	-0.00104692	4.31901e-08	6.58288e-20	0	-66.2656	0	0
weighted_md	Weighted-mean MD in tract forceps major	LM	0.893189	0	0.850702	60.5425	0.000140597	21.448	2.76335e-86	6.55526e-06	0.000127735	0.000153458	0.000660996	43.8119	5.52387e-215	1.50871e-05	0.000631381	0.000690611	0	3.73052e-83	7.45723e-212	31.6358	0	0
weighted_md	Weighted-mean MD in tract forceps minor	LH	0.084579	1.23077e-05	0.334391	59.5489	-1.63191e-05	-3.10307	0.00196056	5.25903e-06	-2.66371e-05	-6.00107e-06	-0.000321986	-41.8355	1.4896e-202	7.69648e-06	-0.000337094	-0.000306878	0.0166154	1	2.01096e-199	-32.791	0	0
weighted_md	Weighted-mean MD in tract forceps minor	MH	-0.00785123	0.685497	0.858235	55.0192	6.547e-05	15.0903	3.43851e-47	4.33856e-06	5.69579e-05	7.39822e-05	-0.000847954	-70.3953	0	1.20456e-05	-0.0008716	-0.000824309	1	4.64199e-44	0	-71.3439	0	0
weighted_md	Weighted-mean MD in tract forceps minor	LM	0.19377	7.98264e-24	0.722092	55.0055	-8.58898e-05	-16.6831	3.34903e-56	5.14831e-06	-9.59908e-05	-7.57888e-05	0.000516856	43.9537	8.8513e-216	1.17591e-05	0.000493774	0.000539939	1.07766e-20	4.52119e-53	1.19493e-212	46.9548	0	0
weighted_md	Weighted-mean MD in tract inferior fronto-occipital fasciculus (left)	LH	0.584285	8.44856e-244	0.751589	64.8197	-1.596e-06	-0.397485	0.691082	4.01525e-06	-9.47379e-06	6.28179e-06	-0.000468743	-44.2083	8.01825e-216	1.06031e-05	-0.000489556	-0.000447929	1.14055e-240	1	1.08246e-212	-41.2024	0	0
weighted_md	Weighted-mean MD in tract inferior fronto-occipital fasciculus (left)	MH	0.413511	1.64072e-110	0.852754	NA	1.70356e-05	3.32256	0.000919219	5.12725e-06	6.9761e-06	2.70952e-05	-0.0010278	-57.05	9.61182e-283	1.80158e-05	-0.00106317	-0.000992437	2.21498e-107	1	1.2976e-279	-55.7806	0	0
weighted_md	Weighted-mean MD in tract inferior fronto-occipital fasciculus (left)	LM	0.14396	9.71609e-14	0.685501	55.0055	-2.07548e-05	-4.08715	4.66605e-05	5.07805e-06	-3.07179e-05	-1.07916e-05	0.000550127	39.7375	1.06461e-191	1.3844e-05	0.000522952	0.000577302	1.31167e-10	0.0629917	1.43723e-188	38.7144	0	0
weighted_md	Weighted-mean MD in tract inferior fronto-occipital fasciculus (right)	LH	0.542919	3.26193e-204	0.648821	65.0615	6.88119e-05	17.4229	1.04262e-60	3.94951e-06	6.10631e-05	7.65607e-05	-0.000455502	-40.0828	1.44573e-192	1.1364e-05	-0.000477809	-0.000433194	4.4036e-201	1.40753e-57	1.95174e-189	-43.581	0	0
weighted_md	Weighted-mean MD in tract inferior fronto-occipital fasciculus (right)	MH	0.491628	4.23631e-162	0.803064	NA	5.17545e-05	10.9875	8.2533e-27	4.71033e-06	4.2513e-05	6.09961e-05	-0.00102259	-47.6353	1.0088e-234	2.1467e-05	-0.00106472	-0.000980446	5.71902e-159	1.1142e-23	1.36188e-231	-48.8832	0	0
weighted_md	Weighted-mean MD in tract inferior fronto-occipital fasciculus (right)	LM	-0.327973	1.82243e-67	0.672428	NA	1.56984e-05	3.22201	0.00130815	4.87222e-06	6.13906e-06	2.52577e-05	0.000558102	37.8958	6.58467e-181	1.47273e-05	0.000529194	0.000587011	2.46029e-64	1	8.88931e-178	34.9661	0	0
weighted_md	Weighted-mean MD in tract inferior longitudinal fasciculus (left)	LH	0.57855	5.70851e-238	0.616627	68.3988	-0.000125916	-23.6612	1.0786e-101	5.32161e-06	-0.000136357	-0.000115475	-0.000481422	-25.3186	5.10542e-104	1.90146e-05	-0.000518747	-0.000444097	7.70649e-235	1.45611e-98	6.89232e-101	-18.0047	0	0
weighted_md	Weighted-mean MD in tract inferior longitudinal fasciculus (left)	MH	0.438582	1.27068e-125	0.810812	NA	-4.81516e-06	-1.03675	0.300064	4.64447e-06	-1.39275e-05	4.29716e-06	-0.00112452	-44.4202	3.1615e-217	2.53154e-05	-0.00117421	-0.00107482	1.71542e-122	1	4.26803e-214	-43.5039	0	0
weighted_md	Weighted-mean MD in tract inferior longitudinal fasciculus (left)	LM	0.0626457	0.00125567	0.709515	55.0055	-0.000123949	-22.8242	1.28264e-95	5.43059e-06	-0.000134604	-0.000113294	0.000631067	40.9796	6.91153e-199	1.53995e-05	0.000600839	0.000661296	1	1.73156e-92	9.33057e-196	46.2377	0	0
weighted_md	Weighted-mean MD in tract inferior longitudinal fasciculus (right)	LH	0.242967	4.12592e-37	0.536196	NA	-6.808e-05	-16.0933	7.37942e-53	4.23033e-06	-7.63797e-05	-5.97802e-05	-0.000439254	-36.2234	4.64038e-170	1.21262e-05	-0.000463058	-0.000415451	5.56999e-34	9.96222e-50	6.26452e-167	-28.901	0	0
weighted_md	Weighted-mean MD in tract inferior longitudinal fasciculus (right)	MH	0.399809	8.81507e-103	0.798725	NA	3.7464e-05	9.06348	5.10691e-19	4.13351e-06	2.93542e-05	4.55738e-05	-0.000982486	-46.3286	1.11486e-227	2.12069e-05	-0.00102411	-0.000940857	1.19003e-99	6.89433e-16	1.50507e-224	-47.2068	0	0
weighted_md	Weighted-mean MD in tract inferior longitudinal fasciculus (right)	LM	-0.207865	3.0287e-27	0.658655	NA	-0.000107701	-21.7928	1.33421e-88	4.94206e-06	-0.000117398	-9.80049e-05	0.00053444	36.3614	8.41675e-172	1.4698e-05	0.000505589	0.000563291	4.08875e-24	1.80119e-85	1.13626e-168	41.4107	0	0
weighted_md	Weighted-mean MD in tract middle cerebellar peduncle	LH	0.827312	0	0.767701	61.8694	0.000191332	24.0054	4.16388e-104	7.97036e-06	0.000175694	0.000206969	0.000839412	38.8489	1.91034e-185	2.16071e-05	0.000796998	0.000881826	0	5.62123e-101	2.57895e-182	28.1404	0	0
weighted_md	Weighted-mean MD in tract middle cerebellar peduncle	MH	0.553062	3.00153e-213	0.517751	60.3457	0.000431193	36.2769	2.48066e-194	1.18862e-05	0.000407873	0.000454514	-0.000124081	-4.65182	3.855e-06	2.66736e-05	-0.00017644	-7.17215e-05	4.05207e-210	3.3489e-191	0.00520426	-19.0149	0	0
weighted_md	Weighted-mean MD in tract middle cerebellar peduncle	LM	0.11852	9.43178e-10	0.517601	71.7132	-0.00024575	-19.2209	9.72201e-72	1.27855e-05	-0.000270835	-0.000220664	0.00095702	27.0878	2.94569e-115	3.53303e-05	0.000887669	0.00102637	1.27329e-06	1.31247e-68	3.97668e-112	32.0119	0	0
weighted_md	Weighted-mean MD in tract medial lemniscus (left)	LH	0.563334	4.75653e-223	0.310462	58.8683	4.80295e-05	8.41278	1.13792e-16	5.70912e-06	3.68284e-05	5.92306e-05	-0.000157158	-15.1073	1.73608e-45	1.04028e-05	-0.000177579	-0.000136738	6.42132e-220	1.53619e-13	2.34371e-42	-17.2914	0	0
weighted_md	Weighted-mean MD in tract medial lemniscus (left)	MH	-0.540307	9.57047e-202	0.541169	64.7462	9.55116e-05	9.91045	2.69413e-22	9.63747e-06	7.66032e-05	0.00011442	-0.000475667	-39.3852	9.83894e-189	1.20773e-05	-0.000499374	-0.00045196	1.29201e-198	3.63707e-19	1.32826e-185	-36.9664	0	0
weighted_md	Weighted-mean MD in tract medial lemniscus (left)	LM	0.840134	0	0.860287	60.6392	-4.70296e-05	-8.42486	1.05043e-16	5.58224e-06	-5.7982e-05	-3.60773e-05	0.000316329	36.0344	6.35422e-170	8.77853e-06	0.000299098	0.000333561	0	1.41809e-13	8.5782e-167	34.928	0	0
weighted_md	Weighted-mean MD in tract medial lemniscus (right)	LH	-0.0646536	0.000839052	0.418995	75.1091	6.92685e-05	8.256	3.97814e-16	8.39009e-06	5.28075e-05	8.57296e-05	-0.000603467	-45.8968	4.40324e-225	1.31483e-05	-0.000629277	-0.000577657	1	5.37049e-13	5.94437e-222	-43.1318	0	0
weighted_md	Weighted-mean MD in tract medial lemniscus (right)	MH	0.17206	3.83573e-19	0.690545	58.3017	0.000413076	41.7745	4.58548e-235	9.88824e-06	0.000393676	0.000432477	-0.000599099	-47.93	2.67845e-236	1.24995e-05	-0.000623635	-0.000574563	5.17824e-16	6.19039e-232	3.61591e-233	-63.5078	0	0
weighted_md	Weighted-mean MD in tract medial lemniscus (right)	LM	-0.337182	1.94983e-71	0.803641	62.6702	-0.000346062	-79.0692	0	4.3767e-06	-0.000354649	-0.000337475	1.40113e-06	0.221037	0.82512	6.33889e-06	-1.10416e-05	1.38439e-05	2.63227e-68	0	1	45.1072	0	0
weighted_md	Weighted-mean MD in tract posterior thalamic radiation (left)	LH	-0.217553	6.46789e-30	0.712801	56.4994	-0.000224971	-32.085	4.01892e-163	7.0117e-06	-0.000238727	-0.000211214	-0.00125253	-47.5718	4.06336e-234	2.63292e-05	-0.00130421	-0.00120084	8.73166e-27	5.42554e-160	5.48553e-231	-37.7129	0	0
weighted_md	Weighted-mean MD in tract posterior thalamic radiation (left)	MH	-0.78487	0	0.872544	55.6656	-0.000199799	-35.6189	2.03209e-189	5.60935e-06	-0.000210804	-0.000188794	-0.00181793	-61.9985	4.00248e-306	2.93221e-05	-0.00187549	-0.00176037	0	2.74332e-186	5.40334e-303	-54.2017	0	0
weighted_md	Weighted-mean MD in tract posterior thalamic radiation (left)	LM	0.802144	0	0.780422	60.9777	-2.84806e-05	-4.68695	3.09967e-06	6.07657e-06	-4.04029e-05	-1.65584e-05	0.000557918	28.9621	8.53521e-127	1.92637e-05	0.000520105	0.000595731	0	0.00418456	1.15225e-123	29.0305	0	0
weighted_md	Weighted-mean MD in tract posterior thalamic radiation (right)	LH	-0.307834	1.34602e-59	0.450212	55.1935	-0.000107171	-22.1538	2.79783e-91	4.83758e-06	-0.000116662	-9.76796e-05	-0.000667819	-23.1476	6.77774e-91	2.88504e-05	-0.000724452	-0.000611187	1.81712e-56	3.77706e-88	9.14995e-88	-19.1654	0	0
weighted_md	Weighted-mean MD in tract posterior thalamic radiation (right)	MH	-0.268329	3.80869e-45	0.854458	55.0137	0.000135065	28.0157	6.84053e-133	4.82106e-06	0.000125606	0.000144524	-0.00115038	-47.7558	2.28529e-235	2.40888e-05	-0.00119767	-0.0011031	5.14173e-42	9.23472e-130	3.08515e-232	-52.3251	0	0
weighted_md	Weighted-mean MD in tract posterior thalamic radiation (right)	LM	0.17312	2.86314e-19	0.625048	69.0776	-0.000244985	-35.31	2.44057e-186	6.93812e-06	-0.000258598	-0.000231372	0.000483864	28.6098	1.25806e-124	1.69125e-05	0.000450666	0.000517062	3.86523e-16	3.29477e-183	1.69838e-121	39.8707	0	0
weighted_md	Weighted-mean MD in tract superior longitudinal fasciculus (left)	LH	-0.275298	1.48505e-47	0.620157	56.9844	2.33972e-05	5.40809	7.69837e-08	4.32632e-06	1.49091e-05	3.18853e-05	-0.000591818	-35.121	1.63418e-163	1.68508e-05	-0.000624896	-0.00055874	2.00482e-44	0.000103928	2.20615e-160	-35.3626	0	0
weighted_md	Weighted-mean MD in tract superior longitudinal fasciculus (left)	MH	-0.324889	1.6592e-66	0.882621	55.0192	0.000113184	23.8912	2.92545e-103	4.73747e-06	0.000103889	0.000122479	-0.000972419	-67.94	0	1.43129e-05	-0.00100051	-0.000944323	2.23992e-63	3.94936e-100	0	-72.0059	0	0
weighted_md	Weighted-mean MD in tract superior longitudinal fasciculus (left)	LM	0.28996	1.76585e-52	0.605913	64.6529	-9.03512e-05	-22.916	3.00434e-96	3.94271e-06	-9.80868e-05	-8.26156e-05	0.000377513	28.6925	3.89912e-125	1.31572e-05	0.000351687	0.00040334	2.3839e-49	4.05586e-93	5.26381e-122	34.063	0	0
weighted_md	Weighted-mean MD in tract superior longitudinal fasciculus (right)	LH	0.207187	3.14713e-27	0.0616604	56.0177	7.03993e-05	17.8628	2.18614e-63	3.94111e-06	6.2667e-05	7.81316e-05	-1.16859e-05	-1.08225	0.279471	1.07977e-05	-3.28815e-05	9.50978e-06	4.24862e-24	2.95129e-60	1	-7.14126	9.24816e-13	1.2485e-09
weighted_md	Weighted-mean MD in tract superior longitudinal fasciculus (right)	MH	-0.283058	3.01062e-50	0.776643	65.7116	9.10613e-05	22.6904	6.42651e-95	4.01321e-06	8.31875e-05	9.89351e-05	-0.000579158	-50.7031	6.78728e-251	1.14225e-05	-0.00060158	-0.000556736	4.06433e-47	8.67579e-92	9.16283e-248	-55.3579	0	0
weighted_md	Weighted-mean MD in tract superior longitudinal fasciculus (right)	LM	0.35041	2.21013e-77	0.643292	65.7168	-1.98096e-05	-4.87849	1.21716e-06	4.06061e-06	-2.77765e-05	-1.18427e-05	0.000558837	37.7481	4.05424e-180	1.48044e-05	0.000529777	0.000587897	2.98367e-74	0.00164316	5.47322e-177	37.694	0	0
weighted_md	Weighted-mean MD in tract superior thalamic radiation (left)	LH	-0.538877	1.23392e-200	0.707181	72.3652	-7.2945e-05	-24.2912	4.04267e-106	3.00293e-06	-7.88366e-05	-6.70533e-05	-0.00060791	-32.247	3.03368e-146	1.88517e-05	-0.000644915	-0.000570905	1.66579e-197	5.45761e-103	4.09547e-143	-28.0243	0	0
weighted_md	Weighted-mean MD in tract superior thalamic radiation (left)	MH	-0.562786	2.3222e-222	0.69452	55.0192	1.73722e-05	3.74021	0.000192671	4.6447e-06	8.2594e-06	2.6485e-05	-0.000603021	-36.4014	2.87429e-171	1.65659e-05	-0.000635539	-0.000570503	3.13496e-219	0.260105	3.88029e-168	-36.0595	0	0
weighted_md	Weighted-mean MD in tract superior thalamic radiation (left)	LM	0.239712	6.20767e-36	0.229926	61.9932	-9.06607e-05	-18.3734	2.05066e-66	4.93435e-06	-0.000100342	-8.09795e-05	2.04896e-06	0.17875	0.858179	1.14627e-05	-2.04515e-05	2.45494e-05	8.38036e-33	2.76839e-63	1	7.42887	1.09468e-13	1.47782e-10
weighted_md	Weighted-mean MD in tract superior thalamic radiation (right)	LH	-0.608261	1.75417e-269	0.369089	69.9712	-1.77859e-05	-6.13358	1.16874e-09	2.89976e-06	-2.34751e-05	-1.20967e-05	-0.000166412	-11.4069	5.23662e-28	1.45887e-05	-0.000195049	-0.000137775	2.36813e-266	1.5778e-06	7.06943e-25	-9.99228	0	0
weighted_md	Weighted-mean MD in tract superior thalamic radiation (right)	MH	-0.537435	3.19093e-199	0.733905	55.0192	-7.69006e-07	-0.237816	0.812065	3.23362e-06	-7.11328e-06	5.57527e-06	-0.000470755	-37.3758	5.14325e-177	1.25952e-05	-0.000495479	-0.000446031	4.30776e-196	1	6.94338e-174	-36.1426	0	0
weighted_md	Weighted-mean MD in tract superior thalamic radiation (right)	LM	-0.0985513	3.72964e-07	0.352658	NA	-1.91291e-05	-5.08509	4.27807e-07	3.7618e-06	-2.65097e-05	-1.17484e-05	0.000302034	21.4959	2.6963e-81	1.40508e-05	0.000274453	0.000329614	0.000503501	0.00057754	3.64001e-78	22.0797	0	0
weighted_md	Weighted-mean MD in tract uncinate fasciculus (left)	LH	0.789234	0	0.813701	64.5295	-0.000112791	-23.7439	2.84606e-102	4.7503e-06	-0.000122111	-0.000103471	4.29323e-05	2.86431	0.00429005	1.49887e-05	1.35099e-05	7.23548e-05	0	3.84218e-99	1	9.90385	0	0
weighted_md	Weighted-mean MD in tract uncinate fasciculus (left)	MH	0.587216	1.21898e-246	0.821934	NA	-9.17713e-05	-14.3669	2.91166e-43	6.3877e-06	-0.000104304	-7.92388e-05	-0.000597771	-29.7319	4.73135e-131	2.01054e-05	-0.000637237	-0.000558305	1.64563e-243	3.93074e-40	6.38732e-128	-23.9859	0	0
weighted_md	Weighted-mean MD in tract uncinate fasciculus (left)	LM	-0.212813	1.65777e-28	0.609397	NA	-2.41594e-05	-5.47126	5.4656e-08	4.41569e-06	-3.28229e-05	-1.54958e-05	0.000629803	34.1044	3.08442e-158	1.84669e-05	0.000593553	0.000666052	2.23799e-25	7.37856e-05	4.16397e-155	34.4417	0	0
weighted_md	Weighted-mean MD in tract uncinate fasciculus (right)	LH	-0.0377222	0.0515182	0.264925	74.6739	1.73198e-05	5.77677	9.72057e-09	2.99819e-06	1.14375e-05	2.32022e-05	-0.000128705	-12.8518	1.82985e-34	1.00146e-05	-0.000148364	-0.000109047	1	1.31228e-05	2.4703e-31	-13.9687	0	0
weighted_md	Weighted-mean MD in tract uncinate fasciculus (right)	MH	-0.0777007	5.97301e-05	0.658158	55.0192	-6.0347e-05	-13.6457	1.76109e-39	4.42243e-06	-6.90237e-05	-5.16703e-05	-0.000447078	-32.2833	1.39329e-146	1.38486e-05	-0.000474263	-0.000419894	0.0806356	2.37748e-36	1.88095e-143	-26.6022	0	0
weighted_md	Weighted-mean MD in tract uncinate fasciculus (right)	LM	0.0966997	6.154e-07	0.403028	55.0055	7.58215e-05	18.0412	2.30741e-64	4.20269e-06	6.75759e-05	8.40672e-05	0.000312635	22.9023	1.03921e-89	1.36508e-05	0.000285839	0.00033943	0.00083079	3.115e-61	1.40294e-86	16.58	0	0
weighted_mo	Weighted-mean MO in tract acoustic radiation (left)	LH	-0.874227	0	0.859095	67.9071	-0.000563861	-27.0365	8.20828e-126	2.08555e-05	-0.000604779	-0.000522944	0.000233427	3.97823	7.58119e-05	5.86762e-05	0.000118248	0.000348607	0	1.10812e-122	0.102346	12.8033	0	0
weighted_mo	Weighted-mean MO in tract acoustic radiation (left)	MH	-0.723474	0	0.450676	NA	-8.07561e-06	-0.540387	0.589032	1.49441e-05	-3.73955e-05	2.12443e-05	1.38185e-05	0.196896	0.84396	7.01819e-05	-0.000123946	0.000151583	0	1	1	0.305122	0.760273	1
weighted_mo	Weighted-mean MO in tract acoustic radiation (left)	LM	-0.808131	0	0.809461	63.6616	-0.00056639	-31.3201	9.36708e-157	1.80839e-05	-0.00060187	-0.000530909	0.000212089	9.28528	1.47632e-19	2.28415e-05	0.000167253	0.000256925	0	1.26456e-153	1.99303e-16	26.7211	0	0
weighted_mo	Weighted-mean MO in tract acoustic radiation (right)	LH	-0.705639	0	0.676596	63.3143	-0.000924969	-34.175	9.44053e-179	2.70656e-05	-0.000978071	-0.000871867	0.000115203	2.30955	0.0211701	4.9881e-05	1.72878e-05	0.000213118	0	1.27447e-175	1	18.3287	0	0
weighted_mo	Weighted-mean MO in tract acoustic radiation (right)	MH	-0.499914	2.11359e-168	0.290239	65.1743	-0.0003107	-10.2684	9.38623e-24	3.0258e-05	-0.000370066	-0.000251335	-0.000854756	-8.07166	2.56999e-15	0.000105896	-0.00106263	-0.000646886	2.85335e-165	1.26714e-20	3.46948e-12	-4.93994	7.81463e-07	0.00105498
weighted_mo	Weighted-mean MO in tract acoustic radiation (right)	LM	-0.174432	1.52543e-19	0.260686	62.912	-0.000644579	-18.0568	1.84929e-64	3.56972e-05	-0.000714617	-0.000574541	0.000948319	9.44414	3.80443e-20	0.000100413	0.000751214	0.00114542	2.05933e-16	2.49654e-61	5.13598e-17	14.947	0	0
weighted_mo	Weighted-mean MO in tract anterior thalamic radiation (left)	LH	-0.0202731	0.295474	0.649477	63.9491	-0.000304221	-19.4272	3.29643e-73	1.56595e-05	-0.000334944	-0.000273497	0.0022842	45.9095	3.75502e-225	4.97545e-05	0.00218654	0.00238187	1	4.45018e-70	5.06928e-222	49.6241	0	0
weighted_mo	Weighted-mean MO in tract anterior thalamic radiation (left)	MH	0.916816	0	0.876379	60.3983	0.000615379	45.3847	2.67297e-261	1.35592e-05	0.000588777	0.000641982	0.00160472	68.7021	0	2.33576e-05	0.00155887	0.00165057	0	3.60852e-258	0	36.6314	0	0
weighted_mo	Weighted-mean MO in tract anterior thalamic radiation (left)	LM	-0.62423	3.94801e-286	0.773153	62.4526	-0.000928149	-62.7128	0	1.48e-05	-0.000957186	-0.000899111	0.000673939	18.3908	2.71371e-63	3.66454e-05	0.000602007	0.000745871	5.32982e-283	0	3.66351e-60	40.5374	0	0
weighted_mo	Weighted-mean MO in tract anterior thalamic radiation (right)	LH	0.39177	1.74403e-98	0.863135	71.204	4.6387e-05	3.83116	0.000134222	1.21078e-05	2.26319e-05	7.01421e-05	0.00279462	86.4769	0	3.23164e-05	0.00273118	0.00285805	2.35444e-95	0.181199	0	79.6356	0	0
weighted_mo	Weighted-mean MO in tract anterior thalamic radiation (right)	MH	0.761232	0	0.807862	58.201	0.000677195	41.5165	3.58995e-233	1.63115e-05	0.000645192	0.000709198	0.00190675	58.8295	2.70697e-291	3.24114e-05	0.00184313	0.00197037	0	4.84643e-230	3.6544e-288	33.8865	0	0
weighted_mo	Weighted-mean MO in tract anterior thalamic radiation (right)	LM	-0.199629	3.24487e-25	0.699539	57.4476	-0.000636883	-56.4726	0	1.12777e-05	-0.00065901	-0.000614756	0.000866969	32.5211	1.27863e-148	2.66587e-05	0.00081464	0.000919298	4.38058e-22	0	1.72615e-145	51.9536	0	0
weighted_mo	Weighted-mean MO in tract cingulate gyrus part of cingulum (left)	LH	0.0409306	0.0346109	0.861029	71.6294	-0.000628702	-46.9887	4.81897e-273	1.33799e-05	-0.000654953	-0.000602451	0.00248931	59.711	4.39425e-295	4.16893e-05	0.00240747	0.00257114	1	6.50561e-270	5.93224e-292	71.2139	0	0
weighted_mo	Weighted-mean MO in tract cingulate gyrus part of cingulum (left)	MH	0.397656	1.34116e-101	0.862559	70.4182	-0.000288611	-26.0652	1.015e-118	1.10726e-05	-0.000310335	-0.000266886	0.00249141	63.4897	6.23277748536e-313	3.92412e-05	0.00241438	0.00256844	1.81057e-98	1.37024e-115	8.4142496052364e-310	68.1822	0	0
weighted_mo	Weighted-mean MO in tract cingulate gyrus part of cingulum (left)	LM	-0.8541	0	0.667594	65.9344	-0.000341509	-47.0721	7.13549e-272	7.25501e-06	-0.000355743	-0.000327274	-1.7578e-05	-0.621229	0.534625	2.82954e-05	-7.31198e-05	3.79639e-05	0	9.63292e-269	1	11.0894	0	0
weighted_mo	Weighted-mean MO in tract cingulate gyrus part of cingulum (right)	LH	-0.0570842	0.00319924	0.897825	62.5669	-0.000564321	-36.5085	3.31236e-196	1.54573e-05	-0.000594648	-0.000533994	0.00457924	60.5476	5.29877e-299	7.56304e-05	0.00443078	0.0047277	1	4.47168e-193	7.15334e-296	66.6318	0	0
weighted_mo	Weighted-mean MO in tract cingulate gyrus part of cingulum (right)	MH	0.79005	0	0.898597	69.3562	0.000383757	23.6018	3.09462e-101	1.62596e-05	0.000351856	0.000415658	0.00380537	85.0654	0	4.47346e-05	0.00371756	0.00389318	0	4.17773e-98	0	71.8858	0	0
weighted_mo	Weighted-mean MO in tract cingulate gyrus part of cingulum (right)	LM	-0.76381	0	0.685061	64.3627	-0.000948182	-55.8538	0	1.69761e-05	-0.000981489	-0.000914875	0.000756961	12.207	1.48164e-31	6.20103e-05	0.00063524	0.000878683	0	0	2.00021e-28	26.5218	0	0
weighted_mo	Weighted-mean MO in tract parahippocampal part of cingulum (left)	LH	0.496868	3.46075e-166	0.49231	77.8786	0.000700168	54.3191	0	1.28899e-05	0.000674878	0.000725457	0.000476626	10.4643	4.34868e-24	4.55478e-05	0.000387217	0.000566035	4.67201e-163	0	5.87072e-21	-4.7224	2.33083e-06	0.00314662
weighted_mo	Weighted-mean MO in tract parahippocampal part of cingulum (left)	MH	0.314858	2.31282e-62	0.215371	NA	-3.91144e-06	-0.261792	0.793527	1.4941e-05	-3.32253e-05	2.54024e-05	-0.000807202	-19.2777	3.40056e-68	4.18723e-05	-0.000889395	-0.000725008	3.12231e-59	1	4.59076e-65	-18.0685	0	0
weighted_mo	Weighted-mean MO in tract parahippocampal part of cingulum (left)	LM	0.273119	1.55926e-46	0.396403	56.8673	0.000710826	37.6714	8.05747e-204	1.88691e-05	0.000673805	0.000747848	0.00123086	27.097	2.37243e-115	4.54243e-05	0.0011417	0.00132003	2.105e-43	1.08776e-200	3.20278e-112	10.5725	0	0
weighted_mo	Weighted-mean MO in tract parahippocampal part of cingulum (right)	LH	-0.218657	3.28228e-30	0.455649	67.0129	0.000511491	37.7264	2.70262e-205	1.35579e-05	0.00048489	0.000538091	-0.000366818	-7.60317	8.20554e-14	4.82454e-05	-0.000461523	-0.000272114	4.43107e-27	3.64853e-202	1.10775e-10	-17.5261	0	0
weighted_mo	Weighted-mean MO in tract parahippocampal part of cingulum (right)	MH	-0.147346	2.14121e-14	0.379622	55.1586	-0.000636273	-34.2964	1.55335e-179	1.85522e-05	-0.000672672	-0.000599874	0.000507085	11.0937	1.10677e-26	4.57094e-05	0.000417359	0.000596811	2.89063e-11	2.09703e-176	1.49414e-23	23.1773	0	0
weighted_mo	Weighted-mean MO in tract parahippocampal part of cingulum (right)	LM	-0.167818	3.46893e-18	0.753278	73.3573	0.00114459	61.65	0	1.8566e-05	0.00110817	0.00118102	-0.000864448	-31.7167	1.04382e-143	2.72553e-05	-0.000917948	-0.000810948	4.68306e-15	0	1.40916e-140	-60.9207	0	0
weighted_mo	Weighted-mean MO in tract corticospinal tract (left)	LH	0.725698	0	0.482609	67.5524	0.000342041	29.1167	4.59346e-141	1.17473e-05	0.000318993	0.000365089	9.31925e-05	3.0718	0.00220074	3.03381e-05	3.36396e-05	0.000152745	0	6.20116e-138	1	-7.6491	2.02061e-14	2.72782e-11
weighted_mo	Weighted-mean MO in tract corticospinal tract (left)	MH	0.627704	9.10372e-292	0.519793	69.3784	-5.12585e-05	-6.52279	1.02043e-10	7.85838e-06	-6.66764e-05	-3.58406e-05	-0.000254542	-8.97568	2.0147e-18	2.8359e-05	-0.000310209	-0.000198874	1.229e-288	1.37758e-07	2.71984e-15	-6.90789	4.91918e-12	6.64089e-09
weighted_mo	Weighted-mean MO in tract corticospinal tract (left)	LM	0.259834	3.93866e-42	0.468618	57.7861	0.000393959	51.2302	8.94005e-301	7.68998e-06	0.000378871	0.000409047	0.0003523	20.774	4.95958e-77	1.69587e-05	0.000319011	0.000385589	5.31719e-39	1.20691e-297	6.69543e-74	-2.23724	0.025271	1
weighted_mo	Weighted-mean MO in tract corticospinal tract (right)	LH	0.112456	5.84459e-09	0.354468	NA	0.000446305	35.9627	3.9765e-192	1.24102e-05	0.000421957	0.000470654	-0.000528432	-16.9957	1.90704e-55	3.10922e-05	-0.000589465	-0.000467399	7.8902e-06	5.36828e-189	2.5745e-52	-29.1163	0	0
weighted_mo	Weighted-mean MO in tract corticospinal tract (right)	MH	0.564594	4.33752e-224	0.316513	67.2772	4.44651e-05	4.62871	4.08559e-06	9.60637e-06	2.56177e-05	6.33125e-05	-0.00060457	-14.047	3.48722e-40	4.30391e-05	-0.000689054	-0.000520085	5.85566e-221	0.00551554	4.70774e-37	-14.718	0	0
weighted_mo	Weighted-mean MO in tract corticospinal tract (right)	LM	-0.486243	2.83109e-157	0.597567	64.8947	0.000407999	43.7433	3.75624e-248	9.32711e-06	0.000389699	0.000426298	7.60329e-05	3.64912	0.000280174	2.0836e-05	3.51334e-05	0.000116932	3.82197e-154	5.07092e-245	0.378235	-14.5418	0	0
weighted_mo	Weighted-mean MO in tract forceps major	LH	0.0543729	0.00498987	0.912868	70.0344	-0.000375181	-78.0886	0	4.80455e-06	-0.000384607	-0.000365754	0.00110069	82.6374	0	1.33196e-05	0.00107455	0.00112684	1	0	0	104.231	0	0
weighted_mo	Weighted-mean MO in tract forceps major	MH	-0.140301	3.52331e-13	0.818685	63.7289	-0.000174818	-24.8973	2.30635e-110	7.02155e-06	-0.000188594	-0.000161042	0.00140759	75.7879	0	1.85727e-05	0.00137113	0.00144404	4.75647e-10	3.11358e-107	0	79.6953	0	0
weighted_mo	Weighted-mean MO in tract forceps major	LM	0.0724563	0.000189693	0.199807	67.2884	-0.00020596	-28.6595	3.53813e-137	7.18644e-06	-0.00022006	-0.00019186	-0.000299277	-21.3654	1.60071e-80	1.40075e-05	-0.000326773	-0.000271781	0.256086	4.77647e-134	2.16095e-77	-5.92736	3.07844e-09	4.15589e-06
weighted_mo	Weighted-mean MO in tract forceps minor	LH	0.200481	1.45024e-25	0.772855	55.8727	-5.78125e-05	-6.14149	1.11369e-09	9.41343e-06	-7.62813e-05	-3.93436e-05	0.00209788	56.3303	6.91451e-279	3.72425e-05	0.00202478	0.00217099	1.95782e-22	1.50348e-06	9.33459e-276	56.1178	0	0
weighted_mo	Weighted-mean MO in tract forceps minor	MH	0.719451	0	0.7263	57.288	0.000719312	48.8508	5.79269e-286	1.47247e-05	0.000690423	0.000748202	0.00163758	39.5205	1.62414e-189	4.14363e-05	0.00155624	0.00171892	0	7.82014e-283	2.19258e-186	20.8817	0	0
weighted_mo	Weighted-mean MO in tract forceps minor	LM	-0.425211	8.50879e-117	0.701686	58.0279	-0.000786586	-53.4978	3.6282166e-316	1.47031e-05	-0.000815433	-0.000757738	0.000432697	18.8588	5.89568e-66	2.2944e-05	0.00038766	0.000477734	1.14869e-113	4.89809244117e-313	7.95917e-63	44.7428	0	0
weighted_mo	Weighted-mean MO in tract inferior fronto-occipital fasciculus (left)	LH	0.0463463	0.0167237	0.805157	56.7186	0.000404346	43.7112	2.00139e-249	9.2504e-06	0.000386197	0.000422494	0.00122678	44.3937	7.58356e-217	2.7634e-05	0.00117253	0.00128102	1	2.70187e-246	1.02378e-213	28.2223	0	0
weighted_mo	Weighted-mean MO in tract inferior fronto-occipital fasciculus (left)	MH	0.52083	4.18543e-185	0.619782	55.8345	0.000338031	32.615	5.68393e-167	1.03643e-05	0.000317697	0.000358366	0.000917523	44.5549	5.69992e-218	2.05931e-05	0.0008771	0.000957947	5.65033e-182	7.6733e-164	7.6949e-215	25.1361	0	0
weighted_mo	Weighted-mean MO in tract inferior fronto-occipital fasciculus (left)	LM	-0.489297	1.59306e-159	0.374519	64.121	6.8692e-05	8.68109	1.29988e-17	7.91283e-06	5.3167e-05	8.4217e-05	0.000297468	8.02972	3.47435e-15	3.70458e-05	0.00022475	0.000370186	2.15064e-156	1.75484e-14	4.69037e-12	6.03925	1.54829e-09	2.09019e-06
weighted_mo	Weighted-mean MO in tract inferior fronto-occipital fasciculus (right)	LH	-0.0937825	1.23577e-06	0.685081	66.6745	9.02118e-05	11.0692	3.5929e-27	8.14977e-06	7.42223e-05	0.000106201	0.00114118	31.409	3.65067e-141	3.63329e-05	0.00106986	0.0012125	0.00166828	4.85041e-24	4.9284e-138	28.2247	0	0
weighted_mo	Weighted-mean MO in tract inferior fronto-occipital fasciculus (right)	MH	-0.498052	5.70924e-167	0.711892	NA	-0.000130281	-20.2666	1.25948e-78	6.42837e-06	-0.000142893	-0.000117669	0.00123882	40.0494	1.44872e-192	3.09322e-05	0.0011781	0.00129953	7.70748e-164	1.7003e-75	1.95578e-189	43.3353	0	0
weighted_mo	Weighted-mean MO in tract inferior fronto-occipital fasciculus (right)	LM	0.402391	1.13409e-103	0.342673	NA	0.000218189	27.387	6.51216e-128	7.96686e-06	0.000202558	0.00023382	-0.000107022	-5.03675	5.85208e-07	2.12482e-05	-0.000148731	-6.53133e-05	1.53102e-100	8.79142e-125	0.000790031	-14.3311	0	0
weighted_mo	Weighted-mean MO in tract inferior longitudinal fasciculus (left)	LH	-0.511115	2.47651e-177	0.480081	NA	-0.000333637	-39.771	1.73101e-220	8.38893e-06	-0.000350095	-0.000317178	0.000145875	6.9843	6.07929e-12	2.08861e-05	0.000104876	0.000186874	3.34329e-174	2.33687e-217	8.20704e-09	21.3042	0	0
weighted_mo	Weighted-mean MO in tract inferior longitudinal fasciculus (left)	MH	0.0974092	4.74489e-07	0.426564	65.9259	-0.000386146	-49.6423	1.6228e-291	7.77856e-06	-0.000401407	-0.000370885	-0.000189141	-7.52985	1.3851e-13	2.51188e-05	-0.000238448	-0.000139834	0.00064056	2.19078e-288	1.86988e-10	7.49194	6.79456e-14	9.17266e-11
weighted_mo	Weighted-mean MO in tract inferior longitudinal fasciculus (left)	LM	-0.513806	1.97033e-178	0.365985	67.095	4.37607e-05	4.0415	5.65925e-05	1.08279e-05	2.25165e-05	6.5005e-05	0.000323534	8.73817	1.37e-17	3.70254e-05	0.000250856	0.000396212	2.65995e-175	0.0763999	1.8495e-14	7.25249	4.09228e-13	5.52458e-10
weighted_mo	Weighted-mean MO in tract inferior longitudinal fasciculus (right)	LH	-0.407017	6.99616e-107	0.652362	58.7244	-0.000157234	-20.0999	1.45846e-77	7.82261e-06	-0.000172581	-0.000141886	-0.00090772	-42.8775	2.04161e-208	2.11701e-05	-0.000949276	-0.000866164	9.44481e-104	1.96891e-74	2.75618e-205	-33.2528	0	0
weighted_mo	Weighted-mean MO in tract inferior longitudinal fasciculus (right)	MH	-0.727785	0	0.8842	70.7543	-5.93813e-05	-5.8659	5.79106e-09	1.01231e-05	-7.92426e-05	-3.952e-05	-0.00136979	-73.3571	0	1.86729e-05	-0.00140644	-0.00133313	0	7.81793e-06	0	-61.6941	0	0
weighted_mo	Weighted-mean MO in tract inferior longitudinal fasciculus (right)	LM	0.738762	0	0.698949	70.9394	-9.79102e-05	-12.4398	1.89853e-33	7.87072e-06	-0.000113353	-8.24678e-05	0.000455083	19.9708	2.36339e-72	2.27874e-05	0.000410353	0.000499813	0	2.56302e-30	3.19057e-69	22.9378	0	0
weighted_mo	Weighted-mean MO in tract middle cerebellar peduncle	LH	-0.699687	0	0.82453	69.7294	0.000379259	17.3058	5.30151e-60	2.19151e-05	0.000336262	0.000422255	0.000800856	19.1233	2.75596e-67	4.18785e-05	0.00071865	0.000883062	0	7.15704e-57	3.72055e-64	8.91967	0	0
weighted_mo	Weighted-mean MO in tract middle cerebellar peduncle	MH	0.750864	0	0.733429	56.8666	0.000902132	54.0958	3.56e-322	1.66766e-05	0.000869413	0.000934851	0.00110256	32.3365	6.63269e-147	3.40965e-05	0.00103563	0.00116949	0	4.8023e-319	8.95413e-144	5.28053	1.28813e-07	0.000173898
weighted_mo	Weighted-mean MO in tract middle cerebellar peduncle	LM	-0.906126	0	0.879811	65.0398	-0.000530658	-18.5935	8.737e-68	2.854e-05	-0.000586653	-0.000474662	-0.000323139	-9.17828	3.6424e-19	3.52069e-05	-0.000392248	-0.000254031	0	1.1795e-64	4.91725e-16	4.57879	4.67683e-06	0.00631371
weighted_mo	Weighted-mean MO in tract medial lemniscus (left)	LH	-0.802647	0	0.697235	67.5694	7.79791e-05	6.97167	5.18805e-12	1.11851e-05	5.60342e-05	9.99239e-05	-0.000398774	-17.4769	4.50606e-58	2.28172e-05	-0.000443564	-0.000353985	0	7.00387e-09	6.08318e-55	-18.7615	0	0
weighted_mo	Weighted-mean MO in tract medial lemniscus (left)	MH	-0.654763	0	0.502689	64.4807	8.82593e-05	9.69997	1.85259e-21	9.09892e-06	7.04074e-05	0.000106111	-3.43214e-05	-2.53155	0.0115483	1.35574e-05	-6.09341e-05	-7.70859e-06	0	2.50099e-18	1	-7.50751	6.01741e-14	8.1235e-11
weighted_mo	Weighted-mean MO in tract medial lemniscus (left)	LM	-0.588297	1.80133e-246	0.379857	71.5923	-1.80871e-05	-1.67577	0.0940517	1.07933e-05	-3.92636e-05	3.08939e-06	-0.000358151	-14.428	4.00647e-42	2.48233e-05	-0.000406877	-0.000309424	2.43179e-243	1	5.40873e-39	-12.5632	0	0
weighted_mo	Weighted-mean MO in tract medial lemniscus (right)	LH	0.603379	4.47916e-264	0.503604	NA	5.53677e-05	8.96188	1.21153e-18	6.17813e-06	4.32464e-05	6.7489e-05	-0.000390985	-21.2359	1.58367e-79	1.84115e-05	-0.000427126	-0.000354844	6.04687e-261	1.63556e-15	2.13795e-76	-22.9837	0	0
weighted_mo	Weighted-mean MO in tract medial lemniscus (right)	MH	0.422744	6.28379e-116	0.602181	NA	0.0003028	34.1584	1.67293e-178	8.86461e-06	0.000285408	0.000320192	-0.000779483	-28.1276	3.06008e-121	2.77124e-05	-0.000833881	-0.000725084	8.48312e-113	2.25845e-175	4.13111e-118	-37.1974	0	0
weighted_mo	Weighted-mean MO in tract medial lemniscus (right)	LM	0.0317042	0.102805	0.43179	68.4248	-0.00025072	-23.7113	9.45147e-102	1.05738e-05	-0.000271465	-0.000229974	0.000388127	22.7846	5.03582e-89	1.70346e-05	0.000354689	0.000421564	1	1.27595e-98	6.79836e-86	31.8634	0	0
weighted_mo	Weighted-mean MO in tract posterior thalamic radiation (left)	LH	0.897489	0	0.901701	63.4663	6.99874e-05	7.93232	4.9418e-15	8.82307e-06	5.26769e-05	8.7298e-05	0.000761217	31.3278	1.13668e-140	2.42985e-05	0.00071352	0.000808914	0	6.67143e-12	1.53452e-137	26.7392	0	0
weighted_mo	Weighted-mean MO in tract posterior thalamic radiation (left)	MH	0.914867	0	0.904038	55.7864	0.000191056	20.0067	6.26851e-77	9.5496e-06	0.00017232	0.000209792	0.00164727	65.6553	1.2e-322	2.50897e-05	0.00159802	0.00169652	0	8.46249e-74	1.60077e-319	54.2441	0	0
weighted_mo	Weighted-mean MO in tract posterior thalamic radiation (left)	LM	0.0425426	0.0285564	0.280699	NA	-0.00012353	-11.2326	7.18068e-28	1.09975e-05	-0.000145107	-0.000101953	-0.000881879	-26.3189	1.44948e-110	3.35075e-05	-0.000947651	-0.000816106	1	9.69391e-25	1.95679e-107	-21.5037	0	0
weighted_mo	Weighted-mean MO in tract posterior thalamic radiation (right)	LH	0.259122	3.81619e-42	0.435614	69.0523	-0.000164238	-12.454	1.50568e-33	1.31876e-05	-0.000190112	-0.000138365	0.00106912	29.3581	1.12975e-128	3.64164e-05	0.000997633	0.0011406	5.15185e-39	2.03266e-30	1.52516e-125	31.8444	0	0
weighted_mo	Weighted-mean MO in tract posterior thalamic radiation (right)	MH	-0.0677064	0.000471739	0.287712	NA	0.000448465	34.2341	4.5439e-179	1.31e-05	0.000422763	0.000474167	0.000918244	24.6934	2.78204e-100	3.71858e-05	0.00084525	0.000991238	0.636848	6.13426e-176	3.75575e-97	11.9155	0	0
weighted_mo	Weighted-mean MO in tract posterior thalamic radiation (right)	LM	0.381176	2.32822e-92	0.589641	71.2296	-0.000618313	-42	1.51392e-235	1.47217e-05	-0.000647197	-0.000589429	0.000139625	6.30618	4.72121e-10	2.2141e-05	9.61638e-05	0.000183086	3.1431e-89	2.04379e-232	6.37364e-07	28.5061	0	0
weighted_mo	Weighted-mean MO in tract superior longitudinal fasciculus (left)	LH	-0.907229	0	0.886548	62.8811	-0.000670401	-32.9696	9.85408e-170	2.03339e-05	-0.000710296	-0.000630507	-0.000432795	-10.417	6.73806e-24	4.1547e-05	-0.00051435	-0.000351239	0	1.3303e-166	9.09638e-21	5.13677	2.79498e-07	0.000377322
weighted_mo	Weighted-mean MO in tract superior longitudinal fasciculus (left)	MH	-0.924435	0	0.849949	64.0704	-0.000528851	-30.2809	1.35232e-149	1.74649e-05	-0.000563117	-0.000494586	-0.00158009	-35.1913	4.46721e-164	4.49002e-05	-0.00166823	-0.00149196	0	1.82564e-146	6.03074e-161	-21.8203	0	0
weighted_mo	Weighted-mean MO in tract superior longitudinal fasciculus (left)	LM	-0.541074	2.27887e-201	0.663715	62.3317	-0.000151348	-6.58188	7.00475e-11	2.29946e-05	-0.000196464	-0.000106233	0.00112917	28.9419	1.02546e-126	3.90149e-05	0.00105258	0.00120575	3.07647e-198	9.45641e-08	1.38437e-123	28.2755	0	0
weighted_mo	Weighted-mean MO in tract superior longitudinal fasciculus (right)	LH	-0.751373	0	0.861528	67.9319	0.000315994	26.3381	9.52279e-121	1.19976e-05	0.000292455	0.000339533	-0.00106693	-32.4295	2.38895e-147	3.28999e-05	-0.00113151	-0.00100234	0	1.28558e-117	3.22509e-144	-39.4903	0	0
weighted_mo	Weighted-mean MO in tract superior longitudinal fasciculus (right)	MH	0.417748	5.62492e-113	0.618851	58.4707	0.000977702	64.4607	0	1.51674e-05	0.000947944	0.00100746	-0.00051566	-12.2037	1.64584e-31	4.22545e-05	-0.000598604	-0.000432716	7.59364e-110	0	2.22189e-28	-33.264	0	0
weighted_mo	Weighted-mean MO in tract superior longitudinal fasciculus (right)	LM	-0.966295	0	0.922522	62.6702	-0.000657943	-51.3713	9.66991e-302	1.28076e-05	-0.000683071	-0.000632814	-0.000546464	-18.2729	1.21667e-62	2.99057e-05	-0.000605167	-0.000487762	0	1.30544e-298	1.6425e-59	3.42665	0.000611083	0.824962
weighted_mo	Weighted-mean MO in tract superior thalamic radiation (left)	LH	-0.407069	6.53846e-107	0.810931	55.0027	0.000155971	8.73789	7.96048e-18	1.78499e-05	0.00012095	0.000190992	-0.00196163	-48.4646	7.1768e-239	4.04755e-05	-0.00204108	-0.00188218	8.82692e-104	1.07466e-14	9.68868e-236	-47.8697	0	0
weighted_mo	Weighted-mean MO in tract superior thalamic radiation (left)	MH	-0.589691	3.22869e-249	0.827289	55.0192	-0.000194611	-12.7193	7.86615e-35	1.53005e-05	-0.00022463	-0.000164592	-0.00275185	-56.8918	5.63444e-282	4.83699e-05	-0.0028468	-0.0026569	4.35874e-246	1.06193e-31	7.60649e-279	-50.4066	0	0
weighted_mo	Weighted-mean MO in tract superior thalamic radiation (left)	LM	0.353401	9.10824e-79	0.140019	55.0055	0.000359075	14.7552	2.64887e-45	2.43355e-05	0.000311329	0.000406821	0.000750717	19.2041	6.2836e-68	3.90915e-05	0.000673984	0.000827451	1.22961e-75	3.57598e-42	8.48285e-65	8.5052	0	0
weighted_mo	Weighted-mean MO in tract superior thalamic radiation (right)	LH	0.443975	3.875e-129	0.798289	66.2231	9.80035e-05	4.05711	5.29332e-05	2.4156e-05	5.06103e-05	0.000145397	-0.00269083	-40.2496	1.5951e-193	6.68537e-05	-0.00282207	-0.0025596	5.23124e-126	0.0714598	2.15338e-190	-39.233	0	0
weighted_mo	Weighted-mean MO in tract superior thalamic radiation (right)	MH	0.378548	1.73738e-91	0.693275	NA	6.98016e-05	4.69665	2.95404e-06	1.4862e-05	4.06428e-05	9.89604e-05	-0.00237234	-44.1792	6.81741e-216	5.36982e-05	-0.00247775	-0.00226693	2.34546e-88	0.00398796	9.2035e-213	-43.8313	0	0
weighted_mo	Weighted-mean MO in tract superior thalamic radiation (right)	LM	0.320135	3.41539e-64	0.271996	60.0589	3.49619e-05	1.4434	0.149177	2.42219e-05	-1.25615e-05	8.24852e-05	-0.000292109	-6.75022	2.83075e-11	4.3274e-05	-0.000377053	-0.000207165	4.61077e-61	1	3.82151e-08	-6.59527	4.2448e-11	5.73049e-08
weighted_mo	Weighted-mean MO in tract uncinate fasciculus (left)	LH	0.075508	9.55041e-05	0.166569	59.7182	0.000182889	14.8259	9.50854e-46	1.23358e-05	0.000158687	0.000207091	-0.000274837	-7.16398	1.79779e-12	3.83637e-05	-0.000350143	-0.00019953	0.128931	1.28365e-42	2.42702e-09	-11.3585	0	0
weighted_mo	Weighted-mean MO in tract uncinate fasciculus (left)	MH	0.47473	8.97936e-150	0.464606	56.0761	0.000144499	13.7055	8.65439e-40	1.05431e-05	0.000123814	0.000165185	0.000671522	28.2871	3.23361e-122	2.37395e-05	0.000624922	0.000718121	1.21221e-146	1.16834e-36	4.36537e-119	20.2893	0	0
weighted_mo	Weighted-mean MO in tract uncinate fasciculus (left)	LM	-0.151025	5.53159e-15	0.343934	66.3696	3.41575e-05	2.73563	0.00632056	1.24862e-05	9.65966e-06	5.86554e-05	-0.000937899	-22.3336	2.58141e-86	4.19949e-05	-0.00102033	-0.000855466	7.46765e-12	1	3.4849e-83	-22.1871	0	0
weighted_mo	Weighted-mean MO in tract uncinate fasciculus (right)	LH	0.427563	6.54076e-119	0.736492	59.6669	0.00034113	29.1904	1.31113e-141	1.16864e-05	0.000318202	0.000364058	0.00160176	36.6661	1.12589e-172	4.3685e-05	0.00151601	0.00168751	8.83003e-116	1.77002e-138	1.51995e-169	27.877	0	0
weighted_mo	Weighted-mean MO in tract uncinate fasciculus (right)	MH	0.81654	0	0.81416	70.2473	0.000200999	25.9226	1.07835e-117	7.75383e-06	0.000185787	0.000216212	0.00125923	49.5223	9.90689e-245	2.54275e-05	0.00120932	0.00130914	0	1.45577e-114	1.33743e-241	39.8078	0	0
weighted_mo	Weighted-mean MO in tract uncinate fasciculus (right)	LM	-0.4032	4.03815e-104	0.407674	66.6597	0.000137437	12.8611	1.70082e-35	1.06863e-05	0.000116471	0.000158403	0.00032263	9.37337	6.95728e-20	3.44199e-05	0.000255067	0.000390194	5.4515e-101	2.2961e-32	9.39232e-17	5.13846	2.76993e-07	0.000373941
weighted_icvf	Weighted-mean ICVF in tract acoustic radiation (left)	LH	-0.553944	3.18571e-214	0.879828	63.2194	-0.000191133	-43.2949	2.15307e-246	4.41468e-06	-0.000199794	-0.000182472	0.00163831	52.3401	5.30156e-259	3.13012e-05	0.00157687	0.00169975	4.30071e-211	2.90664e-243	7.1571e-256	57.8736	0	0
weighted_icvf	Weighted-mean ICVF in tract acoustic radiation (left)	MH	-0.287437	7.9617e-52	0.883605	63.7289	-0.000359005	-53.8638	1.3577e-320	6.66504e-06	-0.000372081	-0.000345928	0.00171871	61.1955	2.05536e-302	2.80855e-05	0.00166358	0.00177384	1.07483e-48	1.8328847e-317	2.77474e-299	71.979	0	0
weighted_icvf	Weighted-mean ICVF in tract acoustic radiation (left)	LM	-0.705909	0	0.758633	61.1469	0.000166549	21.4971	1.29574e-86	7.74751e-06	0.000151348	0.000181749	-9.78469e-05	-8.08167	2.34546e-15	1.21073e-05	-0.000121613	-7.40812e-05	0	1.74925e-83	3.16637e-12	-18.3941	0	0
weighted_icvf	Weighted-mean ICVF in tract acoustic radiation (right)	LH	-0.372307	2.15915e-88	0.831561	64.1852	3.15234e-05	5.84374	6.58834e-09	5.39439e-06	2.09398e-05	4.2107e-05	0.00179405	51.1917	4.02852e-253	3.50457e-05	0.00172526	0.00186284	2.91485e-85	8.89426e-06	5.4385e-250	49.7068	0	0
weighted_icvf	Weighted-mean ICVF in tract acoustic radiation (right)	MH	-0.379417	6.23026e-92	0.855139	65.443	-0.000155864	-26.2457	5.08282e-120	5.93868e-06	-0.000167516	-0.000144213	0.00175538	60.6716	5.63698e-300	2.89326e-05	0.00169859	0.00181218	8.41086e-89	6.86181e-117	7.60992e-297	64.7097	0	0
weighted_icvf	Weighted-mean ICVF in tract acoustic radiation (right)	LM	-0.13586	2.19046e-12	0.394929	62.5977	0.000188889	29.5462	1.12242e-143	6.393e-06	0.000176346	0.000201432	2.20597e-05	1.64934	0.0994703	1.33749e-05	-4.19423e-06	4.83136e-05	2.95712e-09	1.51527e-140	1	-11.2538	0	0
weighted_icvf	Weighted-mean ICVF in tract anterior thalamic radiation (left)	LH	-0.0513365	0.008033	0.86537	62.7844	-2.48304e-05	-5.65627	1.93751e-08	4.38989e-06	-3.34432e-05	-1.62176e-05	0.00157339	53.617	1.85836e-265	2.9345e-05	0.00151579	0.001631	1	2.61564e-05	2.50878e-262	53.8638	0	0
weighted_icvf	Weighted-mean ICVF in tract anterior thalamic radiation (left)	MH	-0.0130604	0.500513	0.846279	NA	-0.000255467	-36.1872	1.15835e-193	7.05959e-06	-0.000269318	-0.000241616	0.0016377	55.8294	8.7501e-277	2.93341e-05	0.00158012	0.00169529	1	1.56377e-190	1.18126e-273	62.7468	0	0
weighted_icvf	Weighted-mean ICVF in tract anterior thalamic radiation (left)	LM	-0.0441591	0.0230361	0.380971	63.1296	0.000233165	31.1924	8.22808e-156	7.47506e-06	0.000218499	0.000247831	-7.81409e-05	-5.55379	3.8029e-08	1.40698e-05	-0.000105759	-5.05228e-05	1	1.11079e-152	5.13392e-05	-19.5394	0	0
weighted_icvf	Weighted-mean ICVF in tract anterior thalamic radiation (right)	LH	-0.155238	7.68717e-16	0.852391	65.0077	-3.31775e-05	-8.1361	1.02197e-15	4.07781e-06	-4.1178e-05	-2.51769e-05	0.00153065	56.0647	1.37268e-277	2.73015e-05	0.00147706	0.00158424	1.03777e-12	1.37966e-12	1.85311e-274	56.6514	0	0
weighted_icvf	Weighted-mean ICVF in tract anterior thalamic radiation (right)	MH	-0.176488	4.49996e-20	0.822233	NA	-0.000225979	-38.5068	6.14751e-211	5.86854e-06	-0.000237492	-0.000214465	0.0012851	52.9734	1.55866e-262	2.42593e-05	0.00123748	0.00133272	6.07494e-17	8.29914e-208	2.10419e-259	60.5422	0	0
weighted_icvf	Weighted-mean ICVF in tract anterior thalamic radiation (right)	LM	0.22149	8.49467e-31	0.438246	78.6767	0.000195832	31.7777	3.8526e-160	6.16256e-06	0.000183741	0.000207923	0.000228479	19.2909	2.0634e-68	1.18439e-05	0.000205231	0.000251728	1.14678e-27	5.20101e-157	2.78559e-65	2.44528	0.014474	1
weighted_icvf	Weighted-mean ICVF in tract cingulate gyrus part of cingulum (left)	LH	0.139255	5.17237e-13	0.507006	74.1788	8.7071e-05	13.3661	4.65736e-38	6.51433e-06	7.42901e-05	9.98519e-05	0.00117064	33.2156	4.2955e-152	3.52437e-05	0.00110146	0.00123982	6.98269e-10	6.28744e-35	5.79892e-149	30.233	0	0
weighted_icvf	Weighted-mean ICVF in tract cingulate gyrus part of cingulum (left)	MH	-0.350293	9.98096e-78	0.450521	NA	-0.00016922	-21.4153	3.01141e-86	7.90184e-06	-0.000184723	-0.000153717	0.000955802	29.9739	1.57411e-132	3.18878e-05	0.000893207	0.0010184	1.34743e-74	4.0654e-83	2.12505e-129	34.2449	0	0
weighted_icvf	Weighted-mean ICVF in tract cingulate gyrus part of cingulum (left)	LM	0.513884	1.70553e-178	0.408611	NA	0.000259066	35.2152	1.23207e-185	7.35667e-06	0.000244633	0.0002735	0.000191695	8.93945	2.654e-18	2.14437e-05	0.000149603	0.000233788	2.30247e-175	1.66329e-182	3.58291e-15	-2.97174	0.00296117	1
weighted_icvf	Weighted-mean ICVF in tract cingulate gyrus part of cingulum (right)	LH	-0.292109	1.40276e-53	0.801334	60.0809	-0.000147112	-21.5488	3.5387e-87	6.82693e-06	-0.000160506	-0.000133718	0.00183483	50.456	2.56815e-249	3.63648e-05	0.00176344	0.00190621	1.89372e-50	4.77725e-84	3.467e-246	53.5657	0	0
weighted_icvf	Weighted-mean ICVF in tract cingulate gyrus part of cingulum (right)	MH	0.164552	1.275e-17	0.791201	66.5101	-0.00022937	-29.9628	3.07737e-147	7.65516e-06	-0.000244389	-0.000214351	0.00145973	52.3583	2.0826e-259	2.78797e-05	0.00140501	0.00151446	1.72125e-14	4.15446e-144	2.81151e-256	58.4231	0	0
weighted_icvf	Weighted-mean ICVF in tract cingulate gyrus part of cingulum (right)	LM	-0.576511	1.60985e-234	0.489512	60.4699	8.22912e-05	10.5421	6.97979e-25	7.80595e-06	6.6976e-05	9.76065e-05	0.000351256	14.1142	1.45076e-40	2.48868e-05	0.000302405	0.000400107	2.1733e-231	9.42272e-22	1.95853e-37	10.3122	0	0
weighted_icvf	Weighted-mean ICVF in tract parahippocampal part of cingulum (left)	LH	0.766209	0	0.928542	57.3967	0.000216733	30.8172	1.13485e-153	7.03285e-06	0.000202935	0.000230531	0.00128254	78.3563	0	1.63681e-05	0.00125041	0.00131467	0	1.53205e-150	0	59.8265	0	0
weighted_icvf	Weighted-mean ICVF in tract parahippocampal part of cingulum (left)	MH	0.764334	0	0.875791	55.2014	0.000153616	20.8187	2.89275e-82	7.37878e-06	0.000139139	0.000168093	0.00142399	65.5003	6.13e-322	2.17402e-05	0.00138132	0.00146667	0	3.90521e-79	8.27066e-319	55.334	0	0
weighted_icvf	Weighted-mean ICVF in tract parahippocampal part of cingulum (left)	LM	0.0332853	0.0867479	0.0183851	NA	5.96286e-05	5.88083	5.32581e-09	1.01395e-05	3.97349e-05	7.95223e-05	-0.000145402	-10.7573	2.64714e-25	1.35165e-05	-0.000171934	-0.00011887	1	7.18984e-06	3.57364e-22	-12.1342	0	0
weighted_icvf	Weighted-mean ICVF in tract parahippocampal part of cingulum (right)	LH	-0.435626	7.26481e-124	0.716643	67.2545	3.41762e-05	5.3009	1.37325e-07	6.44725e-06	2.1527e-05	4.68255e-05	0.00081935	38.6982	1.43198e-184	2.11728e-05	0.000777788	0.000860912	9.80749e-121	0.000185389	1.93317e-181	35.4758	0	0
weighted_icvf	Weighted-mean ICVF in tract parahippocampal part of cingulum (right)	MH	-0.215578	2.26244e-29	0.721367	NA	-0.000256462	-29.0534	1.61685e-140	8.82727e-06	-0.000273781	-0.000239144	0.000741247	58.5354	6.82807e-290	1.26632e-05	0.00071639	0.000766105	3.05429e-26	2.18274e-137	9.21789e-287	64.6342	0	0
weighted_icvf	Weighted-mean ICVF in tract parahippocampal part of cingulum (right)	LM	-0.199082	4.39403e-25	0.426647	66.829	0.000287576	25.1475	7.61537e-112	1.14356e-05	0.00026514	0.000310013	6.7042e-05	4.34128	1.59782e-05	1.54429e-05	3.67287e-05	9.73552e-05	5.93194e-22	1.02808e-108	0.0215705	-11.4766	0	0
weighted_icvf	Weighted-mean ICVF in tract corticospinal tract (left)	LH	0.323289	6.97527e-66	0.863968	58.8936	6.48056e-05	17.4907	4.05507e-61	3.70516e-06	5.75363e-05	7.2075e-05	0.00109243	58.092	2.12126e-287	1.88053e-05	0.00105552	0.00112935	9.41662e-63	5.47434e-58	2.8637e-284	53.6151	0	0
weighted_icvf	Weighted-mean ICVF in tract corticospinal tract (left)	MH	0.483279	6.36699e-156	0.851213	55.0137	-2.0618e-06	-0.50202	0.615747	4.107e-06	-1.01196e-05	5.99602e-06	0.00106188	59.272	2.14469e-293	1.79154e-05	0.00102671	0.00109705	8.59544e-153	1	2.89534e-290	57.8856	0	0
weighted_icvf	Weighted-mean ICVF in tract corticospinal tract (left)	LM	-0.396641	1.59606e-100	0.248351	61.4613	6.72046e-05	11.5013	4.49278e-29	5.8432e-06	5.57403e-05	7.8669e-05	2.14167e-05	2.13755	0.0328549	1.00193e-05	1.74962e-06	4.10838e-05	2.15467e-97	6.06526e-26	1	-3.94769	7.89078e-05	0.106526
weighted_icvf	Weighted-mean ICVF in tract corticospinal tract (right)	LH	0.291007	3.58763e-53	0.883232	56.9106	-1.44611e-05	-3.80915	0.000146588	3.79642e-06	-2.19096e-05	-7.0127e-06	0.00134932	54.5017	7.04262e-270	2.47573e-05	0.00130072	0.00139791	4.8433e-50	0.197893	9.50753e-267	54.4493	0	0
weighted_icvf	Weighted-mean ICVF in tract corticospinal tract (right)	MH	0.368932	1.1991e-86	0.839655	55.0137	-4.25742e-05	-9.58885	5.05626e-21	4.43997e-06	-5.12853e-05	-3.38631e-05	0.00115106	57.5959	2.19979e-285	1.99851e-05	0.00111183	0.00119029	1.61878e-83	6.82594e-18	2.96972e-282	58.3047	0	0
weighted_icvf	Weighted-mean ICVF in tract corticospinal tract (right)	LM	-0.0108315	0.577368	0.253691	60.8568	2.68365e-05	4.48243	8.1068e-06	5.98705e-06	1.50899e-05	3.85831e-05	0.000186321	13.9792	6.69494e-40	1.33285e-05	0.000160158	0.000212484	1	0.0109442	9.03817e-37	10.9151	0	0
weighted_icvf	Weighted-mean ICVF in tract forceps major	LH	-0.198852	3.60404e-25	0.789317	NA	3.27901e-05	6.53927	9.167e-11	5.01433e-06	2.29521e-05	4.2628e-05	0.00106805	56.3998	3.16976e-279	1.89372e-05	0.00103088	0.00110523	4.86546e-22	1.23754e-07	4.27918e-276	52.847	0	0
weighted_icvf	Weighted-mean ICVF in tract forceps major	MH	0.162943	2.64633e-17	0.911012	55.0192	-0.000121289	-21.1607	1.52895e-84	5.7318e-06	-0.000132535	-0.000110043	0.00195292	84.0115	0	2.32459e-05	0.00190729	0.00199855	3.57254e-14	2.06408e-81	0	86.6344	0	0
weighted_icvf	Weighted-mean ICVF in tract forceps major	LM	-0.532225	1.07834e-193	0.83952	69.0535	0.000154422	22.3418	2.54899e-92	6.91179e-06	0.000140861	0.000167983	-0.000891167	-54.9912	1.67818e-274	1.62056e-05	-0.000922978	-0.000859357	1.45577e-190	3.44113e-89	2.26554e-271	-59.3476	0	0
weighted_icvf	Weighted-mean ICVF in tract forceps minor	LH	-0.19871	3.89941e-25	0.906163	57.7336	-0.000412407	-62.9184	0	6.55464e-06	-0.000425267	-0.000399547	0.00152084	73.3691	0	2.07286e-05	0.00148015	0.00156153	5.2642e-22	0	0	88.9247	0	0
weighted_icvf	Weighted-mean ICVF in tract forceps minor	MH	-0.0689366	0.000370873	0.925414	62.767	-0.000460691	-67.5954	0	6.81542e-06	-0.000474063	-0.00044732	0.00193539	80.9846	0	2.38983e-05	0.00188848	0.0019823	0.500678	0	0	96.4176	0	0
weighted_icvf	Weighted-mean ICVF in tract forceps minor	LM	-0.398204	2.25676e-101	0.530137	65.4266	5.27759e-05	8.24537	4.39691e-16	6.40067e-06	4.02178e-05	6.5334e-05	-0.000426679	-25.5263	1.06185e-105	1.67153e-05	-0.00045949	-0.000393868	3.04663e-98	5.93583e-13	1.4335e-102	-26.7869	0	0
weighted_icvf	Weighted-mean ICVF in tract inferior fronto-occipital fasciculus (left)	LH	-0.550307	7.03024e-211	0.86837	63.9202	-0.000111983	-21.7529	1.47987e-88	5.14795e-06	-0.000122083	-0.000101883	0.00129192	45.2747	1.09018e-221	2.85351e-05	0.00123591	0.00134793	9.49083e-208	1.99783e-85	1.47174e-218	48.4175	0	0
weighted_icvf	Weighted-mean ICVF in tract inferior fronto-occipital fasciculus (left)	MH	-0.374694	1.58088e-89	0.892286	66.2397	-0.00034925	-52.3026	6.0155356499195e-310	6.67749e-06	-0.000362351	-0.000336149	0.00183367	57.4756	8.3769e-285	3.19035e-05	0.00177105	0.0018963	2.13418e-86	8.12097e-307	1.13088e-281	66.9714	0	0
weighted_icvf	Weighted-mean ICVF in tract inferior fronto-occipital fasciculus (left)	LM	-0.18969	6.99289e-23	0.603109	64.8463	0.00023947	34.4012	1.348e-179	6.9611e-06	0.000225813	0.000253128	-0.000555567	-27.6999	4.59513e-119	2.00566e-05	-0.000594937	-0.000516198	9.4404e-20	1.8198e-176	6.20342e-116	-37.4482	0	0
weighted_icvf	Weighted-mean ICVF in tract inferior fronto-occipital fasciculus (right)	LH	-0.574096	1.60546e-233	0.785032	63.8719	-0.000104261	-22.143	3.31649e-91	4.70854e-06	-0.000113499	-9.5023e-05	0.00125459	39.7343	1.4578e-190	3.15744e-05	0.00119261	0.00131657	2.16737e-230	4.47726e-88	1.96803e-187	42.5657	0	0
weighted_icvf	Weighted-mean ICVF in tract inferior fronto-occipital fasciculus (right)	MH	-0.406466	1.71797e-106	0.855587	NA	-0.000352162	-48.1281	7.22831e-281	7.31718e-06	-0.000366518	-0.000337806	0.00158912	56.4196	1.12378e-279	2.81661e-05	0.00153383	0.00164441	2.31926e-103	9.75822e-278	1.5171e-276	66.7084	0	0
weighted_icvf	Weighted-mean ICVF in tract inferior fronto-occipital fasciculus (right)	LM	-0.0279715	0.150079	0.501535	64.7254	0.000250433	36.2847	1.45321e-193	6.90189e-06	0.000236892	0.000263975	-0.000349411	-19.3336	1.13502e-68	1.80727e-05	-0.000384886	-0.000313935	1	1.96183e-190	1.53227e-65	-31.0065	0	0
weighted_icvf	Weighted-mean ICVF in tract inferior longitudinal fasciculus (left)	LH	-0.293112	5.94527e-54	0.857222	65.1769	-6.58436e-05	-10.9854	8.36763e-27	5.99374e-06	-7.76031e-05	-5.40841e-05	0.00157125	45.2423	1.64123e-221	3.47297e-05	0.00150308	0.00163942	8.02612e-51	1.12963e-23	2.21566e-218	46.4515	0	0
weighted_icvf	Weighted-mean ICVF in tract inferior longitudinal fasciculus (left)	MH	-0.402318	3.60298e-104	0.88637	67.9055	-0.000280132	-45.5877	9.28791e-263	6.14491e-06	-0.000292188	-0.000268076	0.0018123	53.4162	9.00873e-265	3.39278e-05	0.0017457	0.0018789	4.86402e-101	1.25387e-259	1.21618e-261	60.6856	0	0
weighted_icvf	Weighted-mean ICVF in tract inferior longitudinal fasciculus (left)	LM	0.380258	6.88878e-92	0.335375	NA	0.000215921	27.6673	6.02775e-130	7.80421e-06	0.00020061	0.000231233	-0.000251043	-13.8762	2.1149e-39	1.80917e-05	-0.000286556	-0.00021553	9.29985e-89	8.13747e-127	2.85512e-36	-23.7	0	0
weighted_icvf	Weighted-mean ICVF in tract inferior longitudinal fasciculus (right)	LH	-0.48849	7.08355e-160	0.737497	67.5694	4.68511e-05	8.77473	5.85698e-18	5.33931e-06	3.63755e-05	5.73266e-05	0.000862485	36.2703	2.45195e-170	2.37794e-05	0.000815807	0.000909164	9.56279e-157	7.90692e-15	3.31014e-167	33.4668	0	0
weighted_icvf	Weighted-mean ICVF in tract inferior longitudinal fasciculus (right)	MH	-0.381921	3.18528e-93	0.852567	NA	-0.000316241	-50.9973	5.99422e-301	6.20113e-06	-0.000328407	-0.000304074	0.00134798	56.8897	5.76838e-282	2.36946e-05	0.00130146	0.00139449	4.30013e-90	8.0922e-298	7.78732e-279	67.9478	0	0
weighted_icvf	Weighted-mean ICVF in tract inferior longitudinal fasciculus (right)	LM	0.0224345	0.248391	0.608073	NA	0.000366216	45.3544	1.0811e-259	8.07455e-06	0.000350374	0.000382058	-0.000490977	-25.2428	6.21533e-104	1.94502e-05	-0.000529157	-0.000452798	1	1.45948e-256	8.3907e-101	-40.7031	0	0
weighted_icvf	Weighted-mean ICVF in tract middle cerebellar peduncle	LH	0.542657	5.59002e-204	0.799218	56.8407	0.000170578	30.7755	2.32166e-153	5.54267e-06	0.000159704	0.000181453	0.000907075	41.0079	7.40329e-198	2.21195e-05	0.000863655	0.000950495	7.54653e-201	3.13425e-150	9.99445e-195	32.2977	0	0
weighted_icvf	Weighted-mean ICVF in tract middle cerebellar peduncle	MH	-0.437692	4.59735e-125	0.770433	NA	-5.1016e-05	-11.761	2.79536e-30	4.33773e-06	-5.95265e-05	-4.25055e-05	0.000749589	33.5326	3.93694e-154	2.2354e-05	0.000705709	0.000793469	6.20642e-122	3.77374e-27	5.31487e-151	35.159	0	0
weighted_icvf	Weighted-mean ICVF in tract middle cerebellar peduncle	LM	0.867028	0	0.783981	66.3454	0.000223454	51.8216	8.15176e-305	4.31199e-06	0.000214994	0.000231914	0.000150473	15.2365	3.14765e-46	9.87584e-06	0.000131088	0.000169859	0	1.10049e-301	4.24933e-43	-6.77243	1.26639e-11	1.70962e-08
weighted_icvf	Weighted-mean ICVF in tract medial lemniscus (left)	LH	-0.237611	1.60141e-35	0.783302	66.553	-3.0881e-05	-10.3987	2.68191e-24	2.96969e-06	-3.67075e-05	-2.50546e-05	0.000691875	47.7035	8.03895e-235	1.45037e-05	0.000663405	0.000720346	2.1619e-32	3.62058e-21	1.08526e-231	48.8198	0	0
weighted_icvf	Weighted-mean ICVF in tract medial lemniscus (left)	MH	-0.84132	0	0.69182	76.162	-9.83532e-05	-25.2639	5.65261e-113	3.89304e-06	-0.000105991	-9.07152e-05	-0.000127912	-15.7876	5.06749e-49	8.10205e-06	-0.000143816	-0.000112008	0	7.63103e-110	6.84111e-46	-3.28839	0.00100764	1
weighted_icvf	Weighted-mean ICVF in tract medial lemniscus (left)	LM	0.494547	1.90867e-163	0.902326	72.8254	6.78975e-05	16.5921	1.14393e-55	4.09216e-06	5.98686e-05	7.59263e-05	0.000804977	81.7104	0	9.85159e-06	0.000785639	0.000824315	2.57671e-160	1.54431e-52	0	69.0946	0	0
weighted_icvf	Weighted-mean ICVF in tract medial lemniscus (right)	LH	-0.309321	3.47289e-60	0.87362	65.6836	-1.42754e-05	-3.75991	0.000178259	3.79673e-06	-2.17244e-05	-6.82631e-06	0.00117796	52.661	1.24178e-260	2.23687e-05	0.00113405	0.00122187	4.6884e-57	0.24065	1.6764e-257	52.5476	0	0
weighted_icvf	Weighted-mean ICVF in tract medial lemniscus (right)	MH	-0.70796	0	0.764081	68.6056	-7.10833e-05	-17.189	2.76182e-59	4.13539e-06	-7.91968e-05	-6.29698e-05	0.000538786	24.9523	7.44642e-102	2.15926e-05	0.000496401	0.000581172	0	3.72846e-56	1.00527e-98	27.7402	0	0
weighted_icvf	Weighted-mean ICVF in tract medial lemniscus (right)	LM	0.632307	8.96436e-296	0.847625	71.8099	5.79987e-05	14.7932	1.64639e-45	3.92062e-06	5.03064e-05	6.56909e-05	0.000627003	82.4497	0	7.60467e-06	0.000612076	0.000641931	1.21019e-292	2.22263e-42	0	66.5049	0	0
weighted_icvf	Weighted-mean ICVF in tract posterior thalamic radiation (left)	LH	-0.399584	9.85058e-103	0.795787	NA	8.58545e-06	1.62173	0.105126	5.294e-06	-1.8012e-06	1.89721e-05	0.00101065	43.9551	2.02286e-214	2.29928e-05	0.000965518	0.00105579	1.32983e-99	1	2.73086e-211	42.4705	0	0
weighted_icvf	Weighted-mean ICVF in tract posterior thalamic radiation (left)	MH	0.0221994	0.252131	0.828762	55.0192	-7.82349e-05	-14.9089	3.41559e-46	5.24753e-06	-8.85304e-05	-6.79394e-05	0.00183431	50.8926	7.07482e-252	3.60427e-05	0.00176356	0.00190506	1	4.61105e-43	9.55101e-249	52.5096	0	0
weighted_icvf	Weighted-mean ICVF in tract posterior thalamic radiation (left)	LM	-0.576674	1.10914e-234	0.705237	64.3144	8.82474e-05	13.4733	1.46543e-38	6.54981e-06	7.53967e-05	0.000101098	-0.000834071	-36.9514	2.14855e-175	2.25721e-05	-0.000878379	-0.000789764	1.49734e-231	1.97834e-35	2.90054e-172	-39.2423	0	0
weighted_icvf	Weighted-mean ICVF in tract posterior thalamic radiation (right)	LH	0.0875222	6.04587e-06	0.780513	55.0027	0.000146221	27.3309	5.89612e-128	5.35003e-06	0.000135724	0.000156718	0.00103683	47.2642	1.80582e-232	2.19369e-05	0.00099377	0.00107989	0.00816193	7.95977e-125	2.43786e-229	39.4427	0	0
weighted_icvf	Weighted-mean ICVF in tract posterior thalamic radiation (right)	MH	0.171352	5.37271e-19	0.897068	55.0137	-0.000142452	-22.1125	5.79573e-91	6.44213e-06	-0.000155091	-0.000129813	0.00205426	68.4771	0	2.99992e-05	0.00199537	0.00211315	7.25316e-16	7.82423e-88	0	71.5935	0	0
weighted_icvf	Weighted-mean ICVF in tract posterior thalamic radiation (right)	LM	-0.328438	1.15667e-67	0.810574	68.1588	0.000290576	36.44	1.02876e-194	7.97409e-06	0.000274931	0.000306221	-0.00102801	-51.1906	4.58924e-255	2.0082e-05	-0.00106743	-0.000988592	1.56151e-64	1.38882e-191	6.19547e-252	-61.0252	0	0
weighted_icvf	Weighted-mean ICVF in tract superior longitudinal fasciculus (left)	LH	-0.171809	4.19451e-19	0.774863	62.6394	-0.000230567	-49.019	1.97176e-287	4.70364e-06	-0.000239796	-0.000221339	0.00103919	41.3371	9.93713e-200	2.51393e-05	0.000989838	0.00108853	5.66259e-16	2.66188e-284	1.34151e-196	49.6471	0	0
weighted_icvf	Weighted-mean ICVF in tract superior longitudinal fasciculus (left)	MH	-0.203657	2.50904e-26	0.846076	64.3841	-0.00045993	-66.8783	0	6.87713e-06	-0.000473423	-0.000446438	0.00118314	58.4102	2.70791e-289	2.02558e-05	0.00114338	0.0012229	3.3872e-23	0	3.65567e-286	76.8101	0	0
weighted_icvf	Weighted-mean ICVF in tract superior longitudinal fasciculus (left)	LM	0.271384	6.05728e-46	0.359691	NA	0.000230492	38.9299	4.26162e-213	5.9207e-06	0.000218876	0.000242109	-0.00015099	-7.42496	2.88214e-13	2.03355e-05	-0.000190907	-0.000111073	8.17732e-43	5.75319e-210	3.89089e-10	-18.0116	0	0
weighted_icvf	Weighted-mean ICVF in tract superior longitudinal fasciculus (right)	LH	-0.116956	1.39865e-09	0.815712	61.9869	-0.000163323	-39.1439	7.72653e-216	4.17237e-06	-0.000171509	-0.000155137	0.00097925	45.9465	2.36115e-225	2.13128e-05	0.000937414	0.00102109	1.88817e-06	1.04308e-212	3.18755e-222	52.611	0	0
weighted_icvf	Weighted-mean ICVF in tract superior longitudinal fasciculus (right)	MH	-0.129072	2.30088e-11	0.842298	64.0704	-0.000411251	-65.2369	0	6.30396e-06	-0.000423619	-0.000398883	0.00124516	63.407	1.4780389967e-312	1.96376e-05	0.00120661	0.00128371	3.10619e-08	0	0	80.3123	0	0
weighted_icvf	Weighted-mean ICVF in tract superior longitudinal fasciculus (right)	LM	0.173868	2.00108e-19	0.397201	NA	0.000248432	44.3026	3.59536e-252	5.60761e-06	0.00023743	0.000259434	-0.000271555	-11.9367	2.37293e-30	2.27495e-05	-0.00031621	-0.000226899	2.70146e-16	4.85373e-249	3.20346e-27	-22.1928	0	0
weighted_icvf	Weighted-mean ICVF in tract superior thalamic radiation (left)	LH	0.282287	5.21602e-50	0.888463	56.4286	-3.75462e-05	-10.5469	6.40135e-25	3.55994e-06	-4.45307e-05	-3.05618e-05	0.00174951	55.7296	6.01823e-276	3.13928e-05	0.00168788	0.00181113	7.04163e-47	8.64183e-22	8.12462e-273	56.5631	0	0
weighted_icvf	Weighted-mean ICVF in tract superior thalamic radiation (left)	MH	-0.0993355	2.79996e-07	0.866313	NA	-0.000219925	-43.8705	2.3368e-250	5.01304e-06	-0.00022976	-0.000210089	0.00159413	59.4876	2.04839e-294	2.67976e-05	0.00154152	0.00164673	0.000377995	3.15468e-247	2.76532e-291	66.5402	0	0
weighted_icvf	Weighted-mean ICVF in tract superior thalamic radiation (left)	LM	0.719533	0	0.540554	76.7182	0.00018427	33.6514	4.94491e-174	5.47585e-06	0.000173527	0.000195014	0.000142371	8.68054	2.17542e-17	1.64011e-05	0.000110177	0.000174565	0	6.67563e-171	2.93681e-14	-2.42317	0.0153858	1
weighted_icvf	Weighted-mean ICVF in tract superior thalamic radiation (right)	LH	0.217347	7.33882e-30	0.886765	55.5344	-0.000113724	-30.3274	4.96264e-150	3.74988e-06	-0.000121081	-0.000106367	0.00118837	54.3628	3.45893e-269	2.186e-05	0.00114546	0.00123128	9.9074e-27	6.69956e-147	4.66956e-266	58.7077	0	0
weighted_icvf	Weighted-mean ICVF in tract superior thalamic radiation (right)	MH	0.114017	3.62927e-09	0.872202	55.0192	-0.000171424	-42.5022	2.15755e-240	4.03331e-06	-0.000179338	-0.000163511	0.00156312	58.4284	2.21584e-289	2.67528e-05	0.00151061	0.00161564	4.89952e-06	2.91269e-237	2.99138e-286	64.1116	0	0
weighted_icvf	Weighted-mean ICVF in tract superior thalamic radiation (right)	LM	0.0423113	0.0294326	0.339956	NA	5.96372e-05	12.3169	7.34967e-33	4.84191e-06	5.01374e-05	6.91371e-05	-0.000381939	-21.6963	1.65866e-82	1.76039e-05	-0.000416494	-0.000347384	1	9.92206e-30	2.23919e-79	-24.1858	0	0
weighted_icvf	Weighted-mean ICVF in tract uncinate fasciculus (left)	LH	-0.382189	1.97617e-93	0.868909	62.1802	4.40336e-05	6.35779	2.91426e-10	6.92593e-06	3.04452e-05	5.76221e-05	0.00190041	49.5949	7.94676e-245	3.83186e-05	0.00182519	0.00197563	2.66784e-90	3.93425e-07	1.07281e-241	47.6733	0	0
weighted_icvf	Weighted-mean ICVF in tract uncinate fasciculus (left)	MH	-0.478376	2.25119e-152	0.913419	64.4049	-0.000501519	-69.5319	0	7.21279e-06	-0.00051567	-0.000487368	0.0023975	63.3263	3.43173461158e-312	3.78595e-05	0.00232318	0.00247182	3.03911e-149	0	0	75.2202	0	0
weighted_icvf	Weighted-mean ICVF in tract uncinate fasciculus (left)	LM	0.34482	7.80184e-75	0.763103	NA	0.000549531	63.2653	0	8.68613e-06	0.000532489	0.000566573	-0.000510587	-30.7702	5.82299e-138	1.65935e-05	-0.000543159	-0.000478015	1.05325e-71	0	7.86103e-135	-56.6015	0	0
weighted_icvf	Weighted-mean ICVF in tract uncinate fasciculus (right)	LH	-0.776261	0	0.821693	62.1793	5.79156e-05	11.0598	3.95335e-27	5.23659e-06	4.76416e-05	6.81896e-05	0.000196235	12.1288	3.61538e-31	1.61793e-05	0.000164476	0.000227995	0	5.33702e-24	4.88077e-28	8.13374	4.44089e-16	5.9952e-13
weighted_icvf	Weighted-mean ICVF in tract uncinate fasciculus (right)	MH	-0.607396	2.56194e-268	0.856841	65.4672	-0.000392071	-69.7628	0	5.62005e-06	-0.000403097	-0.000381044	0.000813417	43.7788	1.13897e-213	1.85802e-05	0.000776945	0.00084989	3.45862e-265	0	1.53761e-210	62.1017	0	0
weighted_icvf	Weighted-mean ICVF in tract uncinate fasciculus (right)	LM	-0.105779	4.84161e-08	0.803951	64.7738	0.000454616	62.9551	0	7.22128e-06	0.000440448	0.000468784	-0.00061953	-42.4814	1.78913e-207	1.45836e-05	-0.000648156	-0.000590904	6.53618e-05	0	2.41532e-204	-66.0058	0	0
weighted_od	Weighted-mean OD in tract acoustic radiation (left)	LH	0.821441	0	0.824414	67.0452	-8.75272e-05	-11.839	1.20799e-30	7.39311e-06	-0.000102032	-7.30222e-05	0.000669301	19.8992	9.82705e-72	3.36345e-05	0.000603277	0.000735325	0	1.63079e-27	1.32665e-68	21.9769	0	0
weighted_od	Weighted-mean OD in tract acoustic radiation (left)	MH	0.444988	1.0814e-129	0.666698	67.8861	-0.000190046	-22.5881	3.24286e-94	8.41355e-06	-0.000206553	-0.000173539	0.000970512	25.0729	1.37741e-102	3.87076e-05	0.00089453	0.00104649	1.45989e-126	4.37786e-91	1.8595e-99	29.2986	0	0
weighted_od	Weighted-mean OD in tract acoustic radiation (left)	LM	0.57748	1.74787e-235	0.553077	65.8618	0.000101549	12.3115	7.79957e-33	8.24834e-06	8.53659e-05	0.000117732	-0.000298676	-20.9666	3.49772e-78	1.42453e-05	-0.000326638	-0.000270713	2.35963e-232	1.05294e-29	4.72193e-75	-24.3135	0	0
weighted_od	Weighted-mean OD in tract acoustic radiation (right)	LH	0.709708	0	0.750384	62.1363	0.000223637	21.9849	3.95025e-90	1.01723e-05	0.00020368	0.000243595	-0.000459392	-26.9138	9.67013e-114	1.7069e-05	-0.000492898	-0.000425886	0	5.33284e-87	1.30547e-110	-34.3745	0	0
weighted_od	Weighted-mean OD in tract acoustic radiation (right)	MH	0.864806	0	0.708843	62.3579	0.000186811	16.4938	3.60268e-55	1.13261e-05	0.00016459	0.000209033	0.000130519	7.83268	1.53432e-14	1.66633e-05	9.78092e-05	0.000163228	0	4.86362e-52	2.07133e-11	-2.79393	0.00520718	1
weighted_od	Weighted-mean OD in tract acoustic radiation (right)	LM	0.147454	2.396e-14	0.417882	62.1141	3.82683e-05	4.75015	2.28539e-06	8.05624e-06	2.2462e-05	5.40747e-05	-0.000588754	-33.9185	3.53895e-157	1.73579e-05	-0.000622826	-0.000554682	3.2346e-11	0.00308527	4.77758e-154	-32.766	0	0
weighted_od	Weighted-mean OD in tract anterior thalamic radiation (left)	LH	0.136676	1.38354e-12	0.158834	NA	0.000149683	26.8212	3.01306e-124	5.58078e-06	0.000138734	0.000160633	0.000102417	3.68178	0.000247365	2.78173e-05	4.78125e-05	0.000157021	1.86778e-09	4.06763e-121	0.333943	-1.66597	0.0957184	1
weighted_od	Weighted-mean OD in tract anterior thalamic radiation (left)	MH	-0.459316	4.06396e-139	0.485859	69.1873	3.66281e-06	0.764764	0.444565	4.78946e-06	-5.73398e-06	1.30596e-05	0.00082015	23.633	7.25417e-94	3.47037e-05	0.000752028	0.000888273	5.48635e-136	1	9.79313e-91	23.3065	0	0
weighted_od	Weighted-mean OD in tract anterior thalamic radiation (left)	LM	0.526629	5.87317e-189	0.782657	NA	0.000147411	23.3927	1.54265e-99	6.30158e-06	0.000135047	0.000159774	-0.000719432	-54.5594	2.47749e-272	1.31862e-05	-0.000745315	-0.000693548	7.92878e-186	2.08258e-96	3.34461e-269	-59.3135	0	0
weighted_od	Weighted-mean OD in tract anterior thalamic radiation (right)	LH	0.581303	9.38435e-241	0.455827	72.306	6.90268e-05	13.597	3.08768e-39	5.07663e-06	5.90666e-05	7.89869e-05	0.000307019	15.8908	1.50972e-49	1.93205e-05	0.000269093	0.000344944	1.26689e-237	4.16836e-36	2.03813e-46	11.9137	0	0
weighted_od	Weighted-mean OD in tract anterior thalamic radiation (right)	MH	-0.0869394	7.02771e-06	0.482212	64.3117	-7.54161e-05	-9.79216	7.99563e-22	7.70169e-06	-9.05266e-05	-6.03056e-05	0.000827532	34.5224	4.45521e-160	2.39708e-05	0.000780478	0.000874586	0.00948741	1.07941e-18	6.01453e-157	35.863	0	0
weighted_od	Weighted-mean OD in tract anterior thalamic radiation (right)	LM	0.352664	2.00459e-78	0.348395	NA	0.000143572	15.0187	9.66515e-47	9.55957e-06	0.000124816	0.000162328	-0.000517404	-38.2535	4.21885e-183	1.35257e-05	-0.000543954	-0.000490854	2.70619e-75	1.30479e-43	5.69545e-180	-39.9071	0	0
weighted_od	Weighted-mean OD in tract cingulate gyrus part of cingulum (left)	LH	0.293184	5.59359e-54	0.148385	NA	0.000329203	22.0972	6.80742e-91	1.4898e-05	0.000299974	0.000358432	-1.42405e-05	-0.376406	0.706716	3.78329e-05	-8.85055e-05	6.00244e-05	7.55134e-51	9.19002e-88	1	-8.4466	0	0
weighted_od	Weighted-mean OD in tract cingulate gyrus part of cingulum (left)	MH	-0.299472	2.61072e-56	0.631563	65.9741	0.000252549	16.4338	8.07944e-55	1.53677e-05	0.000222398	0.000282701	0.00166849	42.9712	3.67925e-209	3.88281e-05	0.00159227	0.00174471	3.52447e-53	1.09072e-51	4.96698e-206	33.9077	0	0
weighted_od	Weighted-mean OD in tract cingulate gyrus part of cingulum (left)	LM	0.496965	2.82728e-165	0.710644	66.3938	7.89176e-05	7.20021	1.07512e-12	1.09604e-05	5.74132e-05	0.000100422	-0.00164934	-45.0619	4.49353e-222	3.66017e-05	-0.00172119	-0.00157749	3.81683e-162	1.45142e-09	6.06627e-219	-45.2335	0	0
weighted_od	Weighted-mean OD in tract cingulate gyrus part of cingulum (right)	LH	0.162107	3.75322e-17	0.229636	65.7379	0.000276748	11.3763	1.5559e-28	2.43267e-05	0.00022902	0.000324476	-0.00137	-19.2614	4.5008e-68	7.11267e-05	-0.00150962	-0.00123038	5.06685e-14	2.10047e-25	6.07608e-65	-21.9065	0	0
weighted_od	Weighted-mean OD in tract cingulate gyrus part of cingulum (right)	MH	-0.926713	0	0.916862	67.9801	-0.000158331	-11.2292	7.11186e-28	1.40999e-05	-0.000185995	-0.000130667	-0.00102248	-28.7241	6.8615e-125	3.55968e-05	-0.00109236	-0.000952609	0	9.60101e-25	9.26303e-122	-22.5701	0	0
weighted_od	Weighted-mean OD in tract cingulate gyrus part of cingulum (right)	LM	0.858126	0	0.713813	67.6485	0.000438115	24.8466	9.88566e-110	1.76328e-05	0.000403519	0.00047271	-0.000325511	-3.98022	7.50858e-05	8.17821e-05	-0.000486043	-0.000164979	0	1.33456e-106	0.101366	-9.12758	0	0
weighted_od	Weighted-mean OD in tract parahippocampal part of cingulum (left)	LH	-0.518414	2.98542e-183	0.760099	62.2276	-0.000393031	-46.0064	5.1605e-266	8.54296e-06	-0.000409792	-0.00037627	0.000960379	40.0618	1.90669e-192	2.39724e-05	0.000913322	0.00100744	4.03032e-180	6.96668e-263	2.57404e-189	53.1809	0	0
weighted_od	Weighted-mean OD in tract parahippocampal part of cingulum (left)	MH	-0.74282	0	0.712085	NA	-0.00027982	-27.1474	1.49049e-126	1.03074e-05	-0.000300043	-0.000259597	0.000277293	10.8961	7.39689e-26	2.54488e-05	0.000227338	0.000327248	0	2.01216e-123	9.98581e-23	20.2904	0	0
weighted_od	Weighted-mean OD in tract parahippocampal part of cingulum (left)	LM	0.000570235	0.976597	0.427846	77.2985	-0.0001094	-12.1085	7.11838e-32	9.03492e-06	-0.000127126	-9.16732e-05	0.000670445	29.3162	5.64705e-129	2.28694e-05	0.000625554	0.000715336	1	9.60981e-29	7.62352e-126	31.7146	0	0
weighted_od	Weighted-mean OD in tract parahippocampal part of cingulum (right)	LH	-0.196635	1.22764e-24	0.512426	57.6115	-0.000353731	-45.1113	1.43226e-259	7.84131e-06	-0.000369116	-0.000338347	0.000456444	18.6161	2.05845e-64	2.45188e-05	0.000408314	0.000504574	1.65731e-21	1.93355e-256	2.7789e-61	31.4727	0	0
weighted_od	Weighted-mean OD in tract parahippocampal part of cingulum (right)	MH	-0.759298	0	0.60788	68.6563	-2.50585e-05	-2.46618	0.0137971	1.01608e-05	-4.49937e-05	-5.12322e-06	-3.9489e-05	-1.29709	0.194977	3.04442e-05	-9.925e-05	2.0272e-05	0	1	1	-0.449618	0.652986	1
weighted_od	Weighted-mean OD in tract parahippocampal part of cingulum (right)	LM	0.498668	1.42618e-166	0.680019	72.8254	-0.000326458	-32.0109	7.22937e-162	1.01984e-05	-0.000346468	-0.000306449	0.000487935	18.1048	1.09642e-61	2.69506e-05	0.000435033	0.000540837	1.92534e-163	9.75965e-159	1.48017e-58	28.2622	0	0
weighted_od	Weighted-mean OD in tract corticospinal tract (left)	LH	0.798657	0	0.724926	67.6412	-8.63728e-06	-0.702696	0.482383	1.22916e-05	-3.2753e-05	1.54785e-05	0.00130556	26.977	3.97777e-114	4.83954e-05	0.00121056	0.00140056	0	1	5.36998e-111	26.3198	0	0
weighted_od	Weighted-mean OD in tract corticospinal tract (left)	MH	-0.146761	2.71595e-14	0.589733	NA	0.000216497	23.0202	3.41137e-97	9.40464e-06	0.000198045	0.000234948	0.0019204	30.6681	9.15958e-137	6.26189e-05	0.00179748	0.00204332	3.66653e-11	4.60535e-94	1.23654e-133	26.909	0	0
weighted_od	Weighted-mean OD in tract corticospinal tract (left)	LM	0.738337	0	0.843243	68.8359	-0.000228038	-19.632	2.29504e-74	1.16156e-05	-0.000250828	-0.000205248	-0.000620593	-27.248	2.78867e-116	2.27757e-05	-0.0006653	-0.000575886	0	3.09831e-71	3.76471e-113	-15.3541	0	0
weighted_od	Weighted-mean OD in tract corticospinal tract (right)	LH	0.706297	0	0.710379	69.3088	2.58916e-05	1.99233	0.046564	1.29956e-05	3.94573e-07	5.13886e-05	0.00168547	37.8027	2.37366e-179	4.4586e-05	0.00159795	0.00177299	0	1	3.20445e-176	35.735	0	0
weighted_od	Weighted-mean OD in tract corticospinal tract (right)	MH	-0.22277	2.6725e-31	0.469625	67.2564	-3.39325e-05	-3.11236	0.00190049	1.09025e-05	-5.5323e-05	-1.25421e-05	0.00169299	31.1883	6.21786e-140	5.42829e-05	0.00158644	0.00179955	3.60787e-28	1	8.39412e-137	31.1906	0	0
weighted_od	Weighted-mean OD in tract corticospinal tract (right)	LM	0.867264	0	0.814749	68.4006	5.80583e-05	6.28743	4.55374e-10	9.23403e-06	3.99411e-05	7.61754e-05	-1.74051e-05	-0.871412	0.383789	1.99734e-05	-5.66113e-05	2.18012e-05	0	6.14755e-07	1	-3.42943	0.00060485	0.816548
weighted_od	Weighted-mean OD in tract forceps major	LH	0.481149	1.72961e-154	0.859916	64.5053	0.00065996	53.1615	3.7191168e-316	1.24142e-05	0.000635604	0.000684316	-0.00167395	-68.9129	0	2.42908e-05	-0.00172163	-0.00162627	2.33498e-151	5.0208076758e-313	0	-85.5563	0	0
weighted_od	Weighted-mean OD in tract forceps major	MH	0.594036	8.53553e-254	0.63793	67.7413	0.000382744	50.7349	3.95206e-299	7.544e-06	0.000367943	0.000397545	-0.000554727	-17.723	1.89021e-59	3.12999e-05	-0.000616167	-0.000493286	1.1523e-250	5.33528e-296	2.55178e-56	-29.1174	0	0
weighted_od	Weighted-mean OD in tract forceps major	LM	0.303844	1.01918e-57	0.66994	61.9409	0.000279751	23.4774	3.85983e-100	1.19158e-05	0.000256372	0.000303129	-0.00110159	-33.9297	3.0276e-157	3.2467e-05	-0.00116532	-0.00103786	1.3759e-54	5.21077e-97	4.08726e-154	-39.9411	0	0
weighted_od	Weighted-mean OD in tract forceps minor	LH	0.235159	8.29813e-35	0.233144	69.1732	-0.000101032	-13.2776	1.30521e-37	7.60915e-06	-0.00011596	-8.61027e-05	-0.000365348	-17.5982	9.69403e-59	2.07605e-05	-0.0004061	-0.000324596	1.12025e-31	1.76203e-34	1.30869e-55	-11.9541	0	0
weighted_od	Weighted-mean OD in tract forceps minor	MH	-0.575176	2.03222e-234	0.720529	64.6271	-0.000451695	-53.4006	1.898872e-317	8.45861e-06	-0.00046829	-0.000435099	0.000420695	19.6715	1.87695e-70	2.1386e-05	0.000378715	0.000462675	2.7435e-231	2.56347739e-314	2.53389e-67	37.9333	0	0
weighted_od	Weighted-mean OD in tract forceps minor	LM	0.649462	3.068938e-317	0.826808	66.2003	0.000354256	45.2272	8.72853e-259	7.83281e-06	0.000338888	0.000369624	-0.00076464	-46.3177	5.33164e-229	1.65086e-05	-0.000797045	-0.000732235	4.1430665237e-314	1.17835e-255	7.19771e-226	-61.2337	0	0
weighted_od	Weighted-mean OD in tract inferior fronto-occipital fasciculus (left)	LH	0.451776	3.35622e-134	0.655845	67.5047	-0.000110096	-12.0242	1.65775e-31	9.15623e-06	-0.00012806	-9.2132e-05	-0.000774372	-40.8892	3.51173e-197	1.89383e-05	-0.000811547	-0.000737197	4.5309e-131	2.23796e-28	4.74083e-194	-31.5787	0	0
weighted_od	Weighted-mean OD in tract inferior fronto-occipital fasciculus (left)	MH	-0.604362	5.85675e-265	0.353099	67.9585	-0.000286033	-42.6314	2.4545e-241	6.70944e-06	-0.000299196	-0.000272869	-7.2212e-06	-0.269262	0.787798	2.68185e-05	-5.98649e-05	4.54225e-05	7.90662e-262	3.31358e-238	1	10.0854	0	0
weighted_od	Weighted-mean OD in tract inferior fronto-occipital fasciculus (left)	LM	0.685578	0	0.67397	67.5302	0.000174553	25.6236	3.13401e-115	6.8122e-06	0.000161187	0.000187919	-0.000754171	-20.757	5.99395e-77	3.63333e-05	-0.000825491	-0.000682852	0	4.23091e-112	8.09184e-74	-25.1235	0	0
weighted_od	Weighted-mean OD in tract inferior fronto-occipital fasciculus (right)	LH	-0.175117	8.51708e-20	0.144479	59.1597	-0.000124041	-15.3702	9.36729e-49	8.07022e-06	-0.000139874	-0.000108207	-5.52331e-05	-4.12254	4.14349e-05	1.33978e-05	-8.15327e-05	-2.89336e-05	1.14981e-16	1.26458e-45	0.0559371	4.39929	1.08608e-05	0.014662
weighted_od	Weighted-mean OD in tract inferior fronto-occipital fasciculus (right)	MH	0.0616499	0.00145792	0.121887	NA	0.000157218	29.9585	3.31131e-147	5.24784e-06	0.000146922	0.000167514	8.47613e-05	4.60694	4.76039e-06	1.83986e-05	4.86455e-05	0.000120877	1	4.47026e-144	0.00642652	-3.7871	0.000152413	0.205757
weighted_od	Weighted-mean OD in tract inferior fronto-occipital fasciculus (right)	LM	-0.217223	1.16864e-29	0.313559	61.0019	-0.000283008	-35.8861	1.30532e-190	7.88628e-06	-0.000298481	-0.000267535	-0.00013332	-9.68177	4.82644e-21	1.37702e-05	-0.00016035	-0.00010629	1.57766e-26	1.76219e-187	6.5157e-18	9.43295	0	0
weighted_od	Weighted-mean OD in tract inferior longitudinal fasciculus (left)	LH	0.817635	0	0.573587	67.1896	0.000119029	28.2414	1.27894e-134	4.21469e-06	0.00011076	0.000127298	0.000241909	12.9332	7.64785e-35	1.87044e-05	0.000205193	0.000278625	0	1.72657e-131	1.03246e-31	6.40888	1.46595e-10	1.97903e-07
weighted_od	Weighted-mean OD in tract inferior longitudinal fasciculus (left)	MH	-0.295919	5.79855e-55	0.539125	65.3272	0.000188291	46.161	7.17271e-267	4.079e-06	0.000180288	0.000196294	0.000343842	22.3943	1.95971e-86	1.5354e-05	0.000313703	0.000373981	7.82804e-52	9.68316e-264	2.64561e-83	9.79138	0	0
weighted_od	Weighted-mean OD in tract inferior longitudinal fasciculus (left)	LM	0.676978	0	0.639624	66.0311	-6.6356e-05	-14.8709	6.22218e-46	4.46215e-06	-7.51107e-05	-5.76012e-05	-9.58761e-05	-3.72767	0.000206819	2.57201e-05	-0.000146363	-4.53895e-05	0	8.39994e-43	0.279205	-1.13085	0.258118	1
weighted_od	Weighted-mean OD in tract inferior longitudinal fasciculus (right)	LH	-0.163307	2.1838e-17	0.218628	61.3576	-3.39654e-05	-7.22493	8.94886e-13	4.70113e-06	-4.31889e-05	-2.47419e-05	0.000189764	11.4496	3.43437e-28	1.65738e-05	0.00015723	0.000222298	2.94814e-14	1.2081e-09	4.6364e-25	12.9866	0	0
weighted_od	Weighted-mean OD in tract inferior longitudinal fasciculus (right)	MH	-0.347555	1.81807e-76	0.619508	64.4083	0.00010143	15.5669	7.55202e-50	6.51573e-06	8.86461e-05	0.000114213	0.000498739	35.7953	1.13068e-167	1.39331e-05	0.000471388	0.000526089	2.45439e-73	1.01952e-46	1.52642e-164	25.8306	0	0
weighted_od	Weighted-mean OD in tract inferior longitudinal fasciculus (right)	LM	0.26058	2.26346e-42	0.418281	66.1036	-0.000134911	-28.8169	2.49776e-138	4.68166e-06	-0.000144096	-0.000125726	-0.000301979	-17.573	9.97093e-59	1.71843e-05	-0.00033571	-0.000268247	3.05567e-39	3.37198e-135	1.34608e-55	-9.38024	0	0
weighted_od	Weighted-mean OD in tract middle cerebellar peduncle	LH	0.512142	3.71238e-178	0.616903	NA	0.000294032	32.0824	4.20853e-163	9.16491e-06	0.000276051	0.000312013	-0.000662056	-26.7927	5.30642e-113	2.47103e-05	-0.000710561	-0.00061355	5.01172e-175	5.68152e-160	7.16367e-110	-36.2771	0	0
weighted_od	Weighted-mean OD in tract middle cerebellar peduncle	MH	-0.493801	9.80836e-164	0.572664	62.8153	0.000211675	22.2239	9.82418e-92	9.52468e-06	0.000192988	0.000230363	-0.00059329	-19.1222	2.62452e-67	3.10263e-05	-0.000654194	-0.000532387	1.32413e-160	1.32626e-88	3.5431e-64	-24.8022	0	0
weighted_od	Weighted-mean OD in tract middle cerebellar peduncle	LM	0.786068	0	0.662583	63.2989	8.03539e-05	8.40691	1.21356e-16	9.55807e-06	6.16009e-05	9.91068e-05	-6.96435e-05	-2.26359	0.0238656	3.07669e-05	-0.000130036	-9.25051e-06	0	1.6383e-13	1	-4.6558	3.22731e-06	0.00435687
weighted_od	Weighted-mean OD in tract medial lemniscus (left)	LH	0.712179	0	0.841105	67.9071	-0.000181438	-19.9674	1.06462e-76	9.08667e-06	-0.000199265	-0.00016361	0.000712461	42.0707	6.99329e-204	1.69348e-05	0.000679218	0.000745703	0	1.43723e-73	9.44094e-201	46.512	0	0
weighted_od	Weighted-mean OD in tract medial lemniscus (left)	MH	-0.0487045	0.0119481	0.51302	61.3429	-0.000494588	-31.7336	2.13229e-160	1.55856e-05	-0.000525166	-0.000464009	0.000651209	26.4073	1.01253e-110	2.46602e-05	0.000602802	0.000699616	1	2.87859e-157	1.36692e-107	39.2766	0	0
weighted_od	Weighted-mean OD in tract medial lemniscus (left)	LM	0.831306	0	0.68107	65.4992	0.000320483	28.689	2.15568e-137	1.1171e-05	0.000298566	0.0003424	6.32497e-05	3.29707	0.00101999	1.91836e-05	2.55937e-05	0.000100906	0	2.91017e-134	1	-11.5875	0	0
weighted_od	Weighted-mean OD in tract medial lemniscus (right)	LH	-0.400939	1.7596e-103	0.787888	NA	-0.000184003	-15.6927	1.43324e-50	1.17254e-05	-0.000207008	-0.000160998	0.00121089	52.6353	1.67593e-260	2.30053e-05	0.00116573	0.00125605	2.37546e-100	1.93487e-47	2.2625e-257	54.0215	0	0
weighted_od	Weighted-mean OD in tract medial lemniscus (right)	MH	-0.345137	2.30327e-75	0.831421	NA	-0.000711893	-49.5366	8.91606e-291	1.4371e-05	-0.000740088	-0.000683697	0.00184444	55.1447	2.08417e-273	3.34472e-05	0.00177878	0.00191009	3.10941e-72	1.20367e-287	2.81362e-270	70.2214	0	0
weighted_od	Weighted-mean OD in tract medial lemniscus (right)	LM	0.119943	5.91371e-10	0.62663	63.0329	0.000531914	45.3227	1.81864e-259	1.17362e-05	0.000508888	0.00055494	-0.000633329	-28.4211	1.8283e-123	2.22838e-05	-0.00067707	-0.000589587	7.9835e-07	2.45516e-256	2.4682e-120	-46.2666	0	0
weighted_od	Weighted-mean OD in tract posterior thalamic radiation (left)	LH	-0.326534	2.9914e-67	0.769765	64.0885	-0.000157037	-24.0918	1.02857e-104	6.51829e-06	-0.000169826	-0.000144249	0.000925232	47.3442	6.72531e-233	1.95427e-05	0.00088687	0.000963594	4.03839e-64	1.38857e-101	9.07917e-230	52.5346	0	0
weighted_od	Weighted-mean OD in tract posterior thalamic radiation (left)	MH	-0.118455	8.7053e-10	0.551267	66.315	-1.52024e-05	-2.77129	0.00567104	5.48568e-06	-2.59651e-05	-4.43964e-06	0.00127637	30.9886	1.02262e-138	4.11885e-05	0.00119552	0.00135722	1.17522e-06	1	1.38054e-135	31.0832	0	0
weighted_od	Weighted-mean OD in tract posterior thalamic radiation (left)	LM	-0.414875	1.00219e-110	0.208788	59.4544	-0.000143848	-17.9418	9.39149e-64	8.01747e-06	-0.000159578	-0.000128118	-0.000354812	-11.221	3.03198e-27	3.16203e-05	-0.00041688	-0.000292744	1.35295e-107	1.26785e-60	4.09317e-24	-6.46713	9.98814e-11	1.3484e-07
weighted_od	Weighted-mean OD in tract posterior thalamic radiation (right)	LH	-0.123054	1.84441e-10	0.178604	59.835	-3.78939e-05	-4.47138	8.5167e-06	8.47476e-06	-5.45211e-05	-2.12667e-05	0.000152801	10.0544	1.84002e-22	1.51974e-05	0.000122969	0.000182633	2.48995e-07	0.0114975	2.48403e-19	10.9591	0	0
weighted_od	Weighted-mean OD in tract posterior thalamic radiation (right)	MH	0.648391	1.6172942e-317	0.531618	61.9705	0.000186443	22.2422	7.57525e-92	8.38241e-06	0.000169997	0.000202889	0.000584875	26.3998	1.12555e-110	2.21545e-05	0.000541386	0.000628363	2.1833472344e-314	1.02266e-88	1.5195e-107	16.8205	0	0
weighted_od	Weighted-mean OD in tract posterior thalamic radiation (right)	LM	-0.533128	1.81681e-194	0.35214	60.9777	-0.000230251	-17.3414	4.12342e-60	1.32775e-05	-0.000256302	-0.000204201	-0.000422875	-14.1465	9.92937e-41	2.98926e-05	-0.000481552	-0.000364198	2.45269e-191	5.56661e-57	1.34046e-37	-5.88907	3.88375e-09	5.24306e-06
weighted_od	Weighted-mean OD in tract superior longitudinal fasciculus (left)	LH	0.796935	0	0.757085	64.7177	8.28839e-05	11.0607	3.91742e-27	7.49355e-06	6.81818e-05	9.7586e-05	-2.40464e-06	-0.157312	0.875039	1.52858e-05	-3.24102e-05	2.76009e-05	0	5.28851e-24	1	-5.00997	5.44383e-07	0.000734918
weighted_od	Weighted-mean OD in tract superior longitudinal fasciculus (left)	MH	0.536045	5.20563e-198	0.565226	58.6879	0.000334574	67.5312	0	4.95436e-06	0.000324854	0.000344294	0.000119242	6.81086	1.91886e-11	1.75077e-05	8.48754e-05	0.000153609	7.02761e-195	0	2.59046e-08	-11.8345	0	0
weighted_od	Weighted-mean OD in tract superior longitudinal fasciculus (left)	LM	0.560452	5.33511e-219	0.725757	68.86	-0.000252422	-32.9124	1.50227e-168	7.6695e-06	-0.000267469	-0.000237374	-0.000124322	-10.7622	2.51696e-25	1.15518e-05	-0.000146998	-0.000101647	7.2024e-216	2.02806e-165	3.39789e-22	9.2384	0	0
weighted_od	Weighted-mean OD in tract superior longitudinal fasciculus (right)	LH	0.889222	0	0.844127	68.1977	6.86595e-05	11.0622	3.85671e-27	6.20666e-06	5.64823e-05	8.08368e-05	0.000970081	44.2972	2.58556e-216	2.18994e-05	0.000927093	0.00101307	0	5.20656e-24	3.49051e-213	39.6022	0	0
weighted_od	Weighted-mean OD in tract superior longitudinal fasciculus (right)	MH	-0.046522	0.0163545	0.371941	62.067	3.02996e-05	6.43967	1.73724e-10	4.70515e-06	2.10682e-05	3.9531e-05	0.000492605	23.3239	5.27046e-92	2.11202e-05	0.000451147	0.000534063	1	2.34527e-07	7.11513e-89	21.3655	0	0
weighted_od	Weighted-mean OD in tract superior longitudinal fasciculus (right)	LM	0.909143	0	0.88954	66.5872	4.20191e-05	6.38853	2.41517e-10	6.57726e-06	2.91145e-05	5.49236e-05	0.000468799	39.5189	1.61625e-190	1.18627e-05	0.000445513	0.000492084	0	3.26048e-07	2.18193e-187	31.4641	0	0
weighted_od	Weighted-mean OD in tract superior thalamic radiation (left)	LH	0.901025	0	0.925978	58.9419	5.80018e-05	11.0113	6.4508e-27	5.2675e-06	4.76671e-05	6.83364e-05	0.00229724	55.337	5.14116e-274	4.15135e-05	0.00221575	0.00237873	0	8.70858e-24	6.94057e-271	53.5108	0	0
weighted_od	Weighted-mean OD in tract superior thalamic radiation (left)	MH	0.73361	0	0.881444	55.6226	0.000231789	41.7393	8.31458e-235	5.55327e-06	0.000220894	0.000242685	0.00222361	55.2237	8.48089e-274	4.02655e-05	0.00214457	0.00230265	0	1.12247e-231	1.14492e-270	49.0033	0	0
weighted_od	Weighted-mean OD in tract superior thalamic radiation (left)	LM	0.741099	0	0.704756	70.5284	-0.000175529	-24.1468	8.62182e-105	7.26925e-06	-0.000189791	-0.000161266	6.42352e-05	4.41526	1.14692e-05	1.45485e-05	3.56777e-05	9.27928e-05	0	1.16395e-101	0.0154834	14.7425	0	0
weighted_od	Weighted-mean OD in tract superior thalamic radiation (right)	LH	0.79438	0	0.893607	59.3769	0.000361141	48.4111	3.81982e-283	7.45987e-06	0.000346505	0.000375777	0.00283907	56.5735	4.51815e-280	5.01837e-05	0.00274056	0.00293758	0	5.15676e-280	6.0995e-277	48.8405	0	0
weighted_od	Weighted-mean OD in tract superior thalamic radiation (right)	MH	0.762416	0	0.884336	56.4915	0.000266049	44.227	6.07924e-253	6.01553e-06	0.000254247	0.000277851	0.00271646	59.6352	4.1161e-295	4.55513e-05	0.00262705	0.00280588	0	8.20698e-250	5.55673e-292	53.3315	0	0
weighted_od	Weighted-mean OD in tract superior thalamic radiation (right)	LM	0.418759	5.55241e-113	0.262807	79.1119	9.53657e-05	15.4734	2.91084e-49	6.16319e-06	8.32735e-05	0.000107458	0.000101179	6.22816	7.60598e-10	1.62454e-05	6.92903e-05	0.000133067	7.49575e-110	3.92964e-46	1.02681e-06	0.334557	0.737959	1
weighted_od	Weighted-mean OD in tract uncinate fasciculus (left)	LH	0.529974	6.33709e-193	0.626154	71.266	-1.17272e-05	-1.06337	0.28783	1.10283e-05	-3.33644e-05	9.91e-06	0.000775635	47.5391	6.0848e-234	1.63157e-05	0.000743608	0.000807662	8.55507e-190	1	8.21448e-231	39.9812	0	0
weighted_od	Weighted-mean OD in tract uncinate fasciculus (left)	MH	0.674577	0	0.5999	65.3979	0.0003167	35.6097	2.37959e-189	8.89364e-06	0.000299251	0.000334149	6.76407e-05	3.53546	0.000430697	1.9132e-05	3.00852e-05	0.000105196	0	3.21245e-186	0.58144	-11.8048	0	0
weighted_od	Weighted-mean OD in tract uncinate fasciculus (left)	LM	-0.076744	7.69008e-05	0.558845	59.5028	-0.000325353	-32.7087	4.86504e-167	9.94697e-06	-0.000344869	-0.000305837	0.000697115	32.7506	5.1052e-150	2.12856e-05	0.000655333	0.000738897	0.103816	6.5678e-164	6.89202e-147	43.5184	0	0
weighted_od	Weighted-mean OD in tract uncinate fasciculus (right)	LH	-0.851484	0	0.712641	60.3183	-0.000266685	-42.5834	3.38242e-241	6.26266e-06	-0.000278972	-0.000254398	-0.000375179	-13.1855	5.01271e-36	2.84539e-05	-0.000431033	-0.000319325	0	4.56626e-238	6.76716e-33	-3.72383	0.000196225	0.264904
weighted_od	Weighted-mean OD in tract uncinate fasciculus (right)	MH	-0.952862	0	0.902669	66.3392	-0.000320983	-33.8631	2.69615e-176	9.47886e-06	-0.00033958	-0.000302386	-0.000466863	-25.2928	6.32598e-104	1.84583e-05	-0.000503097	-0.00043063	0	3.63981e-173	8.54008e-101	-7.03041	2.05924e-12	2.77998e-09
weighted_od	Weighted-mean OD in tract uncinate fasciculus (right)	LM	0.726685	0	0.565327	72.9463	5.97484e-05	7.63257	4.76776e-14	7.82808e-06	4.43897e-05	7.51071e-05	9.50945e-05	3.98336	7.41285e-05	2.3873e-05	4.82337e-05	0.000141955	0	6.43648e-11	0.100074	1.40689	0.15946	1
weighted_isovf	Weighted-mean ISOVF in tract acoustic radiation (left)	LH	0.62236	1.21639e-285	0.85222	63.1692	-0.00153144	-43.092	6.50176e-245	3.55389e-05	-0.00160117	-0.00146172	0.00416074	38.403	7.46052e-183	0.000108344	0.00394806	0.00437341	1.64212e-282	8.77738e-242	1.00717e-179	49.9209	0	0
weighted_isovf	Weighted-mean ISOVF in tract acoustic radiation (left)	MH	0.477751	6.31239e-152	0.902485	68.3401	-0.00299447	-58.867	0	5.08684e-05	-0.00309427	-0.00289467	0.00359646	46.7909	3.50623e-230	7.68624e-05	0.00344558	0.00374734	8.52172e-149	0	4.73341e-227	71.5079	0	0
weighted_isovf	Weighted-mean ISOVF in tract acoustic radiation (left)	LM	0.260461	2.47345e-42	0.468281	56.4079	0.00143487	34.3483	3.32785e-179	4.17741e-05	0.00135291	0.00151683	0.000607993	7.59901	8.32972e-14	8.00095e-05	0.00045094	0.000765046	3.33916e-39	4.4926e-176	1.12451e-10	-9.1612	0	0
weighted_isovf	Weighted-mean ISOVF in tract acoustic radiation (right)	LH	-0.375642	4.50178e-90	0.732946	64.4511	-0.00146134	-44.9561	1.8908e-258	3.25059e-05	-0.00152511	-0.00139756	0.0024249	34.7016	5.19829e-161	6.98785e-05	0.00228773	0.00256207	6.0774e-87	2.55257e-255	7.0177e-158	50.4254	0	0
weighted_isovf	Weighted-mean ISOVF in tract acoustic radiation (right)	MH	-0.367677	4.9947e-86	0.815123	59.7258	-0.0019853	-72.8982	0	2.72338e-05	-0.00203873	-0.00193186	0.00303266	38.9283	4.3762e-186	7.79036e-05	0.00287973	0.00318558	6.74285e-83	0	5.90787e-183	60.804	0	0
weighted_isovf	Weighted-mean ISOVF in tract acoustic radiation (right)	LM	0.134129	4.16462e-12	0.112379	55.0055	0.000509462	17.0964	1.20496e-58	2.97994e-05	0.000450996	0.000567929	-0.000588264	-6.22858	7.5909e-10	9.4446e-05	-0.000773655	-0.000402874	5.62223e-09	1.62669e-55	1.02477e-06	-11.0842	0	0
weighted_isovf	Weighted-mean ISOVF in tract anterior thalamic radiation (left)	LH	-0.656667	0	0.670802	63.3929	-0.00121335	-44.0122	1.29844e-251	2.75684e-05	-0.00126744	-0.00115926	0.000278227	4.81685	1.74842e-06	5.77613e-05	0.000164844	0.000391611	0	1.75289e-248	0.00236036	23.3047	0	0
weighted_isovf	Weighted-mean ISOVF in tract anterior thalamic radiation (left)	MH	-0.670373	0	0.838078	61.4848	-0.00238734	-79.2884	0	3.01096e-05	-0.00244642	-0.00232827	0.00107351	16.7159	5.93579e-54	6.4221e-05	0.00094745	0.00119958	0	0	8.01331e-51	48.7933	0	0
weighted_isovf	Weighted-mean ISOVF in tract anterior thalamic radiation (left)	LM	0.584042	4.23196e-242	0.580984	59.8896	0.0011702	49.5177	5.63236e-289	2.36319e-05	0.00112383	0.00121656	-0.000754502	-10.6746	5.78711e-25	7.0682e-05	-0.000893246	-0.000615759	5.71315e-239	7.60368e-286	7.8126e-22	-25.8252	0	0
weighted_isovf	Weighted-mean ISOVF in tract anterior thalamic radiation (right)	LH	-0.303617	6.02335e-58	0.699402	61.4341	-0.00135079	-57.724	0	2.34008e-05	-0.0013967	-0.00130487	0.00210459	29.5836	4.74935e-130	7.11405e-05	0.00196495	0.00224424	8.13152e-55	0	6.41162e-127	46.1392	0	0
weighted_isovf	Weighted-mean ISOVF in tract anterior thalamic radiation (right)	MH	-0.195411	2.49768e-24	0.697813	58.7805	-0.0019768	-54.4673	0	3.62933e-05	-0.002048	-0.00190559	0.00253115	33.334	6.19592e-153	7.59328e-05	0.00238209	0.0026802	3.37187e-21	0	8.3645e-150	53.5636	0	0
weighted_isovf	Weighted-mean ISOVF in tract anterior thalamic radiation (right)	LM	0.0835337	1.67103e-05	0.178286	56.5529	0.000607621	17.574	1.63163e-61	3.4575e-05	0.000539785	0.000675457	-0.00039361	-4.7236	2.73513e-06	8.33285e-05	-0.000557178	-0.000230042	0.022559	2.20271e-58	0.00369242	-11.0981	0	0
weighted_isovf	Weighted-mean ISOVF in tract cingulate gyrus part of cingulum (left)	LH	0.329612	1.45542e-68	0.672352	74.5052	0.00154469	41.5073	2.65091e-233	3.72149e-05	0.00147167	0.0016177	0.00461816	32.3831	4.555e-147	0.00014261	0.00433822	0.0048981	1.96481e-65	3.57873e-230	6.14925e-144	20.8532	0	0
weighted_isovf	Weighted-mean ISOVF in tract cingulate gyrus part of cingulum (left)	MH	-0.639812	1.34402e-306	0.564784	59.6248	-0.000653014	-15.7412	7.80342e-51	4.14843e-05	-0.000734405	-0.000571623	0.00226433	25.4124	1.18388e-104	8.91034e-05	0.00208943	0.00243924	1.81443e-303	1.05346e-47	1.59823e-101	29.6819	0	0
weighted_isovf	Weighted-mean ISOVF in tract cingulate gyrus part of cingulum (left)	LM	0.794955	0	0.809542	62.9362	0.00218721	50.8897	1.93001e-298	4.29794e-05	0.00210288	0.00227153	0.00230657	26.6682	1.11961e-112	8.64914e-05	0.0021368	0.00247635	0	2.60551e-295	1.51148e-109	1.23591	0.216491	1
weighted_isovf	Weighted-mean ISOVF in tract cingulate gyrus part of cingulum (right)	LH	-0.070998	0.000244375	0.764701	62.7361	0.000656796	13.4929	1.05313e-38	4.86771e-05	0.000561294	0.000752299	0.00738805	50.283	2.03542e-248	0.000146929	0.00709963	0.00767646	0.329906	1.42173e-35	2.74781e-245	43.4884	0	0
weighted_isovf	Weighted-mean ISOVF in tract cingulate gyrus part of cingulum (right)	MH	0.290477	6.14621e-53	0.211887	NA	-0.00042749	-7.08907	2.31618e-12	6.03027e-05	-0.000545802	-0.000309178	0.00140476	14.8742	2.59107e-44	9.44427e-05	0.00121938	0.00159015	8.29739e-50	3.12684e-09	3.49794e-41	16.3517	0	0
weighted_isovf	Weighted-mean ISOVF in tract cingulate gyrus part of cingulum (right)	LM	-0.183122	2.07911e-21	0.775444	67.3126	0.00103907	16.2664	8.95872e-54	6.38781e-05	0.000913737	0.00116439	0.00585171	39.443	5.52436e-190	0.000148359	0.00556049	0.00614292	2.8068e-18	1.20943e-50	7.45789e-187	29.7948	0	0
weighted_isovf	Weighted-mean ISOVF in tract parahippocampal part of cingulum (left)	LH	-0.508619	2.81428e-175	0.527867	62.0628	-0.00374291	-58.8724	0	6.35766e-05	-0.00386764	-0.00361817	0.00171481	5.88342	5.93351e-09	0.000291464	0.00114267	0.00228694	3.79928e-172	0	8.01024e-06	18.295	0	0
weighted_isovf	Weighted-mean ISOVF in tract parahippocampal part of cingulum (left)	MH	-0.735129	0	0.505812	69.4508	-0.0007992	-10.3319	5.11852e-24	7.73524e-05	-0.000950963	-0.000647437	-0.00425953	-18.5782	3.17523e-64	0.000229276	-0.00470959	-0.00380947	0	6.91e-21	4.28656e-61	-14.3005	0	0
weighted_isovf	Weighted-mean ISOVF in tract parahippocampal part of cingulum (left)	LM	-0.092277	1.96236e-06	0.628607	59.2115	-0.00301763	-32.4504	4.00093e-165	9.2992e-05	-0.00320008	-0.00283518	0.00580333	38.593	5.18463e-185	0.000150372	0.00550816	0.0060985	0.00264918	5.40126e-162	6.99925e-182	49.8914	0	0
weighted_isovf	Weighted-mean ISOVF in tract parahippocampal part of cingulum (right)	LH	-0.624659	2.35436e-288	0.770099	67.8829	0.00155127	40.0602	1.25262e-222	3.87234e-05	0.00147529	0.00162724	-0.00358717	-25.902	1.43699e-107	0.00013849	-0.00385902	-0.00331532	3.17838e-285	1.69104e-219	1.93993e-104	-35.7327	0	0
weighted_isovf	Weighted-mean ISOVF in tract parahippocampal part of cingulum (right)	MH	-0.358648	1.18634e-81	0.516206	70.6577	0.00209163	24.7731	1.75883e-109	8.44317e-05	0.00192598	0.00225729	-0.00392017	-21.2457	1.26946e-79	0.000184516	-0.00428237	-0.00355798	1.60156e-78	2.37442e-106	1.71377e-76	-29.6271	0	0
weighted_isovf	Weighted-mean ISOVF in tract parahippocampal part of cingulum (right)	LM	-0.352151	3.46644e-78	0.161421	61.5096	-0.000580153	-7.1448	1.58447e-12	8.11993e-05	-0.000739466	-0.00042084	0.000296714	2.65644	0.00805404	0.000111696	7.74626e-05	0.000515966	4.6797e-75	2.13903e-09	1	6.34988	2.15489e-10	2.9091e-07
weighted_isovf	Weighted-mean ISOVF in tract corticospinal tract (left)	LH	0.909056	0	0.910381	70.2992	0.000286099	21.787	8.69611e-89	1.31316e-05	0.000260335	0.000311863	0.00234311	64.314	3.22314673e-316	3.64324e-05	0.0022716	0.00241463	0	1.17397e-85	4.35124807955e-313	53.1161	0	0
weighted_isovf	Weighted-mean ISOVF in tract corticospinal tract (left)	MH	0.388719	8.72163e-97	0.299774	77.2722	-0.000124567	-8.55694	3.54572e-17	1.45575e-05	-0.000153129	-9.60059e-05	0.000257835	5.15634	3.18384e-07	5.00035e-05	0.00015968	0.00035599	1.17742e-93	4.78672e-14	0.000429818	7.34267	2.09388e-13	2.82674e-10
weighted_isovf	Weighted-mean ISOVF in tract corticospinal tract (left)	LM	0.775963	0	0.725031	58.4631	0.000407609	24.3114	6.04714e-106	1.67662e-05	0.000374714	0.000440505	0.00205102	36.6035	3.02893e-173	5.60335e-05	0.00194103	0.00216101	0	8.16364e-103	4.08906e-170	28.0983	0	0
weighted_isovf	Weighted-mean ISOVF in tract corticospinal tract (right)	LH	0.566207	8.29946e-226	0.75759	70.5892	0.000407776	22.9497	9.56938e-97	1.77682e-05	0.000372915	0.000442637	0.00229665	59.4811	5.31789e-294	3.86113e-05	0.00222085	0.00237244	1.12043e-222	1.29187e-93	7.17915e-291	44.4403	0	0
weighted_isovf	Weighted-mean ISOVF in tract corticospinal tract (right)	MH	0.780272	0	0.579334	72.9981	0.000241962	18.2568	8.45815e-66	1.32532e-05	0.000215959	0.000267964	7.53823e-05	1.66041	0.0972272	4.53998e-05	-1.37357e-05	0.0001645	0	1.14185e-62	1	-3.52216	0.000428048	0.577865
weighted_isovf	Weighted-mean ISOVF in tract corticospinal tract (right)	LM	-0.273934	8.21848e-47	0.617208	NA	0.00017375	8.6714	1.4081e-17	2.00371e-05	0.000134437	0.000213063	0.00217626	38.6014	4.63359e-185	5.63778e-05	0.00206559	0.00228693	1.1095e-43	1.90093e-14	6.25534e-182	33.4685	0	0
weighted_isovf	Weighted-mean ISOVF in tract forceps major	LH	0.771769	0	0.685421	70.2755	-0.000179263	-8.02929	2.34446e-15	2.23261e-05	-0.000223066	-0.00013546	-0.000130597	-3.01972	0.00261155	4.32482e-05	-0.000215492	-4.57025e-05	0	3.16502e-12	1	0.999881	0.317368	1
weighted_isovf	Weighted-mean ISOVF in tract forceps major	MH	-0.205332	9.61323e-27	0.561701	55.0192	-0.000756759	-31.6948	4.14962e-160	2.38764e-05	-0.000803603	-0.000709914	-0.00149088	-41.1294	9.46794e-199	3.62486e-05	-0.00156204	-0.00141973	1.29779e-23	5.60199e-157	1.27817e-195	-16.9132	0	0
weighted_isovf	Weighted-mean ISOVF in tract forceps major	LM	0.897847	0	0.816142	59.3577	0.00057867	29.428	8.27844e-143	1.96639e-05	0.000540089	0.00061725	0.00131086	29.6657	3.99923e-131	4.41878e-05	0.00122413	0.0013976	0	1.11759e-139	5.39897e-128	15.1387	0	0
weighted_isovf	Weighted-mean ISOVF in tract forceps minor	LH	-0.110685	1.01098e-08	0.85925	59.4977	-0.00156365	-69.5552	0	2.24808e-05	-0.00160776	-0.00151955	0.00346568	60.1115	5.78689e-297	5.76541e-05	0.0033525	0.00357885	1.36482e-05	0	7.81231e-294	81.2729	0	0
weighted_isovf	Weighted-mean ISOVF in tract forceps minor	MH	-0.313823	6.06535e-62	0.646331	59.8465	-0.0013852	-63.8173	0	2.17058e-05	-0.00142779	-0.00134262	0.000531129	9.86119	1.02739e-21	5.38606e-05	0.000425403	0.000636856	8.18822e-59	0	1.38698e-18	33.0005	0	0
weighted_isovf	Weighted-mean ISOVF in tract forceps minor	LM	0.176973	4.44383e-20	0.781759	72.5352	-0.000190366	-9.17391	2.01182e-19	2.07507e-05	-0.000231079	-0.000149653	0.00289229	42.2625	3.14221e-206	6.84364e-05	0.00275796	0.00302663	5.99917e-17	2.71596e-16	4.24198e-203	43.1062	0	0
weighted_isovf	Weighted-mean ISOVF in tract inferior fronto-occipital fasciculus (left)	LH	-0.0633812	0.00106141	0.690929	64.0644	-0.00131531	-41.5999	5.52841e-234	3.16182e-05	-0.00137735	-0.00125328	0.0027634	35.369	5.45454e-165	7.81306e-05	0.00261003	0.00291677	1	7.46335e-231	7.36363e-162	48.3914	0	0
weighted_isovf	Weighted-mean ISOVF in tract inferior fronto-occipital fasciculus (left)	MH	-0.284359	1.03059e-50	0.742309	58.3694	-0.00232954	-75.9683	0	3.06647e-05	-0.0023897	-0.00226938	-0.000363163	-5.12386	3.76355e-07	7.08769e-05	-0.000502292	-0.000224035	1.39129e-47	0	0.000508079	25.4626	0	0
weighted_isovf	Weighted-mean ISOVF in tract inferior fronto-occipital fasciculus (left)	LM	0.300434	2.17679e-56	0.709174	56.1177	0.000980131	24.1534	7.74173e-105	4.05794e-05	0.000900514	0.00105975	0.00306809	33.5243	1.00956e-154	9.15183e-05	0.00288844	0.00324773	2.93867e-53	1.04513e-101	1.36291e-151	20.8563	0	0
weighted_isovf	Weighted-mean ISOVF in tract inferior fronto-occipital fasciculus (right)	LH	-0.0258547	0.182101	0.615502	64.5719	-0.000519766	-18.1011	7.46641e-65	2.87147e-05	-0.000576104	-0.000463429	0.00225131	36.7091	6.28041e-173	6.13285e-05	0.00213093	0.0023717	1	1.00796e-61	8.47856e-170	40.9209	0	0
weighted_isovf	Weighted-mean ISOVF in tract inferior fronto-occipital fasciculus (right)	MH	0.189747	5.23726e-23	0.634449	71.2147	-0.00179446	-67.455	0	2.66024e-05	-0.00184666	-0.00174227	0.000619995	6.32352	4.2693e-10	9.80458e-05	0.000427534	0.000812455	7.07031e-20	0	5.76356e-07	23.7665	0	0
weighted_isovf	Weighted-mean ISOVF in tract inferior fronto-occipital fasciculus (right)	LM	-0.274104	7.18805e-47	0.689197	NA	0.00124734	35.1927	1.80831e-185	3.54432e-05	0.0011778	0.00131688	0.00161716	17.5177	2.01456e-58	9.23157e-05	0.00143595	0.00179837	9.70387e-44	2.44122e-182	2.71966e-55	3.73984	0.000184136	0.248584
weighted_isovf	Weighted-mean ISOVF in tract inferior longitudinal fasciculus (left)	LH	0.154771	9.39151e-16	0.570938	69.9855	-0.00147846	-43.5319	4.03781e-248	3.39628e-05	-0.0015451	-0.00141183	0.00132442	20.1235	4.95951e-73	6.58143e-05	0.00119522	0.00145361	1.26785e-12	5.45105e-245	6.69533e-70	37.8457	0	0
weighted_isovf	Weighted-mean ISOVF in tract inferior longitudinal fasciculus (left)	MH	-0.343789	9.39336e-75	0.665004	56.588	-0.00177682	-81.2834	0	2.18596e-05	-0.00181971	-0.00173393	-0.00289015	-31.6727	7.06096e-143	9.12505e-05	-0.00306927	-0.00271103	1.2681e-71	0	9.53229e-140	-11.8651	0	0
weighted_isovf	Weighted-mean ISOVF in tract inferior longitudinal fasciculus (left)	LM	0.430058	1.01995e-119	0.818591	55.0055	0.000259316	9.25058	1.03365e-19	2.80324e-05	0.000204316	0.000314316	0.00404765	47.0045	1.26905e-232	8.6112e-05	0.00387862	0.00421668	1.37693e-116	1.39542e-16	1.71321e-229	41.8323	0	0
weighted_isovf	Weighted-mean ISOVF in tract inferior longitudinal fasciculus (right)	LH	-0.285057	5.30822e-51	0.380538	64.9828	-0.0004642	-16.9133	1.17832e-57	2.74458e-05	-0.000518048	-0.000410353	0.000873912	14.748	1.15964e-43	5.92564e-05	0.000757594	0.000990231	7.1661e-48	1.59073e-54	1.56551e-40	20.4906	0	0
weighted_isovf	Weighted-mean ISOVF in tract inferior longitudinal fasciculus (right)	MH	-0.27491	2.18858e-47	0.476103	57.3363	-0.00121783	-58.5661	0	2.07941e-05	-0.00125863	-0.00117703	-0.0018809	-17.8494	3.77024e-60	0.000105376	-0.00208775	-0.00167405	2.95458e-44	0	5.08983e-57	-6.17339	6.6841e-10	9.02353e-07
weighted_isovf	Weighted-mean ISOVF in tract inferior longitudinal fasciculus (right)	LM	-0.0791282	4.56051e-05	0.67676	NA	0.000728994	24.5046	2.65179e-107	2.97493e-05	0.000670626	0.000787363	0.00267581	30.0778	1.1719e-133	8.8963e-05	0.00250118	0.00285044	0.0615669	3.57992e-104	1.58206e-130	20.7538	0	0
weighted_isovf	Weighted-mean ISOVF in tract middle cerebellar peduncle	LH	0.808775	0	0.784416	59.3566	0.00107879	37.6801	5.97665e-205	2.86303e-05	0.00102262	0.00113496	0.00295064	50.0313	4.16179e-247	5.89757e-05	0.00283487	0.0030664	0	8.06848e-202	5.61841e-244	28.5526	0	0
weighted_isovf	Weighted-mean ISOVF in tract middle cerebellar peduncle	MH	0.306609	4.51431e-59	0.304141	57.3559	0.00105948	33.5597	4.98964e-174	3.15699e-05	0.000997537	0.00112142	-0.000722345	-6.9087	1.0053e-11	0.000104556	-0.000927584	-0.000517106	6.09432e-56	6.73601e-171	1.35715e-08	-16.3144	0	0
weighted_isovf	Weighted-mean ISOVF in tract middle cerebellar peduncle	LM	0.419526	1.97385e-113	0.579979	70.7702	2.86168e-06	0.0795392	0.936617	3.59782e-05	-6.77276e-05	7.3451e-05	0.00361523	27.9461	1.53607e-120	0.000129364	0.0033613	0.00386916	2.6647e-110	1	2.0737e-117	26.9029	0	0
weighted_isovf	Weighted-mean ISOVF in tract medial lemniscus (left)	LH	0.80721	0	0.67562	55	0.000317522	17.1373	5.44638e-59	1.85281e-05	0.00028117	0.000353873	0.000657145	26.2477	1.12245e-109	2.50363e-05	0.000607999	0.00070629	0	7.35261e-56	1.51531e-106	10.904	0	0
weighted_isovf	Weighted-mean ISOVF in tract medial lemniscus (left)	MH	-0.731167	0	0.67225	70.2231	0.000109838	3.65038	0.000273284	3.00895e-05	5.08033e-05	0.000168873	-0.00147921	-41.7757	2.01274e-202	3.54084e-05	-0.00154871	-0.0014097	0	0.368934	2.7172e-199	-34.1977	0	0
weighted_isovf	Weighted-mean ISOVF in tract medial lemniscus (left)	LM	0.923848	0	0.916462	63.0087	0.000214655	10.7273	1.14129e-25	2.00102e-05	0.000175395	0.000253915	0.00208768	65.6748	0	3.17881e-05	0.00202528	0.00215008	0	1.54074e-22	0	49.8651	0	0
weighted_isovf	Weighted-mean ISOVF in tract medial lemniscus (right)	LH	-0.538319	3.81452e-200	0.483112	74.7222	0.00028391	10.2161	1.53316e-23	2.77904e-05	0.000229386	0.000338434	-0.00115656	-35.9147	3.12772e-168	3.2203e-05	-0.00121977	-0.00109335	5.14961e-197	2.06977e-20	4.22242e-165	-33.8645	0	0
weighted_isovf	Weighted-mean ISOVF in tract medial lemniscus (right)	MH	-0.401322	1.28668e-103	0.799201	72.6615	0.00113466	32.5859	9.37233e-167	3.48205e-05	0.00106634	0.00120297	-0.00224936	-63.7566	3.8722503114e-314	3.52805e-05	-0.00231862	-0.00218011	1.73701e-100	1.26526e-163	5.227537920408e-311	-68.2676	0	0
weighted_isovf	Weighted-mean ISOVF in tract medial lemniscus (right)	LM	0.194799	4.58001e-24	0.780046	71.157	-0.000857712	-48.4802	9.3445e-282	1.7692e-05	-0.000892423	-0.000823	0.00108247	39.1213	3.39615e-188	2.76696e-05	0.00102815	0.00113678	6.18301e-21	1.26151e-278	4.58481e-185	59.0758	0	0
weighted_isovf	Weighted-mean ISOVF in tract posterior thalamic radiation (left)	LH	-0.66756	0	0.703858	70.4302	-0.00210893	-56.7411	0	3.71675e-05	-0.00218185	-0.00203601	-0.00504129	-41.8332	1.5335e-202	0.000120509	-0.00527784	-0.00480473	0	0	2.07022e-199	-23.2523	0	0
weighted_isovf	Weighted-mean ISOVF in tract posterior thalamic radiation (left)	MH	-0.935998	0	0.897396	63.7546	-0.00240704	-82.295	0	2.9249e-05	-0.00246443	-0.00234966	-0.007494	-61.0217	1.31916e-301	0.000122809	-0.00773507	-0.00725293	0	0	1.78087e-298	-40.2947	0	0
weighted_isovf	Weighted-mean ISOVF in tract posterior thalamic radiation (left)	LM	0.858208	0	0.804895	63.1054	0.000283828	12.0153	1.94771e-31	2.36222e-05	0.000237481	0.000330174	0.00228115	26.6532	1.38508e-112	8.55864e-05	0.00211315	0.00244915	0	2.62941e-28	1.86986e-109	22.4958	0	0
weighted_isovf	Weighted-mean ISOVF in tract posterior thalamic radiation (right)	LH	-0.62557	1.94698e-289	0.417634	66.7463	-0.000611996	-20.5268	2.30793e-80	2.98145e-05	-0.000670491	-0.000553501	-0.000995893	-8.56229	5.74159e-17	0.000116312	-0.00122421	-0.000767577	2.62842e-286	3.1157e-77	7.75115e-14	-3.19722	0.00138757	1
weighted_isovf	Weighted-mean ISOVF in tract posterior thalamic radiation (right)	MH	-0.826345	0	0.690761	66.7225	-0.000403344	-20.5595	1.49781e-80	1.96184e-05	-0.000441835	-0.000364854	-0.00187766	-19.8149	2.80152e-71	9.47601e-05	-0.00206367	-0.00169165	0	2.02204e-77	3.78206e-68	-15.2354	0	0
weighted_isovf	Weighted-mean ISOVF in tract posterior thalamic radiation (right)	LM	0.188131	1.5825e-22	0.315281	67.9171	-0.00022721	-9.45785	1.66874e-20	2.40234e-05	-0.000274344	-0.000180076	0.00091412	14.4944	1.86495e-42	6.30672e-05	0.000790324	0.00103792	2.13638e-19	2.2528e-17	2.51768e-39	16.9117	0	0
weighted_isovf	Weighted-mean ISOVF in tract superior longitudinal fasciculus (left)	LH	0.0973081	4.82894e-07	0.48485	67.5452	-0.000983304	-46.3807	1.06937e-268	2.12007e-05	-0.0010249	-0.000941709	0.00118319	14.7791	8.07452e-44	8.00581e-05	0.00102604	0.00134034	0.000651907	1.44365e-265	1.09006e-40	26.1598	0	0
weighted_isovf	Weighted-mean ISOVF in tract superior longitudinal fasciculus (left)	MH	-0.783475	0	0.677541	58.3259	-0.000935659	-54.0379	9e-322	1.73149e-05	-0.00096963	-0.000901687	-0.00136103	-18.7206	4.98839e-65	7.27025e-05	-0.00150375	-0.00121832	0	1.21392e-318	6.73433e-62	-5.6917	1.2578e-08	1.69803e-05
weighted_isovf	Weighted-mean ISOVF in tract superior longitudinal fasciculus (left)	LM	0.766807	0	0.843711	62.4042	-6.14028e-05	-3.55262	0.000396648	1.72838e-05	-9.53137e-05	-2.7492e-05	0.00248471	44.4782	1.03684e-218	5.58635e-05	0.00237506	0.00259437	0	0.535475	1.39974e-215	43.541	0	0
weighted_isovf	Weighted-mean ISOVF in tract superior longitudinal fasciculus (right)	LH	0.136642	1.40137e-12	0.752075	55.0027	-0.000214368	-12.9948	3.40783e-36	1.64965e-05	-0.000246733	-0.000182002	0.00353733	48.5153	3.86658e-239	7.29117e-05	0.00339421	0.00368046	1.89185e-09	4.60058e-33	5.21988e-236	50.1869	0	0
weighted_isovf	Weighted-mean ISOVF in tract superior longitudinal fasciculus (right)	MH	-0.428901	1.23393e-119	0.439435	57.5294	-0.000779241	-50.645	1.66552e-298	1.53863e-05	-0.000809428	-0.000749053	0.000393704	6.31869	4.39814e-10	6.23079e-05	0.000271396	0.000516012	1.66581e-116	2.24845e-295	5.93749e-07	18.276	0	0
weighted_isovf	Weighted-mean ISOVF in tract superior longitudinal fasciculus (right)	LM	0.716807	0	0.827003	55.0055	0.000556298	38.1321	3.20674e-207	1.45887e-05	0.000527675	0.000584921	0.0030979	49.6455	6.11875e-247	6.24004e-05	0.00297541	0.00322039	0	4.3291e-204	8.26031e-244	39.6611	0	0
weighted_isovf	Weighted-mean ISOVF in tract superior thalamic radiation (left)	LH	0.142642	1.38151e-13	0.54985	65.1769	-0.000357006	-25.0025	3.66572e-111	1.42788e-05	-0.000385021	-0.000328992	0.00177644	29.0838	5.34507e-127	6.10799e-05	0.00165654	0.00189633	1.86504e-10	4.94873e-108	7.21584e-124	34.0117	0	0
weighted_isovf	Weighted-mean ISOVF in tract superior thalamic radiation (left)	MH	-0.418249	2.86258e-113	0.335923	60.7637	-0.000232262	-13.1805	4.07925e-37	1.76216e-05	-0.000266835	-0.000197689	0.00069738	13.338	9.31879e-37	5.22854e-05	0.000594746	0.000800015	3.86449e-110	5.50699e-34	1.25804e-33	16.849	0	0
weighted_isovf	Weighted-mean ISOVF in tract superior thalamic radiation (left)	LM	0.759635	0	0.733931	60.7843	-0.000123975	-7.96193	3.99424e-15	1.5571e-05	-0.000154525	-9.34247e-05	0.00108692	26.9006	3.83382e-114	4.04049e-05	0.0010076	0.00116623	0	5.39223e-12	5.17566e-111	27.9643	0	0
weighted_isovf	Weighted-mean ISOVF in tract superior thalamic radiation (right)	LH	-0.118118	9.58144e-10	0.815921	66.1677	-0.000380588	-22.7123	4.16466e-95	1.6757e-05	-0.000413465	-0.000347712	0.00405481	72.6422	0	5.58189e-05	0.00394524	0.00416438	1.29349e-06	5.62228e-92	0	76.105	0	0
weighted_isovf	Weighted-mean ISOVF in tract superior thalamic radiation (right)	MH	-0.143067	1.1928e-13	0.499725	61.8981	-0.000292982	-16.2973	5.02759e-54	1.79774e-05	-0.000328253	-0.000257711	0.001639	37.265	2.30514e-176	4.39824e-05	0.00155267	0.00172534	1.61027e-10	6.78725e-51	3.11194e-173	40.6609	0	0
weighted_isovf	Weighted-mean ISOVF in tract superior thalamic radiation (right)	LM	0.0411811	0.0340545	0.728234	55.0055	-9.97015e-05	-5.19615	2.40008e-07	1.91876e-05	-0.000137348	-6.20555e-05	0.00240768	50.7502	1.29241e-252	4.74417e-05	0.00231455	0.0025008	1	0.000324011	1.74475e-249	48.9962	0	0
weighted_isovf	Weighted-mean ISOVF in tract uncinate fasciculus (left)	LH	0.250533	2.01012e-39	0.854458	69.5354	-0.00137872	-33.1029	9.94001e-171	4.16495e-05	-0.00146043	-0.001297	0.0101162	54.5093	6.45468e-270	0.000185586	0.00975187	0.0104805	2.71366e-36	1.3419e-167	8.71382e-267	60.4351	0	0
weighted_isovf	Weighted-mean ISOVF in tract uncinate fasciculus (left)	MH	0.00976151	0.614605	0.812458	73.1488	-0.0050696	-82.7455	0	6.12674e-05	-0.00518981	-0.0049494	0.00569406	40.5042	3.54237e-195	0.000140579	0.00541811	0.00597001	1	0	4.7822e-192	70.1901	0	0
weighted_isovf	Weighted-mean ISOVF in tract uncinate fasciculus (left)	LM	0.600752	1.20144e-259	0.737654	57.2299	0.00359812	78.1924	0	4.60163e-05	0.00350784	0.00368841	0.00455491	24.9575	3.45e-102	0.000182507	0.00419666	0.00491316	1.62194e-256	0	4.6575e-99	5.0834	3.70741e-07	0.0005005
weighted_isovf	Weighted-mean ISOVF in tract uncinate fasciculus (right)	LH	-0.660299	0	0.656781	65.6829	-0.000197507	-8.19675	6.35063e-16	2.40958e-05	-0.000244783	-0.000150232	0.00341555	22.4556	9.37805e-87	0.000152103	0.00311698	0.00371413	0	8.57335e-13	1.26604e-83	23.4615	0	0
weighted_isovf	Weighted-mean ISOVF in tract uncinate fasciculus (right)	MH	-0.773045	0	0.854125	60.9085	-0.00449824	-95.6765	0	4.70151e-05	-0.00459048	-0.004406	0.00105025	6.96331	6.98442e-12	0.000150827	0.000754185	0.00134632	0	0	9.42897e-09	35.1205	0	0
weighted_isovf	Weighted-mean ISOVF in tract uncinate fasciculus (right)	LM	0.479395	2.59583e-152	0.802278	58.584	0.00433014	82.8544	0	5.2262e-05	0.0042276	0.00443268	0.00228575	17.8003	5.48029e-60	0.000128411	0.00203369	0.00253781	3.50437e-149	0	7.3984e-57	-14.7462	0	0

## Sheet: Supplementary Table 10
Supplementary Table 10: Sensitivity analysis for the choice of risk pair selections
pair	pheno.type	estimate	statistic	p.value	parameter	conf.low	conf.high	method	alternative	p.bonf
LH-MH	mean_fa	0.628967	5.48712	1.68709e-06	46	0.419868	0.774661	Pearson's product-moment correlation	two.sided	3.54289e-05
LH-MH	mean_md	0.454281	3.45855	0.00118109	46	0.195363	0.653999	Pearson's product-moment correlation	two.sided	0.024803
LH-MH	mean_mo	0.682555	6.33429	9.11784e-08	46	0.49428	0.809665	Pearson's product-moment correlation	two.sided	1.91475e-06
LH-MH	mean_icvf	0.496336	3.87766	0.000333409	46	0.24704	0.684008	Pearson's product-moment correlation	two.sided	0.0070016
LH-MH	mean_od	0.581838	4.85207	1.44158e-05	46	0.356667	0.74312	Pearson's product-moment correlation	two.sided	0.000302732
LH-MH	mean_isovf	0.560871	4.59476	3.37651e-05	46	0.329198	0.728854	Pearson's product-moment correlation	two.sided	0.000709068
LH-MH	Volumetric	0.511962	6.19373	1.08694e-08	108	0.359148	0.63804	Pearson's product-moment correlation	two.sided	2.28257e-07
LH-LM	mean_fa	0.43442	3.27118	0.00203421	46	0.171448	0.639606	Pearson's product-moment correlation	two.sided	0.0427184
LH-LM	mean_md	0.316124	2.25995	0.0286033	46	0.035146	0.550786	Pearson's product-moment correlation	two.sided	0.60067
LH-LM	mean_mo	0.27772	1.96072	0.0559833	46	-0.00696419	0.520762	Pearson's product-moment correlation	two.sided	1
LH-LM	mean_icvf	0.443195	3.3532	0.00160627	46	0.181975	0.645983	Pearson's product-moment correlation	two.sided	0.0337317
LH-LM	mean_od	0.501062	3.92688	0.000286242	46	0.252938	0.687341	Pearson's product-moment correlation	two.sided	0.00601108
LH-LM	mean_isovf	0.215392	1.49597	0.141491	46	-0.0732242	0.470718	Pearson's product-moment correlation	two.sided	1
LH-LM	Volumetric	0.374001	4.19087	5.70198e-05	108	0.200822	0.524511	Pearson's product-moment correlation	two.sided	0.00119742
LM-MH	mean_fa	-0.306776	-2.18606	0.0339374	46	-0.543533	-0.0248033	Pearson's product-moment correlation	two.sided	0.712685
LM-MH	mean_md	-0.619187	-5.34806	2.71049e-06	46	-0.768175	-0.406583	Pearson's product-moment correlation	two.sided	5.69204e-05
LM-MH	mean_mo	-0.322657	-2.31202	0.0253059	46	-0.555834	-0.0424101	Pearson's product-moment correlation	two.sided	0.531423
LM-MH	mean_icvf	-0.394837	-2.91474	0.00548244	46	-0.610484	-0.124691	Pearson's product-moment correlation	two.sided	0.115131
LM-MH	mean_od	-0.0926662	-0.631209	0.531028	46	-0.367134	0.196646	Pearson's product-moment correlation	two.sided	1
LM-MH	mean_isovf	-0.586115	-4.9063	1.20299e-05	46	-0.746012	-0.362319	Pearson's product-moment correlation	two.sided	0.000252628
LM-MH	Volumetric	-0.475405	-5.61576	1.53549e-07	108	-0.608482	-0.316321	Pearson's product-moment correlation	two.sided	3.22453e-06

[truncated: 4 more sheets: Supplementary Table 11, Supplementary Table 12, Supplementary Table 13, Supplementary Table 14]
